# Supplementary material for: REST Regulates Distinct Transcriptional Networks in Embryonic and Neural Stem Cells
Source: PLoS Biol. 2008 Oct 28;6(10):e256. doi: 10.1371/journal.pbio.0060256 (PMC2573930; doi:10.1371/journal.pbio.0060256)
Supplement: Dataset S3 — (125 KB XLS) [file pbio.0060256.sd003.xls]

## Sheet: Canonical RE1
PET ID	Chromosome	Motif Start	Motif End	Sequence	Direction
7.13529	chr7	135292277	135292298	CTCGGCACCACTGACAGTCTG	+
7.12246	chr7	122462165	122462186	CTCAGCACCACGGACCTCAGC	+
12.7126	chr12	71265854	71265875	GCCAGCACCTTGGCCAGCGGC	+
1.85058	chr1	85058811	85058832	CTCAGCACCATGGACAGTTCA	+
5.7834	chr5	78340379	78340400	GGCAGAACCAGGGCCGGCGGT	+
3.70524	chr3	70524796	70524817	AGCAGCACCAGGGACAGCGCC	-
4.15003	chr4	150030429	150030450	TTCAGCACTCTGGACAGAGCT	+
17.3012	chr17	30116886	30116907	TTCAGCACCTAGGACAGTTCC	+
1.16891	chr1	168916349	168916370	GTCAGCACCTCGGACAGTTCC	-
2.18035	chr2	180347303	180347324	TCCAGCACCACGGAGAGCAAC	+
1.13648	chr1	136481415	136481436	TTCAGCACCACGGACAGCACC	+
1.84958	chr1	84959922	84959943	CTCAGCACCATGGACAGTTCA	-
2.94325	chr2	94325556	94325577	TTCAGCACCTTGGACAGAGCC	-
2.62987	chr2	62987051	62987072	ATCAGCACCACGGATAGCTCC	-
10.3557	chr10	3557654	3557675	TTCAGAACCATGGACAGCAGC	-
7.12303	chr7	123026758	123026779	TTCAGCACCATGGAGAGTGCC	+
7.44459	chr7	44462028	44462049	GCCAGAACCATGGACAGCTCC	-
5.12378	chr5	123784596	123784617	GGCAGCACCACGGCCCGGGGC	+
Y.749685	chrY	751660	751681	TTCAGTGACAAAGACAGATAC	+
4.15061	chr4	150607935	150607956	GTCAGCACCACGGTCAGCTCC	-
2.79261	chr2	79261663	79261684	ATCAGCACCGTGGACAACGCC	+
12.1029	chr12	102951743	102951764	TTCAGGACCACGGACAGCGAC	+
7.7837	chr7	78371538	78371559	TTCAGCACCATGGCCAGGGCT	-
4.13695	chr4	136948321	136948342	TCCAGGACCAGGGACAGCGCC	-
4.12667	chr4	126676015	126676036	TTCAGTACCCGGGACAGCTCC	-
12.6067	chr12	6068524	6068545	TTCAGCACCATGTCTGGGGAC	+
1.70658	chr1	70658973	70658994	CTCAGCACCACGGACAGCGCC	-
2.15272	chr2	152723833	152723854	GTCAGCACCAAGGACAGCGAC	+
1.13463	chr1	134627002	134627023	GTAGGTACCAAGGACAGCTCC	+
16.3432	chr16	34320261	34320282	TTCAGAACCGAGGACAGCGGC	-
11.1185	chr11	118475564	118475585	TTCAGGACCATGGACAGTACC	+
2.15637	chr2	156368534	156368555	TTCAGGACCACGGACAACTCC	-
7.42228	chr7	4223255	4223276	ATCAGCACCAAGGACAGCACC	-
Y.227782	chrY	243410	243431	CTCAGGACCTTAGGAAGAGTC	+
18.3625	chr18	36256417	36256438	CTCAGCACCAGGGTTAGGGAC	+
15.276	chr15	27599901	27599922	TTCAGCACCACGGACAGGTCC	+
11.1037	chr11	103736924	103736945	GTCAGCACCATGGACAGTATC	+
6.12843	chr6	128435222	128435243	TTCAGCACCACGGACAGCTCT	-
4.10307	chr4	103070073	103070094	TTCAGTACCATGGAGAGCAGC	-
2.15766	chr2	157662310	157662331	TTCAGCACCATGGACAGAAAC	-
15.6213	chr15	62126991	62127012	TTCAGGACCAAGGACAGTATC	+
2.29392	chr2	29395778	29395799	TTCAGCACCACGGACAGCGCC	+
13.24	chr13	23998486	23998507	ATCAGCACCATGGACAACGCA	-
1.74791	chr1	74791436	74791457	TTCAGCACCACGGACAGCGAA	-
6.11514	chr6	115144618	115144639	ATCAGTACCCTGGAGAGCTCC	+
4.10961	chr4	109617524	109617545	TTCAGGACCACGGTCAGCACC	+
3.68152	chr3	68152861	68152882	TTCAGCACCATGGAGAGGTCT	+
Y.1787228	chrY	1789163	1789184	TTTAGAACCAAAGTCAACAAT	-
4.1506	chr4	150603089	150603110	GTCAGCACCATGGTCAGCTCT	-
2.16467	chr2	164671139	164671160	TTCAGCACCACGGACAGCAGC	-
14.5445	chr14	54445725	54445746	GTCAGGACCAGGGGCAGCTCC	-
13.4246	chr13	42458093	42458114	ATCAGGACCATGGACAGTAGC	-
6.13485	chr6	134853947	134853968	TTCAGCACCACGGACAGCATT	+
9.49092	chr9	49093425	49093446	TTCAGCACCAAGGACAGCAGA	-
6.33056	chr6	33056832	33056853	CTCAGCTGCTTTGACAGCTCT	+
10.8865	chr10	88654517	88654538	TTCGGTACCATGGACAGCGCC	+
16.2053	chr16	20533441	20533462	TTTAGAACCTCGGGCCGCAGC	-
7.44203	chr7	44203842	44203863	TCCAGCACCGCGGACAGCTCC	-
13.8316	chr13	8316177	8316198	ATCAGCACCATGGACAGATCA	-
11.1167	chr11	116737018	116737039	TCCAGCACCACAGACAGCGCC	+
11.1076	chr11	107633490	107633511	TCCAGCACCACGGACAGCGGC	+
19.4707	chr19	47069985	47070006	ATCAGCACCTCGGACAGCGCC	-
4.91944	chr4	9196556	9196577	TTCAGCCGCGAGGACACCTGC	+
17.8473	chr17	84729113	84729134	TTCAGCACTGCGGACAGCTCT	+
2.79255	chr2	79255165	79255186	TACGGCACCATGGACAGCTCC	-
2.1718	chr2	171802087	171802108	GTCAGCACCATGGACAGCATG	+
8.34161	chr8	34161730	34161751	TTCAGTACCTTGGATAGCTCT	+
11.7775	chr11	77747096	77747117	ATCAGCACCACGGCCAGCGCC	-
9.34662	chr9	34662848	34662869	TTCAGCACCACGGACAGAGCC	-
17.7251	chr17	72508171	72508192	TTCAGCACCCTGGACAGCGTC	+
4.68439	chr4	68442186	68442207	GTCAGTACCATGGACAGCTCC	+
2.1041	chr2	104100202	104100223	TTCAGGACCACGGACAGCGAC	+
14.6263	chr14	62635728	62635749	GGCAGCACCACGGACAGCTCC	+
7.1013	chr7	101296150	101296171	TTCAGCACCATGGAGAAGGAC	+
10.4523	chr10	45235421	45235442	TTCAGGACCATGGACAGAGAG	-
4.15013	chr4	150133174	150133195	GCCAGCACCACGGACAGAGGC	+
9.11956	chr9	119555595	119555616	TTCAGCACCACGGACAGAGCA	-
1.13456	chr1	134561560	134561581	ATCAGCACTGCGGACAGCGAC	+
8.73814	chr8	73814779	73814800	TTCAGGACCGCGGACAGCGTC	+
1.80635	chr1	80635247	80635268	TTCAGCACCTTGGCCAACACT	-
7.12152	chr7	121521559	121521580	ATCAGCACCGTGGACAGCAAC	-
11.7172	chr11	71725002	71725023	TTCAGCACCATGGATAGTAGC	-
8.10818	chr8	108180200	108180221	TTCAGGACCAAGGCCAAGGCT	+
11.5545	chr11	55451359	55451380	TTCAGCACCACGGAGAGCGTC	+
17.2909	chr17	29089198	29089219	TTCAGCACCTGGGACAGCTCA	+
2.13165	chr2	131649595	131649616	TTCAGCACCTCGGAGAGGGGC	+
1.1016	chr1	101602533	101602554	TTCAGCACCAGGGTGAAGGAC	-
2.12941	chr2	129407309	129407330	TGCAGCACCATGGACAGCGCA	-
2.18003	chr2	180033981	180034002	GGCAGCACCACGGACAGCGCC	+
2.19346	chr2	19346918	19346939	TTCAGCACCAAGGCCAGCGCA	+
10.9025	chr10	90253420	90253441	GTCAGTACTCTGGACAGCGAC	-
9.74655	chr9	74655148	74655169	GTCAGGACCCTGGACAGAGCC	+
3.31498	chr3	31499925	31499946	TTCAGCACCCCGGACAGCGGC	+
2.9219	chr2	92190693	92190714	CCTGGCACCTTGGACAGATCC	+
9.64462	chr9	64464733	64464754	CTCAGCACCTTGGACAGCACC	+
17.2513	chr17	25128233	25128254	TTCAGCACCACGGACAGCGAC	-
16.6215	chr16	62150628	62150649	TTCAGCACCACGGACAGTTTC	+
2.11847	chr2	118471173	118471194	TTCAGCACCAGAGCCCGGACA	+
13.5489	chr13	54886367	54886388	ATCAGGACCTTGGACAGTGCT	+
1.63548	chr1	63549074	63549095	TTCAGCACCCCGGACAGCACC	+
9.6442	chr9	64422733	64422754	TTCAGCACCAAGGACAGTACC	+
9.5071	chr9	50710353	50710374	GTCAGAACCTTGGAGAGTTCC	-
5.11353	chr5	113532639	113532660	TTCAGCACCAAGGACAGGGGC	-
10.7729	chr10	77289639	77289660	TTCAGGACCCTGGAGAGGGGC	-
11.3031	chr11	3034298	3034319	GGCAGCACAGTGGAGAACTCA	+
5.94503	chr5	9452338	9452359	TTCAGCACCAAGGTCAGCTGC	+
5.14031	chr5	140308092	140308113	TTCAGCACCAAGGGAGGGACA	+
9.58197	chr9	58197947	58197968	TTCAGCACCATGGACAGGCCC	-
2.15735	chr2	157355208	157355229	GTCAGCACCACGGACAGCGCT	+
2.1364	chr2	136405778	136405799	TTCAGCACCGCGGACAGCGAT	+
9.59375	chr9	59376440	59376461	TTCAGCACCGCGGACAGCGGC	+
11.104	chr11	104014156	104014177	TCCAGGACCTTGGACAGTACC	-
18.4252	chr18	42522242	42522263	TTCAGCACCACGGACAGCACA	-
9.57266	chr9	57266330	57266351	TTTAGCACCACGGACAGCTCC	-
11.1187	chr11	118743338	118743359	TTCAGAACCATGGACAGAAGC	-
16.9127	chr16	9128884	9128905	TTCAGCACCATGGAAAGTTCC	-
4.15127	chr4	151268338	151268359	TTCAGCACCCAGGACAGCTCC	-
1.36604	chr1	3660904	3660925	TTCAGCACCGAGGACAGCTCC	-
15.8815	chr15	88153084	88153105	GTCAGTACCATGGACAGAGCA	-
11.465	chr11	4650455	4650476	TTCAGCACCAGGGAGAGCGCC	+
11.4663	chr11	4663803	4663824	AAAAGTACCATGGACAGCTCC	+
9.56535	chr9	56536584	56536605	TTCAGCACCACGGACAGCGCC	-
4.47012	chr4	47014127	47014148	GGCAGTACCTTGGACAGCTCC	+
10.5984	chr10	59837588	59837609	GTGAGCCCCAGGGACAGATCC	+
7.44636	chr7	44638236	44638257	TTCAGCACCGAGGACAGCTAC	+
11.7499	chr11	74989716	74989737	ATCAGCACCGCGGACAGCGGC	-
7.11779	chr7	117792459	117792480	TTCAGCACCAGGGACAGCGCC	-
14.6586	chr14	65863998	65864019	GTCAGGACCACGGCCAGCGCC	-
6.89034	chr6	89035802	89035823	GTCAGCACCACGGACAGCTCC	+
6.28295	chr6	28295379	28295400	TTCAGAACCATGGACAACGGC	-
2.12105	chr2	121049879	121049900	TTCAGCACTAAGTAGAGGACA	-
5.13731	chr5	137314900	137314921	TTCAGCACGCTGGACAGCGCC	-
2.65419	chr2	65420802	65420823	TTCAGCACCACGGACAGCACC	+
11.7831	chr11	78312274	78312295	TTCAGGACCAAGGACAGGGCA	-
6.89063	chr6	8907684	8907705	TTCAGCACTACGGCCAGCGCC	+
11.1014	chr11	101418761	101418782	TTCAGCACCAGGGACAGCTCC	+
15.7854	chr15	78540433	78540454	CCCAGCACCTTGGACAGAGCA	-
10.4076	chr10	40760329	40760350	TTCAGGACCGCGGACAGCGGC	-
5.11078	chr5	110784860	110784881	TTCAGCACCACCGCGCGGGCT	-
4.12413	chr4	124135771	124135792	TTCAGCACCATGGCCAGTGCC	+
13.1066	chr13	106563169	106563190	TTCAGCACCCGGGACAGCTCT	-
12.1126	chr12	112589276	112589297	TTCAGCACCCTGGCCAGCGCC	-
12.1079	chr12	107918226	107918247	TTCAGCACCACGGACAGCGAC	+
9.91257	chr9	91258029	91258050	TTCAGCACCATGGATAGATCC	-
16.9122	chr16	91220185	91220206	TTCAGCACCAAGGACACCTCC	+
9.10513	chr9	105130561	105130582	GTCAGGACCTTGGACAGCGCC	-
16.3522	chr16	35222308	35222329	TTCAGTACCTTGGACAGAGCC	+
9.12164	chr9	121640093	121640114	GTCAGCACCTTGGACAGCAGC	-
5.27873	chr5	27875671	27875692	TCCAGAACCATGGACAGCTCA	+
8.74599	chr8	74600715	74600736	TTCAGCACCGGGGGCGCGGAC	+
5.86666	chr5	86666971	86666992	GTCAGGACCATGGACAGATAC	+
8.10858	chr8	108582990	108583011	CTCAGCACCACGGACAGCGGC	+
8.97917	chr8	97917707	97917728	TTCAGCACCACGGAGAGCGGC	+
4.44281	chr4	44281614	44281635	TTCAGGACCGCGGACAGCAAC	-
4.15424	chr4	154241479	154241500	TTCAGCACCGAGGACGGCGGA	+
19.2346	chr19	23463235	23463256	GACAGCACCTTGGATAGCTCC	+
2.54246	chr2	54246637	54246658	TTCAGGACCATGGAGAGCGAC	-
8.334	chr8	33400698	33400719	TTCAGCACCACAAAGAGGGAC	+
8.12214	chr8	122144825	122144846	TTCAGCACCGTGGCCAGAGGC	+
5.14695	chr5	146955093	146955114	TTCAGGACCGCGGACAGCACC	-
4.10105	chr4	101048765	101048786	GCCAGCACCACGGACAGCTCA	+
5.68251	chr5	68253174	68253195	TTCAGCACCTTGGACACAGAC	+
19.5423	chr19	54229263	54229284	CCTAGCACCAAGGACAGCTCC	+
1.34523	chr1	34524220	34524241	GTCAGCACCACGGCCAGCTCC	-
9.66101	chr9	66105568	66105589	GACAGCGCCCTAGGCAGAGGC	+
6.31647	chr6	31647846	31647867	TTCAGCACCACGGTCAGTGCC	-
15.7962	chr15	79618952	79618973	TTCAGCACCCTGGACAGAGCA	-
7.12674	chr7	126741147	126741168	TTCAGCACCTGGGCGCGAGGA	-
2.17201	chr2	172012280	172012301	TTCAGCACTATGGCCACGGAC	-
3.11842	chr3	118423580	118423601	TTCAGCACCTGGACCAGTGGA	-
18.6439	chr18	64391992	64392013	GTCAGCACCGCGGACAGCAGC	-
Y.548984	chrY	581947	581968	CTCATTACCTAGGGCAGCAGT	+
2.43435	chr2	43435759	43435780	TTCAGCACCAAGGACAGCGCA	-
9.43449	chr9	43449609	43449630	TTCAGCACCACGGACAGAGTC	-
11.3279	chr11	32789483	32789504	TCCAGCACCCAGGACAGCACC	+
13.7032	chr13	70322808	70322829	TTTTGCACCTAGGACAGGGGC	+
4.12862	chr4	128623342	128623363	GTCAGGACCCTGGAGAGCGAC	+
11.7443	chr11	74435524	74435545	ATCAGCACCGCGGACAGCGCC	-
3.15276	chr3	152758765	152758786	TTCAGCACCATGGACAGATCC	-
6.83893	chr6	83894054	83894075	CTCAGCACCTAGGACAGCACC	+
2.17912	chr2	179123307	179123328	TTAAGCACCCTGGACAGCACC	-
14.7895	chr14	78950175	78950196	GTCAGCACCTCGGACAGAGAC	+
12.1007	chr12	100669235	100669256	TTCAGGACCACGGAGAGCTCC	+
1.13745	chr1	137452641	137452662	GTTAGGCCCTGGGGCAGCGGC	-
18.7705	chr18	77055376	77055397	TTCAGGAGCAGAGACAAAAGC	+
1.12667	chr1	126673326	126673347	TTCAGGACCCTGGACAGTGCA	+
5.35848	chr5	35848677	35848698	TTCAGCACCGAGGACAGCGCC	-
5.14976	chr5	149757027	149757048	GCAAGGACCATGGACAGAGCA	+
14.5093	chr14	50933817	50933838	TTCAGTACCATGGAGAGTGCA	+
18.7762	chr18	77622132	77622153	TTCAGCACTGTGGACAGCGCC	+
1.12932	chr1	129324480	129324501	GTCAGCACCACGGACAGCCCT	+
1.17733	chr1	177328765	177328786	TTCAGCACCGTGGACCGCGGC	+
9.20604	chr9	20607874	20607895	CTCAGCACCACGGACAGATTC	-
10.9026	chr10	90256736	90256757	CTCAGCAGTTATGACAGCGCT	-
16.5797	chr16	5797912	5797933	TTCAGGGGCAGGGGCAGAAGC	-
1.12216	chr1	122159567	122159588	TTTAGCACCACGGACAGCGGC	+
18.7473	chr18	74733644	74733665	ATCAGTACCATGGACAGGGGT	-
Y.31180	chrY	39389	39410	CTCAAAACCGAAGGCAACGCC	+
6.88974	chr6	8898648	8898669	GGCAGGACCTCGGACAGCGCC	+
18.7748	chr18	77478851	77478872	GGCAGCACCACGGAGAGCTCC	+
2.18082	chr2	180823942	180823963	GCCAGCACCGAGGACAGCGCC	-
17.4638	chr17	46384257	46384278	TTCAGCACCTAGAACAGCTCC	-
8.77747	chr8	77748078	77748099	GGCAGCACCTTGGACAGCGCC	+
9.9983	chr9	99833183	99833204	TTCAGCACAATGGACAGCACC	-
7.81365	chr7	81366963	81366984	GCAGGCACCATGGACAGCGCC	-
18.3159	chr18	31590187	31590208	TTCAGCACCTCGGACAGAGCA	-
3.56877	chr3	56877374	56877395	ACCAGCACCTTGGACAGCACC	-
2.10948	chr2	109476883	109476904	TTCAGCACCTTGGACAGAGCC	+
9.40624	chr9	40624936	40624957	TTCAGCACCGCGGACAGATCC	+
12.4384	chr12	43843253	43843274	GCCCAGACCATGGACAGCACC	-
7.57459	chr7	57460216	57460237	GTCAGCACCTAGGACAGCGCC	-
11.1039	chr11	103869525	103869546	TTCAGCACCTTGGACAGAGGC	-
6.11929	chr6	119286295	119286316	ATCAGGACCCTGGACAGGGAC	-
4.42965	chr4	42966362	42966383	TTCAGCACTGTGGACAGAGGC	-
9.4002	chr9	40020310	40020331	CTCAGCACCACGGACAGTAGC	-
14.6144	chr14	61435688	61435709	TTCAGCACCAAGGCTAGCTCA	-
7.12118	chr7	121182548	121182569	TCTGGTACCCTGGACAGCTCC	+
11.305	chr11	3050315	3050336	TACAGCGCCCAGGACGGGGTC	+
11.3624	chr11	36239931	36239952	TTCAGGACCATGGAGAGCAGT	-
11.1035	chr11	103472808	103472829	TTCAGGACCATGGACAGCTCA	-
1.1688	chr1	168801325	168801346	TTCAGCACCTTGGAGAGAGCA	+
15.7239	chr15	72395960	72395981	CTCAGCACCGTGGACAGCGCC	-
5.37182	chr5	37184615	37184636	ATCAGCACCATGGACAGCCCC	+
2.25139	chr2	25141022	25141043	TTCAGCACCTCGGACAGCACC	-
16.9508	chr16	95081464	95081485	TTCAGGACCAGAGACAGCGCC	-
12.3367	chr12	33670098	33670119	CACAGGACCTTGGAGAGCTCC	+
7.18441	chr7	18441680	18441701	GCCAGCACCAGGGCCGGGGAC	-
11.7121	chr11	71205934	71205955	GTCAGCACCACGGAGAGCTGC	-
9.49781	chr9	49781458	49781479	TCCAGGACCATGGACAGAGGA	+
3.10709	chr3	107090721	107090742	TTCAGCACCATGGACAAGGGT	+
6.88941	chr6	88942836	88942857	TTCAGGACCATGGAGAGCAAC	-
16.5678	chr16	5680661	5680682	GTCAGCACCACGGACAGCTAC	+
17.6527	chr17	65269977	65269998	TTCAGCACCCTGGACAGCACA	-
4.21801	chr4	21803169	21803190	ATTGCCACCGTGGACAGCTCC	+
9.86819	chr9	86819740	86819761	ATCAGCACCAGGGCTGGGGAA	+
7.10892	chr7	108920795	108920816	CCCAGCACCATGGAGAGCTCC	+
11.8233	chr11	82331133	82331154	GTCAGCACCATGGACAGTGGC	-
17.3488	chr17	34878202	34878223	GTTGCCACCATGGACAGCGCC	+
8.1263	chr8	126300545	126300566	GTCAGCACCTCGGACAGCAAC	+
19.6501	chr19	6502785	6502806	CTCATCACCATGGACAGCGCC	-
1.16136	chr1	161360937	161360958	TTCAGCACCACGGAGAGCGAT	+
4.44527	chr4	44532978	44532999	TTCAGCACCACGGACAGCGGC	+
1.15941	chr1	159412176	159412197	TGCAGCACCTTGGACAGTTCC	+
10.1191	chr10	119108591	119108612	TTCAGCACCAAGGACAGCACC	+
5.12133	chr5	121329499	121329520	TTCAGCACTGCGGACAGCACT	+
4.36074	chr4	36073810	36073831	TTCAGCACCCAGGACAGCAAC	+
17.3358	chr17	33583247	33583268	GTTGCCACCATGGACAGCTCC	-
4.12436	chr4	124364421	124364442	AGCAGCACCAGGAAGAGGGCG	+
4.22736	chr4	22736641	22736662	GTCAGTACCATGGATAGCTCC	+
9.12185	chr9	121855471	121855492	TTCAGTACAATGGACAGCGAC	+
12.7849	chr12	78494091	78494112	TTCAGCACCCTGGCCAGAGCC	-
11.5415	chr11	54146671	54146692	TCCAGCACCGAGGACAGCGCT	-
Y.978381	chrY	982435	982456	ATCAGCCCCACGGACAACAAT	+
1.19474	chr1	194736879	194736900	GTCAGGACCACGGACAGGTCT	+
5.13613	chr5	136128229	136128250	TTCAGCACCACGGATAGCTGC	-
5.37124	chr5	37124389	37124410	TTCAGCACCAAGAACAGCGAC	-
11.7317	chr11	73170383	73170404	GTCAGCACCCAGGACAGCAGC	-
4.10337	chr4	103373674	103373695	ATCAGCACCCAGGACAGCTCC	+
2.92202	chr2	92202205	92202226	GTCAGCACTTCGGAGAGCGCC	-
17.91	chr17	91001212	91001233	CGCAGTACCATGGAGAGCGGC	+
15.7449	chr15	74486397	74486418	CTCAGCACCACGGACAGAGCT	+
8.13447	chr8	13448322	13448343	TTCAGCACCTGGAACAGCTCC	+
9.69655	chr9	69655978	69655999	ATCAGGACCATGGACAGTACC	+
8.12464	chr8	124647768	124647789	TTCAGCACCATGGACAGAACC	-
X.139150826	chrX	139151242	139151263	TTCAGCACCATGGACAGCACA	+
6.95187	chr6	95189144	95189165	TTTAGCACCAAGGACAGCGAC	+
3.84883	chr3	8491302	8491323	TTCAGCACCACGGACAGCGCT	+
2.15634	chr2	156344470	156344491	TTCAGCACCATGGCCAGCGGC	+
9.4865	chr9	48650676	48650697	TTCAGCACCACGGCTAGCACC	-
5.14047	chr5	140470558	140470579	TCCAGCACCCTGGACAGCATC	-
11.8323	chr11	83233449	83233470	TTCAGCACCATGGAGAGAGCT	+
13.1021	chr13	102133116	102133137	TTCAGCACCACAGCTGGGGGA	-
14.3115	chr14	31150922	31150943	GTCAGCACCTCGGACAGCGAG	+
4.446	chr4	44599882	44599903	GTCAGGACCAAGGACAGCAGC	-
13.5495	chr13	54955144	54955165	TCCAGGACCAAGGACAGCACC	-
2.53261	chr2	53262500	53262521	TTCAGGACCACGGACAGCTCT	+
11.3564	chr11	35642478	35642499	GTCAGCACCAGGGACAGCTAC	+
1.16146	chr1	161458179	161458200	TTCAGCACCTTGGATAGCTCA	+
1.1603	chr1	160301942	160301963	AGCAGAACAATAGACAGCAGC	+
6.10738	chr6	107381741	107381762	TTCAGTACCAAGGACAGCGCC	+
17.45	chr17	45000069	45000090	TTCAGCACCTGGGACAGGGCC	+
2.15547	chr2	155467206	155467227	TTCAGCACCGCGGACAGAGGC	+
1.19544	chr1	195439734	195439755	TTCAGGACCATGGACAGGGCA	-
5.27697	chr5	27696922	27696943	ACCAGTACCTTGGAGAGCGAC	-
2.15163	chr2	151629436	151629457	CTCAGGACCAAGGACAGGGGC	-
17.2497	chr17	24967335	24967356	GTCAGCACCTCGGCCAGCTCC	+
19.4474	chr19	44745856	44745877	TTCAGAACCATGGACAGAGGC	+
1.75157	chr1	75160523	75160544	CTCAGCACCACGGACAGCTCC	-
9.58638	chr9	58639995	58640016	TTCAGCACCATGGACAGTGTC	-
11.9814	chr11	98140248	98140269	GTCAGCACCTAGGAGTGGACA	+
4.41734	chr4	41734775	41734796	TTCAGAACGCTGGATAGCTCC	-
1.12222	chr1	122218063	122218084	TTCAGCACCACGGTCAGCGCC	-
5.71407	chr5	71407206	71407227	GTCAGCACCAAGGACAGAGAC	-
1.72467	chr1	72470349	72470370	TTCAGCACCTGGGTGAGTGGA	+
Y.1831833	chrY	1837769	1837790	ATTGGCACCTGGGCTAGCACC	-
7.82501	chr7	82501709	82501730	GTCAGAACCATGGACAGCGCC	-
1.75361	chr1	75362218	75362239	GGCCGCAGCACGGACAGCAGC	+
11.9813	chr11	98130330	98130351	TTCAGCACCACGGACAGAGAC	-
9.4371	chr9	43710729	43710750	GCCAGCACCATGGACAGCTCC	-
3.10544	chr3	105435926	105435947	GTCAGCACCTTGGAGAGTTCC	+
15.8275	chr15	82749054	82749075	CCCAGCACCCTGGACAGCACC	-
Y.678623	chrY	689243	689264	TTCAGGGCCAAGGACATGGTT	+
2.16358	chr2	163581045	163581066	GCTAGCACCATGGACAGTTCC	-
Y.511798	chrY	516258	516279	TTCACAAGCTAAGACAGTGAC	+
5.1108	chr5	110798829	110798850	ACGAACACCATGGACAGCTCC	+
19.4171	chr19	41714485	41714506	TTCAGGACCAGGGACAGCTCT	-
10.6031	chr10	60309940	60309961	GTCAGGACCATGGACAGAGAC	-
5.13483	chr5	134829653	134829674	CTCAGGACCTAGGACAGCACC	+
16.1227	chr16	12272883	12272904	TTCAGCACCACGGACAGCACA	-
7.27972	chr7	27972741	27972762	GTCAGCACCACGGACAGCACT	-
2.16515	chr2	165148108	165148129	TTCAGGACCATGGAGAGCACA	-
15.739	chr15	73903408	73903429	TTCAGGACCATGGACAGCTCC	-
17.3945	chr17	39453798	39453819	TTTAGCGCCGCGGTCAGTTGG	+
14.2848	chr14	28484213	28484234	TTCAGCACCAAGGACAGCAAC	-
8.93092	chr8	9309610	9309631	TTCAGCACCACGGACAGAGCC	-
2.18169	chr2	181694205	181694226	ATCAGCACTCTGGACAGCGCT	-
17.6934	chr17	69344283	69344304	GTCAGCACCTCGGACAGCTCC	-
4.11739	chr4	117391502	117391523	GTCAGGACCACGGACAGCGCA	-
12.1057	chr12	105667330	105667351	TTCAGGACCACGGACAGCTCC	-
11.8448	chr11	84478356	84478377	TTCAGCACCGGGGACAGCGAC	+
17.8292	chr17	82919340	82919361	TTCAGGACCCAGGACAGCACC	-
12.1057	chr12	105723507	105723528	TTCAGAACCATGGACAGCAGC	-
4.15113	chr4	151130897	151130918	GGCAGCACCACGGACAGCGCC	-
11.5916	chr11	5916535	5916556	TTCAGCACTAAGGACAGCAGC	+
18.2581	chr18	25811242	25811263	GTCAGCACCAAGGACAGGACT	-
7.15304	chr7	15306346	15306367	TTCAGCACCGCGGACAGCGCC	+
7.12922	chr7	129216840	129216861	GTCAGCACCCTGGACAGATCC	+
12.8269	chr12	82695180	82695201	TTCAGCACCGAGACCAGAGTC	-
3.13695	chr3	136952263	136952284	TTCAGAACCATGGACAGGGAT	-
1.74873	chr1	74873195	74873216	ACCAGCACCACGGACAGCTCC	+
14.6401	chr14	64013116	64013137	GTCAGCACCATGGACAGCTCA	+
12.4187	chr12	41866651	41866672	ATCAGCACCATGGATAGCTCT	+
4.12036	chr4	120364103	120364124	AGCAGCACCAAGGACAGCGGC	-
12.1094	chr12	109442665	109442686	TTCAGCACCATGGACAGAGCC	-
12.1034	chr12	103350806	103350827	TTCAGCACCGGGGACAGCGCC	-
Y.313035	chrY	320772	320793	GTAAGTACCACTGACAGAGGG	-
2.12483	chr2	124827393	124827414	TTCAGCACTGCGGACAGCTCC	+
9.21158	chr9	21158596	21158617	TTCAGCACAAGGGACAGCGGC	-
2.32839	chr2	32840222	32840243	GCCAGCACCAAGGACAGCACC	+
15.7203	chr15	72030006	72030027	TTCAGCACCGTGGACAGTACC	+
5.62769	chr5	62771954	62771975	TTCAGCACCACGGACAGCACA	+
18.3613	chr18	36130782	36130803	ATCAGCACCATGGAGAGTGCT	-
14.3593	chr14	35927307	35927328	TTCAGCACCATGGCCAGAGTG	+
1.75145	chr1	75146302	75146323	TTCAGAACCATGGACAGCGCC	-
7.24067	chr7	24068199	24068220	GTCAGCACCAAGGACAGAGCC	+
13.9598	chr13	95979189	95979210	TTCAGCACCGTGGATAGCTCT	-
6.91805	chr6	91805282	91805303	GTCAGTACCCTGGACAGCTCC	+
12.1065	chr12	106516260	106516281	GTCAGCACCATGGACAGAAAC	-
3.14175	chr3	141748962	141748983	ATCAGCACCAAGGACAGAGCA	+
2.2913	chr2	29132165	29132186	TTCAGAACCACGGACAGCTAC	-
12.8744	chr12	87437096	87437117	TTAAGTACCACGGACAGCAAC	+
14.7899	chr14	78991427	78991448	CCCAGCACCATGGACAGTGTC	-
4.13833	chr4	138331877	138331898	GTCAGCACCAAGGAGAGCTCC	+
4.13329	chr4	133292901	133292922	TTCAGCACCAGGGACAGAGCT	-
11.8454	chr11	84541792	84541813	TTCAGCACCATGGACATAGGC	+
12.2942	chr12	29417392	29417413	TTTAGCACCACGGACAGCGCT	+
9.46393	chr9	46393885	46393906	TTCAGCACCACGGACAGCAAC	+
2.16313	chr2	163130815	163130836	TTCAGCACCATGGCCAGAGCC	+
16.815	chr16	81506053	81506074	TTCAGCACCTTGGTCAGCACC	+
8.10923	chr8	109226835	109226856	TCCAGCTCCACGGACAGATGG	+
4.15386	chr4	153862632	153862653	GTCAGCACCATGGACAGAAAC	-
2.24579	chr2	24584091	24584112	GTCAGCACCACGGACAGCTGC	+
15.6875	chr15	68749304	68749325	ATCAGCACCAAGGGCATGGAC	+
16.1041	chr16	10415584	10415605	GTCAGAACCATGGACAGCTCC	+
11.1006	chr11	100575096	100575117	TTCAGCACCCTGGACAGCCGC	-
6.12144	chr6	121438836	121438857	TTCAGCACCACGGTCAGCTCC	-
7.1189	chr7	118903097	118903118	TTCAGCACTAAGGTCTGGACA	+
2.92472	chr2	92472708	92472729	TTCAGCACCCAGGACAGCTCC	+
19.4638	chr19	46380411	46380432	TTCAGCACCTCGCGGAACTCG	-
12.8559	chr12	85588426	85588447	TTCAGAACCGTGGACAGCTCC	+
1.84574	chr1	84575375	84575396	TTCAGCACCAAGGACAAGGGC	-
12.5137	chr12	5137522	5137543	TTCAGGACCTCGGAGAGCGAC	+
11.8213	chr11	82129509	82129530	TTCAGGACCGTGGACAGAGCC	+
2.12722	chr2	127223997	127224018	TTCAGGACCATGAACAGCGAC	+
15.7252	chr15	72517235	72517256	TTCAGCACCACGGAGAGCTCT	-
4.14685	chr4	146845852	146845873	TTCAGCACCAAGGACAGACGC	+
2.33912	chr2	33912778	33912799	GGCAGCACCATGGCCAGAGAC	-
7.81335	chr7	81337805	81337826	TTCAGCACCGTGGACAGCGAG	+
13.779	chr13	77901145	77901166	AGCTGAACCCAGGACAGGAGC	-
7.98314	chr7	98315343	98315364	GTCAGCACTGTGGACAGCTCT	-
14.8547	chr14	85465753	85465774	CTCAGTACCAAGGACAGCGCA	-
9.42402	chr9	42403901	42403922	CTAGGTACCATGGACAGCTCC	-
15.2506	chr15	25062886	25062907	CTCAGGACCAAGGACAGCGAC	-
2.25223	chr2	25226818	25226839	GTTAGCACCAGGGGCAGGGAC	+
10.2577	chr10	25771674	25771695	TTCAGCACCACGGACAGCATA	-
17.2554	chr17	25541310	25541331	AGCAGCACCACGGACAGCTCC	-
Y.1614816	chrY	1619156	1619177	TTCAGCCCCAAAGATGGGACA	+
11.3358	chr11	33580275	33580296	TTCAGTACCACGGACAGCACC	+
19.1047	chr19	10470325	10470346	TTCAGCACCAAGGACAGGGAT	+
7.49778	chr7	49778615	49778636	TTCAGTACCACGGACAGTACC	-
7.37812	chr7	3781675	3781696	TTCAGCACCATGGTCAGAATC	-
1.13743	chr1	137432544	137432565	ATCAGCACCACGGCCGGTCCC	-
12.1121	chr12	112127018	112127039	GTCAGCACCTTGGCCAGCATC	-
2.7036	chr2	70360536	70360557	TTCAGCACCGAGGACAGCGCC	-
19.6052	chr19	60523709	60523730	ATCAGCACCACGGGCAGCTCC	+
5.11398	chr5	113977764	113977785	TTCAGGACCATGGAAAGCTCC	+
14.6352	chr14	63522877	63522898	TTCAGCACCGAAGACAGCACC	-
X.96022247	chrX	96022380	96022401	TTCAGCACCAGGGGCAGTCTT	+
7.30054	chr7	30055566	30055587	TTCAGCACCATGGCCAGCGCC	+
5.12068	chr5	120684802	120684823	TTCAGCACCGCGGACAGCTCC	+
5.27383	chr5	27383387	27383408	TTCAGAACCATGGACAGCTCT	-
7.44299	chr7	44300318	44300339	CTCAGGACCAGGGACAGAGGC	-
2.17963	chr2	179627798	179627819	GTCAGGACCCTGGACAGAGCT	+
4.1547	chr4	154703330	154703351	GTCAGCACCACGGCCAGCGCC	-
18.2564	chr18	25643648	25643669	GTCAGAACTTCGGACAGCTCC	-
7.24854	chr7	24854848	24854869	TTTAGTACCTTGGACAGCAGC	-
2.14323	chr2	143228117	143228138	GTCAGCACCACGGACAGAGCT	+
12.3392	chr12	33923612	33923633	GAAAGTACCAGGGACAGCTCC	+
2.90979	chr2	90980854	90980875	TTCAGCACCAAGGGCAGAGGA	-
4.13039	chr4	130387535	130387556	TTTAGCACCTCGGACAGCTCC	-
4.13619	chr4	136196798	136196819	CCCAGCACCTTGGACAGCGCA	+
9.21697	chr9	21700927	21700948	GTCAGCACCAAGGACAGAGGC	-
6.30983	chr6	30983297	30983318	TTCAGCACCACGGTCAGAGCC	-
3.89243	chr3	89245263	89245284	TTCAGCACCACGGACAGCAAA	+
7.60125	chr7	6014284	6014305	TTCAGCACCAAGGACAGCGTG	+
7.12661	chr7	126616786	126616807	ATCAGCACCACGGACAGGGCC	-
6.31814	chr6	31814093	31814114	CTCAGGACCAAGGACAGCTCC	+
15.7635	chr15	76349511	76349532	TTCAGCACCGCGGCCAGCGCT	+
7.1811	chr7	18110116	18110137	TTCAGCACCAAGGACAGCAGC	-
X.156718850	chrX	156719850	156719871	TTCAGAACCCTGGAGAGCTCC	+
5.37528	chr5	37531818	37531839	TTCAGGACCATGGAGAGTTCC	-
12.8787	chr12	87872729	87872750	GTCAGAACCGAGGACAGCTCC	+
8.87344	chr8	87344847	87344868	TTCAGCACCATGGCCAGCAGC	-
4.12616	chr4	126157873	126157894	CTCAGGACCATGGACAGAGAA	-
6.12046	chr6	120458762	120458783	AGCAGCACCACAGACAGCGCC	+
2.18068	chr2	180685490	180685511	CTCAGCACCTCGGACAGCACC	-
6.48066	chr6	48066627	48066648	TTGCGTACCATGGACAGCTCC	+
10.4707	chr10	4707214	4707235	TTCAGCACCCTAGACAGCTGC	-
7.12453	chr7	124533418	124533439	TTCAGCACCTCGGACAGAGAA	-
5.11485	chr5	114849128	114849149	TTCAGCACCAAGGCCAGCTCC	-
10.6999	chr10	69993771	69993792	TTCAGCACCAAGGACAGACAC	-
5.27366	chr5	27366274	27366295	CTCAGGACCCTGGAGAGCGAC	-
19.373	chr19	37304465	37304486	TTCAGGACCAAGGATAGCAAC	-
6.90817	chr6	90818080	90818101	TTCAGCACTGTGGACAGCAAC	-
18.382	chr18	38201499	38201520	TTCAGGACCATGGAGAGTGCC	+
19.4269	chr19	42690123	42690144	TCCAGTACCCTGGAGAGCTCC	+
10.6041	chr10	60415206	60415227	CTCAGCTCCTAGCATAGAGCC	+
7.3019	chr7	30193180	30193201	TCCAGCACCATGGACAGCGTC	-
4.1248	chr4	124803013	124803034	TTCAGCACCGCGGACAGCAAT	+
5.23865	chr5	23867673	23867694	TTCAGCACCTCGGACAGAGGC	-
13.5476	chr13	54760502	54760523	TTCAGGACCACGGACAGCGCA	+
14.4845	chr14	48447248	48447269	TTCAGCACCGAGGACAGCGGA	+
2.13899	chr2	138990169	138990190	TTCAGCACCAGGGACAGCGTA	-
6.11415	chr6	114152903	114152924	GTCAGGACCCTGGAGAGCGTC	+
1.91613	chr1	91613213	91613234	TTCAGGACCCTGGACAGGGAC	+
11.9689	chr11	96895018	96895039	GCCAGCACCATGGACAGCACA	+
14.3378	chr14	33777536	33777557	GTCAGCACCCTGGACGGCGCC	-
7.10887	chr7	108874416	108874437	ACGAGCCCCGAGGCCAGCGCC	+
9.89535	chr9	89535387	89535408	TTCAGCACTTCGGACAGAGCC	-
2.3824	chr2	38240137	38240158	ATCAGAACCACGGACAGCAAC	+
15.8928	chr15	89281215	89281236	ATCAGCACCCAGTGGAGAACA	+
12.8922	chr12	89222986	89223007	TTCAGCACCACGGAGAGCTCC	-
4.11523	chr4	115226835	115226856	GTCAGCACCATGGACAGCTCC	+
5.26866	chr5	26866537	26866558	CTCAGCACCAAGGACAGCGAC	+
7.12139	chr7	121393037	121393058	TTCAGCACCATGAACAGCACC	+
15.7789	chr15	77893950	77893971	TTCAGCACCTTGGAGAGCTCC	-
6.11385	chr6	113847807	113847828	ACTGGTACCATGGACAGCGCT	+
4.44455	chr4	44455862	44455883	AACAGGACCATGGACAGCGGT	+
6.11325	chr6	113247928	113247949	TTCAGGACCATGGATAGTTCT	+
7.13792	chr7	137922546	137922567	TTCAGGACCACAGACAGCTCC	+
11.1022	chr11	102209541	102209562	CTCAGCACCTCGGAGAGCTCC	+
10.9031	chr10	90310839	90310860	ATCAGAACCTTGGACAGCAAC	+
4.15045	chr4	150448485	150448506	TTCAGAACCAGGGACAGCGCC	-
4.13963	chr4	139630368	139630389	GTCAGCACCACGGACAGCTCC	+
12.3005	chr12	30051498	30051519	TTCAGGACCTTGGCCAGCTCC	-
3.2756	chr3	27561403	27561424	TTCAGCACCTCGGCCAGCGCC	-
11.1	chr11	100019748	100019769	ATCAGCACCACGGAGAGCACC	-
15.8394	chr15	83936864	83936885	TTCAGCACCGTGGACAGCGAC	-
15.2877	chr15	28768300	28768321	CTCAGCACCATGGACAGAGCC	-
11.8324	chr11	83237677	83237698	TTCAGGACCTTGGACAGCGAC	-
12.103	chr12	102956287	102956308	TTCAGCACCTCGGACAGCACC	+
6.11405	chr6	114052887	114052908	TTCAGCACCCTGGAGAGTTCC	+
11.9697	chr11	96968419	96968440	TTAAGAACCGTGGACAGAGGC	+
2.17173	chr2	171733465	171733486	GCTGGTACCACGGACAGCGCC	+
5.11381	chr5	113814449	113814470	GTCAGCACCTGGGACAGCGCC	+
7.12329	chr7	123294668	123294689	GTCAGCACCATGGACAGAGGA	-
17.2574	chr17	25739842	25739863	GCCAGCACCTCGGACAGTTCA	-
13.5477	chr13	54768132	54768153	GTCAGCACCAAGGCCAGAGCG	-
1.95101	chr1	95103109	95103130	GTCAGCACCACGGAGAGCTCC	+
13.5933	chr13	59333251	59333272	CCAAGTACCATGGACAGCTAC	+
18.3834	chr18	38342705	38342726	ATCAGAAGGCTGGACAGCCCC	+
6.48481	chr6	48482615	48482636	GCCACCACCATGGACAGCTCC	-
12.3102	chr12	3102054	3102075	TCCAGCAGAGAGGTCAGGCCC	-
15.8529	chr15	85293129	85293150	ATCAGAACCTTGGACAGCACC	-
2.15828	chr2	158276227	158276248	GTCAGAACCAAGGACAGCGCT	-
9.57858	chr9	57859196	57859217	TTCAGCACCGCGGACAGCAGC	-
7.40534	chr7	40535924	40535945	TTCAGTACTTAGGACAGCTCC	+
11.1156	chr11	115630280	115630301	TTCAGCACCAGTGTGAGCCGG	+
3.85231	chr3	85231683	85231704	TTCAGGACCAAGGACAGTGGT	-
1.50122	chr1	5012986	5013007	GTCAGGACCCTGGAGAGTGCC	-
6.12773	chr6	127733592	127733613	TTCAGCACCAGGGACAGCGCC	-
15.3478	chr15	34780894	34780915	TTCAGACCCTCTGAGGGAGCT	+
18.866	chr18	86605381	86605402	TTCAGTACCTTGGACAGCGAT	+
11.8774	chr11	87737356	87737377	GTCAGCACCATGGACAGCGCA	+
13.2528	chr13	25276686	25276707	TTCAGGACCTTGGAGAGCTCC	-
3.82498	chr3	82498506	82498527	TTCAGCACCATGGACAGCAAC	-
13.5427	chr13	54270069	54270090	CTCAGTACCTTGGATAGCACC	-
5.11383	chr5	113825484	113825505	ATCAGCACCATGGACAGCCAC	-
4.13952	chr4	139521648	139521669	GTCAGCACCAAGGACAGAGGA	-
2.15828	chr2	158283019	158283040	GTCAGCCTCATGGTCAGAGGT	+
7.99522	chr7	99522956	99522977	GTCAGCACGTTGGACAGCGCC	-
10.8088	chr10	80880866	80880887	TTCAGCACCGCGGACAGCGGC	-
4.13618	chr4	136179336	136179357	GTCAGGACCCTGGACAGCTCA	-
11.1149	chr11	114868467	114868488	TTCAGAACCACGGACAGAGAC	-
14.3143	chr14	31426379	31426400	ATCAGGACCTTGGACAGCGGC	-
11.3262	chr11	32618648	32618669	GTCAGAACCAAGGACAGCACC	-
15.8465	chr15	84657360	84657381	GCCAGCACCACGGACAGCACC	-
19.4231	chr19	42309413	42309434	ATCAGCACCGCGGACAGCCCC	+
3.1149	chr3	114896218	114896239	TTCAGCACCTCGGCCAGCACC	+
7.27103	chr7	27105039	27105060	TCCAGCACCACGGACAGTTCC	+
3.88078	chr3	88079587	88079608	TTCAGCACCAGGGACAGCGCC	+
4.10959	chr4	109585968	109585989	TTCAGAACCATGGATAGCTCC	-
9.62948	chr9	62948795	62948816	GGTAGCACCTAGGAGAGATGC	-
15.8468	chr15	84681803	84681824	TTCAGCACCACGAACAGATGC	-
15.2625	chr15	26254583	26254604	TTCAGCACCACGGACAGCGCA	+
2.15177	chr2	151774129	151774150	TTGAGTCCCTAAGACAGGCCC	-
9.28895	chr9	28895536	28895557	TTCAGCACCACGGACAGAAAC	-
1.16154	chr1	161538903	161538924	TTCAGGACCTTGGACAGCTCA	-
18.2589	chr18	25895934	25895955	TTCAGCACCACGGCGACGGAC	+
19.4238	chr19	42379401	42379422	TTCAGCACCCTAGACAGCGAC	-
2.17913	chr2	179130808	179130829	ATAAGCACACAGGACAGGACA	-
5.14023	chr5	140231572	140231593	TTCAGCACCACGGACAGTGTC	+
2.1576	chr2	157604713	157604734	TTCAGCACCACGGACAGCTCC	-
11.3057	chr11	3058840	3058861	CTCAGCACTCAGGGCAGACAC	-
2.16466	chr2	164659853	164659874	TCCAGAACCGTGGACAGCGCC	-
5.14295	chr5	142947405	142947426	TCCAGCACCATGGACAGAGTC	-
1.14787	chr1	147869317	147869338	TTCAGCACCAAAGTCGATGGA	+
8.1777	chr8	17773471	17773492	TTCAGCACCATGGAGAGCTCC	+
16.2848	chr16	28479350	28479371	TTCAGCACCAAGGACAGAGAT	+
5.10669	chr5	106689178	106689199	CCTAGCACCACAGACAGCTCC	-
9.57401	chr9	57404335	57404356	CTAAGTCCCGGGGACAGCTCC	+
11.7231	chr11	72310398	72310419	TTCAGGACCACGGAGAGCGTC	+
8.1407	chr8	14072703	14072724	GTCAGCACCAAGGACAGCACC	+
19.4515	chr19	45151349	45151370	GTCAGGACCAAGGACAGCGTC	-
11.3041	chr11	3043266	3043287	GACAGCACAACAGGCAGCTGC	-
1.34961	chr1	34962209	34962230	ATCAGTACCCCGGACAGCGAC	+
5.28067	chr5	28068070	28068091	ATCAGGACCACAGAGAGCACC	+
9.1051	chr9	105102310	105102331	TTCAGCACCGTGGACAGCTAC	+
17.8771	chr17	87706909	87706930	GTCAGCACCGCGGACAGCGCA	+
10.7642	chr10	76421942	76421963	TGCAGCACCATGGACAGAGAC	-
8.12678	chr8	126777571	126777592	GGCAGCACCACGGCCAGCGCC	+
7.12873	chr7	128729361	128729382	TTCAGCACCCTGGAGAGCAGA	+
15.801	chr15	80105072	80105093	ATCAGCACCACGGACAGCGAC	+
7.13968	chr7	139679184	139679205	GGCAGCACCGCGGACAGTTCC	+
Y.1484782	chrY	1499636	1499657	CTTGGCACCATGAAGAGAGCC	+
17.5587	chr17	55875794	55875815	GGCAGAAGCTGGGAGAGTGTC	+
8.12929	chr8	129290785	129290806	TTCAGCACCTTGGACAGCACT	+
11.7877	chr11	78768844	78768865	CTCAGCACCCTGGATAGCGCC	+
4.12382	chr4	123819581	123819602	TCCTCTACCATGGACAGCACC	-
4.32929	chr4	32929938	32929959	TTCAGCACCCTGGACAGCAAC	-
1.17914	chr1	179145310	179145331	TTCAGAACCTTGGAGAGCACC	+
4.13953	chr4	139531197	139531218	CTCATCACCATGGACAGAGCT	-
7.11049	chr7	110493001	110493022	TTCAGGACCCTGGAGGGCAGC	+
14.1888	chr14	18884383	18884404	TTCAGTACCACGGAGAGTTCC	-
5.28172	chr5	28172515	28172536	AGCGGCACCGTGGACAGCGCC	+
8.97683	chr8	9769231	9769252	TTCAGCACCACGGACAGCGAC	+
1.19416	chr1	194158441	194158462	GTCAGCACCCTGGACAGCTCC	-
9.743	chr9	74300242	74300263	GTCAGGACCATGGACAGAGAA	+
8.81327	chr8	81327624	81327645	TTCAGCACCATGGCCAGTAAC	-
6.11382	chr6	113819776	113819797	ACCAGTGCCAAGGGCAGGACC	-
11.4847	chr11	4849400	4849421	TTCAGCACCACGGACAGCAGC	+
1.17853	chr1	178533953	178533974	TTCAGCACCACGGACAGCTCT	-
7.1441	chr7	144103844	144103865	TTCAGCACCATGGACAGAGGA	-
1.56783	chr1	56783631	56783652	TTCAGTACCATGGACAGGACT	-
13.5498	chr13	54980209	54980230	CTCAGCATCACAGAGAGGCCA	+
4.4172	chr4	41721300	41721321	TTCAGCACCTCGGAGAGCACC	-
8.72017	chr8	72017558	72017579	CCCAGCACTCTGGTCAGCTCC	+
16.9682	chr16	96817029	96817050	TTCAGAACCTTGGTCAGCGCC	-
11.1184	chr11	118401041	118401062	TTCAGCACCAGGGACAGTAAC	-
7.2485	chr7	24850636	24850657	CTCAGCACCTCCTACTGGACC	+
10.8702	chr10	87016690	87016711	GCCAGGACCAAGGACAGCTCC	+
7.33251	chr7	33252276	33252297	CCAAGCTCCATGGACAGCAGC	+
19.4986	chr19	4992551	4992572	TTCAGCACCACGGACAGCGAC	-
4.11968	chr4	119682429	119682450	ATCAGGACCCTGGACAGGGGT	-
17.1115	chr17	11153399	11153420	ATCAGCACCATGGAGAGCAAA	-
Y.1769888	chrY	1775810	1775831	TTCAGCAGCATGTAGGGCACT	-
12.1169	chr12	116928171	116928192	TCAAGGACCTGGGACAGCTCA	+
6.55036	chr6	55038084	55038105	TTCAGCACCACGGACAGCAAA	+
16.5805	chr16	5808682	5808703	TTCAGCACCATGGATAACCAT	+
Y.2719924	chrY	2722507	2722528	TTCAGCAGCCGAGAGAGTTTT	+
15.7246	chr15	72466417	72466438	GTCAGCACCTTGGACAGAGAT	+
8.87359	chr8	87359391	87359412	TGCAGCACCATGGACAGAACC	-
10.1101	chr10	110080802	110080823	ATCAGCACCATGGACAGCAGA	-
4.14707	chr4	147073633	147073654	TTCAGCACCATTGACAGCGAC	-
7.12139	chr7	121387734	121387755	GTCAGCACCATGGACAGCAGG	+
3.1054	chr3	105403491	105403512	TTCAGCACCACGGACAGCACC	-
3.89848	chr3	89850380	89850401	TTCAGCACCACGGACAGCGCT	-
8.11309	chr8	113086025	113086046	ATCAGCACTGCGGACAGCTCC	-
14.741	chr14	74101115	74101136	GCTAGCACCATGGACAGCTGC	+
8.11501	chr8	115014957	115014978	TTCAGGACCATGGACAGAGGC	+
2.31165	chr2	31168302	31168323	TTCAGGACCACGGACAGCAGC	+
13.7036	chr13	70364088	70364109	TTCAGCACCAAGGTCAGTGCC	+
11.7175	chr11	71753483	71753504	TTCAGCACCTGGGACAGCGGC	+
4.12438	chr4	124384784	124384805	TTCAGCACTGCGGACAGTTCC	-
1.92837	chr1	9283730	9283751	GACAGCAGCAGAGGCAGCAGC	+
14.785	chr14	78504016	78504037	GTCAGCACCTCGGACAGGGAC	-
11.3593	chr11	35933796	35933817	TTCAGCACCATGGACAAACCC	+
11.3369	chr11	33687551	33687572	TTCAGGACCATGGTCAGCGCC	+
11.5169	chr11	51687517	51687538	GTCAGGACCCTGGACAGGGCT	-
2.15826	chr2	158261979	158262000	ATCAGAACCATGGACAGCTCA	-
15.8479	chr15	84793531	84793552	GGCAGCACCATGGACAGCTCC	+
10.7912	chr10	79121288	79121309	TTCAGGACCACGGACAGCTCC	+
9.26476	chr9	26477080	26477101	TTCAGCACCAAGGCCAGCACC	-
2.937	chr2	93701002	93701023	GTAAGCACCCTGGACAGCTCC	+
9.10868	chr9	108683140	108683161	TTCAGCACCGTGGGCAGCACT	+
13.1908	chr13	19079911	19079932	TTCAGAACCTTGGACAGCCAC	-
8.81334	chr8	81334456	81334477	TTAAGCACCACGGACAGATCC	-
7.46264	chr7	46265443	46265464	CTCCGCAGCCAGGCCAGCTCC	+
17.283	chr17	28303229	28303250	TTCAGCACCGCGGCCAGCGCC	-
5.33752	chr5	33755199	33755220	GTCAGTACCGCGGACAGCTCC	+
13.1013	chr13	101310969	101310990	GTCGCTACCGCGGACAGCTCC	+
11.3046	chr11	3046471	3046492	CTCAGGACCTCTGAAAGAGCA	-
Y.462099	chrY	465039	465060	CTAAGTACCTAAGACAGAAAC	+
2.92871	chr2	92872678	92872699	TTCAGCACCGCGGACAGCGCC	-
3.19886	chr3	19886779	19886800	TTCAGCACCGCGGACAGCGTC	-
11.8476	chr11	84760317	84760338	TTCAGCACCACAGGGTGGACA	-
5.45817	chr5	45818128	45818149	TTCAGCACCATGGGCAGTTCC	+
4.14714	chr4	147137277	147137298	TTCAGCACCACGGACAGTGAC	+
4.15291	chr4	152914959	152914980	GTTGGTACCAGGGACAGCTCC	-
12.5652	chr12	56518114	56518135	CCCAGCACCGGGGACGTGGTC	-
8.30226	chr8	30226530	30226551	ATCAGCACCGTGGACAGAGGC	+
4.11822	chr4	118219864	118219885	ATCAGGACCAAGGACAGCGCC	+
1.82176	chr1	82177795	82177816	TTCAGGACCATGGACAGCATC	+
2.26028	chr2	26030280	26030301	TTCAGCACCGCGGACAGCGCC	-
11.8455	chr11	84545604	84545625	TTCAGCACCGTGGACAGATCC	-
2.16688	chr2	166880147	166880168	TTCAGCACCGGCGGGAGGAAC	-
15.8771	chr15	87714959	87714980	GAAAGTACCATGGACAGCGTC	-
13.5396	chr13	53955767	53955788	CTCAGCACTAAGGACAGCTCC	+
2.17821	chr2	178206797	178206818	TTCAGCACCACGGACAGTGCT	+
6.85461	chr6	85463997	85464018	TTCAGCACCCTGGACAGCGAC	+
13.5438	chr13	54381348	54381369	TTCAGCACCACAGCGAGCGGG	-
1.16896	chr1	168960421	168960442	CTCAGCACCTTGGACAGCTCA	-
4.14713	chr4	147130669	147130690	GTCAGTACCTCGGACAGCGCA	-
14.1033	chr14	103339702	103339723	TTCAGCACCACGGCCAGCGCA	-
15.7285	chr15	72854168	72854189	CTCAGCACCATGGACAGTGCC	+
9.34587	chr9	34587554	34587575	ATCAGCACCTCGGACAGCTCC	-
14.3598	chr14	35979953	35979974	TTCAGTACCATGGACAGCGTT	+
2.16485	chr2	164851856	164851877	ATCAGCACCAAGGACAGCGCT	+
3.1037	chr3	103703049	103703070	TTCAGCACCGCGGACAGGGAC	+
11.5574	chr11	55741117	55741138	TTCAGCACCACGGACAGCAAC	-
6.10372	chr6	103719889	103719910	TTTGCTACCGTGGACAGCTCT	-
4.41795	chr4	41795650	41795671	TTCAGCACTTTGGAGAGCGCC	+
10.118	chr10	11797226	11797247	ATCAGCACCCAGGACAGCTCC	+
18.6417	chr18	64168120	64168141	ATCAGCACCATGGACAGCGCC	+
2.18124	chr2	181243607	181243628	GCCAGCACCATGGCCAGCACC	-
1.1752	chr1	175198558	175198579	CCCAGCACCATGGAGAGCTCA	+
11.8013	chr11	80128970	80128991	CTCAGCACCCAGGACAGCGGC	-
9.99027	chr9	99027839	99027860	TTCGCCACCATGGACAGCTCC	+
4.13955	chr4	139555719	139555740	GTCAGCACCCTGGACAGCTGC	-
18.2582	chr18	25820658	25820679	ATCAGCACCACGGACAGTGAT	+
14.313	chr14	31296790	31296811	TCCAGCACCACGGACAGTTCC	-
18.3734	chr18	37344299	37344320	TTCAGCACCCCAGATGCGGAC	-
3.78911	chr3	78911613	78911634	GTCAGGACCCTGGACAGATCC	+
2.15377	chr2	153767893	153767914	TTCAGGACCATGGACAGTATA	+
5.11435	chr5	114353295	114353316	CTCAGAAGCCTAGAGAACTCC	+
14.6271	chr14	62712665	62712686	TTCAGGACCACGGCTAGTACC	+
1.15472	chr1	154718624	154718645	TTCAGCACCACCGCCTGTGGA	-
17.6211	chr17	6213023	6213044	TTCAGCACCGCGGACAGATCC	-
4.1468	chr4	146801120	146801141	TTCAGCACCACGGACAGGGCC	+
9.56461	chr9	56462512	56462533	CTCAGTTCCTAGGCCAGGGAA	+
9.11899	chr9	118998490	118998511	GCCAGCACCATGGACAGCGAA	+
13.569	chr13	56905214	56905235	TTCAGCACCACGGAGAGCGGC	-
5.11296	chr5	112959104	112959125	ATCAGCACCATGGACAGCGCA	-
16.238	chr16	23805680	23805701	TTCAGCACCGGGGTCAGCAAC	+
3.80888	chr3	80888915	80888936	TTTAGCACCGCGGACAGCGCT	+
6.1192	chr6	119198849	119198870	TCCAGGACCATGGACAGAAAC	+
12.8212	chr12	82125218	82125239	TGCAGCACCACGGACAGCTCC	-
8.87836	chr8	87837451	87837472	TTCAGCACCGTGGACAGTAGC	-
6.80914	chr6	8092068	8092089	TTCAGAACCATGGACAGTACC	+
6.28929	chr6	28932611	28932632	TTCAGCACCTCGGCGTGGACA	+
15.7794	chr15	77947251	77947272	TTCAGCACCACGGCGACGCAG	-
7.30141	chr7	30143172	30143193	TTCAGCACCACGGAAAGCTCC	+
7.79374	chr7	79375872	79375893	CTCAGCACCATGGCCAGGGCC	+
16.975	chr16	9750282	9750303	GTCAGTACCATGGACAGAGAA	+
5.38766	chr5	38766141	38766162	GGCAGCACCAGGGACAGCTCT	-
10.8015	chr10	80151932	80151953	TTCAGCACCAAGGAGAGCTCC	-
14.2642	chr14	26424224	26424245	TTGAGCACCACATACAGTTCA	-
13.5867	chr13	58673129	58673150	GCCAGCACCATGGACAGCGGA	-
12.9281	chr12	92811242	92811263	TTCAGCACTCAGGACAGCTCC	+
17.2695	chr17	26956321	26956342	GTCAGCACCGCGGACAGCGCC	-
18.3818	chr18	38182506	38182527	TTCAGGACCTTGGCCAGTACC	+
2.13247	chr2	132473234	132473255	TTCAGCACCCCGGACAGCTCC	+
14.6266	chr14	62667410	62667431	TTCAGCACCAAGGACAGAGAT	+
1.37162	chr1	37163114	37163135	TTCAGCACCGTGGGCTGCGGA	-
9.43757	chr9	43758495	43758516	ATCAGTACCATGGACAGGGCA	+
8.12462	chr8	124622489	124622510	TTCAGAACCTTGGAGAGCGCC	+
6.12262	chr6	122625370	122625391	ATCAGCACCTTGGATAGCGTC	+
10.764	chr10	76402100	76402121	TTCAGTACCATGGACAGCGGA	+
X.70120723	chrX	70122256	70122277	GTCAGCACCATGGACAGGAAC	-
17.2719	chr17	27194415	27194436	TTCAGCACCTCGGAGAGCGGC	-
19.2221	chr19	22206448	22206469	TTCAGCACCATGGACAAGGTT	-
3.15475	chr3	154755174	154755195	TTCAGCACCGCGGACAGCTCT	+

## Sheet: Altered Spacer
PET ID	Chromosome	Left Motif Start	Left Motif End	Left Sequence	Left Direction	Chromosome	Right Motif Start	Right Motif End	Right Sequence	Right Direction	Spacer
1.79318	chr1	79319048	79319057	TTCAGCACC	+	chr1	79319057	79319067	GGACAGCTCC	+	0
11.1185	chr11	118501720	118501729	TTCAGCACC	-	chr11	118501710	118501720	GGACAGCTCC	-	0
11.1077	chr11	107736391	107736400	GTCAGCACC	+	chr11	107736401	107736411	GGACAGCTCC	+	1
11.594	chr11	59400935	59400944	TTCAGCACC	-	chr11	59400924	59400934	GGACAGCGCC	-	1
10.728	chr10	7280024	7280033	ATCAGCACC	-	chr10	7280007	7280017	GGACAGCGGC	-	7
19.5087	chr19	5087994	5088003	TTCAGCACC	+	chr19	5088010	5088020	GGACAGCACC	+	7
8.12732	chr8	127320816	127320825	TTCAGAACC	-	chr8	127320799	127320809	GGACAGCTCC	-	7
11.1058	chr11	105824051	105824060	TTCAGCACC	+	chr11	105824067	105824077	GGACAGCTCC	+	7
5.10879	chr5	108789971	108789980	TTCAGCACC	+	chr5	108789987	108789997	GGACAGCGCC	+	7
9.10651	chr9	106514443	106514452	TTCAGCACC	-	chr9	106514426	106514436	GGACAGCTCC	-	7
17.3241	chr17	32413444	32413453	TTCAGCACC	-	chr17	32413427	32413437	GGACAGCACT	-	7
2.32566	chr2	32566467	32566476	ATCAGCACC	-	chr2	32566449	32566459	GGACAGCGGC	-	8
3.33334	chr3	33334603	33334612	CTCAGCACC	-	chr3	33334585	33334595	GGACAGCTCC	-	8
15.7378	chr15	73784880	73784889	TTCAGCACC	+	chr15	73784897	73784907	GGACAGCTCC	+	8
9.75469	chr9	75469869	75469878	TTCAGCACC	-	chr9	75469851	75469861	GGACAGCGCC	-	8
5.11306	chr5	113064858	113064867	TTCAGCACC	+	chr5	113064875	113064885	GGACAGCTCC	+	8
15.88	chr15	88002267	88002276	TTCAGCACC	+	chr15	88002284	88002294	GGACAGCTCC	+	8
7.1347	chr7	134702729	134702738	ATCAGCACC	-	chr7	134702711	134702721	GGACAGCTCC	-	8
10.1146	chr10	114589115	114589124	TTCAGCACC	-	chr10	114589097	114589107	GGACAGCGCC	-	8
4.13971	chr4	139712165	139712174	TTCAGCACC	-	chr4	139712146	139712156	GGACAGCTCC	-	9
5.13778	chr5	137783370	137783379	ATCAGCACC	-	chr5	137783351	137783361	GGACAGCTCC	-	9
2.94046	chr2	94046376	94046385	TTCAGCACC	+	chr2	94046394	94046404	GGACAGCTAC	+	9
5.11599	chr5	115992514	115992523	TTCAGCACC	-	chr5	115992495	115992505	GGACAGCGCC	-	9
12.871	chr12	87102378	87102387	TTCAGCACC	-	chr12	87102359	87102369	GGACAGCTCC	-	9
12.2501	chr12	25014229	25014238	TTCAGCACC	-	chr12	25014210	25014220	GGACAGCAAC	-	9
1.664	chr1	66401369	66401378	TTCAGCACC	-	chr1	66401350	66401360	GGACAGCGGC	-	9
18.7705	chr18	77051990	77051999	TTCAGCACC	+	chr18	77052008	77052018	GGACAGCGAC	+	9
1.25173	chr1	25173328	25173337	TTCAGCACC	-	chr1	25173309	25173319	GGACAGCTCT	-	9
8.96359	chr8	96359029	96359038	TTCAGCACC	+	chr8	96359047	96359057	GGACAGCAAC	+	9
8.12768	chr8	127679487	127679496	TTCAGCACC	-	chr8	127679467	127679477	GGACAGCGCC	-	10
4.44724	chr4	44725567	44725576	TTCAGGACC	+	chr4	44725586	44725596	GGACAGCGCC	+	10
10.2884	chr10	28836440	28836449	TTCAGCACC	-	chr10	28836419	28836429	GGACAGCTCC	-	11
3.62682	chr3	62682985	62682994	ATCAGCACC	-	chr3	62682964	62682974	GGACAGCGCC	-	11
5.30864	chr5	30864686	30864695	TTCAGCACC	-	chr5	30864525	30864535	GGACAGAGGC	-	151
7.34924	chr7	34924204	34924213	TCCAGCACC	-	chr7	34923905	34923915	GGACAGCGGC	-	289
Y.1715104	chrY	1724888	1724897	CTCAGCACC	+	chrY	1725349	1725359	GGACAGCTCC	+	452
Y.1638963	chrY	1644265	1644274	TTCAGCACC	-	chrY	1643771	1643781	GGACAGAGCT	-	484
Y.1201360	chrY	1204339	1204348	CTCAGCACC	+	chrY	1204909	1204919	GGACAGCATC	+	561
2.1137	chr2	113705542	113705551	CTCAGCACC	-	chr2	113703473	113703483	GGACAGCTCC	-	2059
2.15867	chr2	158674700	158674709	TTCAGAACC	+	chr2	158677393	158677403	GGACAGCTCC	+	2684

## Sheet: Left Half-Site
PET ID	Chromosome	Motif Start	Motif End	Sequence	Direction
Y.1305075	chrY	1319478	1319487	TTCAGCACC	-
9.35053	chr9	35053739	35053748	CTCAGCACC	+
18.813	chr18	81296199	81296208	GTCAGCACC	-
Y.81771	chrY	83286	83295	CTCAGCACC	+
Y.337898	chrY	342977	342986	CTCAGCACC	+
6.13855	chr6	138547690	138547699	TTCAGCACC	+
Y.987316	chrY	988566	988575	GTCAGCACC	-
Y.640524	chrY	647443	647452	TCCAGCACC	-
11.3065	chr11	3066732	3066741	TCCAGCACC	+
Y.734760	chrY	739323	739332	CTCAGCACC	+
12.7572	chr12	75718965	75718974	CTCAGCACC	-
11.3075	chr11	3076511	3076520	GTCAGCACC	+
10.1297	chr10	129680666	129680675	TTCAGGACC	+
11.1152	chr11	115152402	115152411	TTCAGCACC	-
2.9813	chr2	98131076	98131085	TTCAGCACC	-
15.3903	chr15	39029458	39029467	TTCAGCACC	+
19.9559	chr19	9565213	9565222	TCCAGCACC	+
Y.1821356	chrY	1821759	1821768	TTCAGGACC	+
Y.1503522	chrY	1510698	1510707	TCCAGCACC	+
9.53468	chr9	53468562	53468571	TTCAGCACC	+
Y.1132639	chrY	1134307	1134316	CTCAGCACC	-
7.31164	chr7	31164726	31164735	TTCAGCACC	-
Y.110662	chrY	116126	116135	CTCAGCACC	+
Y.49950	chrY	54060	54069	CTCAGCACC	+
Y.2592870	chrY	2596565	2596574	CTCAGCACC	+
Y.1516319	chrY	1530804	1530813	CTCAGCACC	+

## Sheet: Right Half-Site
PET ID	Chromosome	Motif Start	Motif End	Sequence	Direction
17.5062	chr17	50624440	50624450	GGACAGCTCT	-
Y.64669	chrY	66061	66071	GGACAGCAGC	-
7.91142	chr7	91143157	91143167	GGACAGCTCC	+
11.8043	chr11	80429915	80429925	GGACAGCTCC	+
16.909	chr16	90900458	90900468	GGACAGCTCT	-
2.17193	chr2	171932440	171932450	GGACAGCTCC	-
16.1142	chr16	11424577	11424587	GGACAGCTCC	-
12.799	chr12	79903030	79903040	GGACAGCTGC	+
10.1118	chr10	111827623	111827633	GGACAGCGAC	+
16.952	chr16	95202709	95202719	GGACAGCAGC	-
14.6244	chr14	62443563	62443573	GGACAGCGCC	-
8.12622	chr8	126218925	126218935	GGACAGCTCC	-
10.8044	chr10	80440655	80440665	GGACAGCTCC	-
Y.879134	chrY	880907	880917	GGACAGCTTC	-
6.55349	chr6	55349805	55349815	GGACAGCTCC	-
9.10805	chr9	108048232	108048242	GGACAGCTCC	-
Y.741235	chrY	744496	744506	GGACAGCATC	+
3.1532	chr3	153204972	153204982	GGACAGCTCC	+
Y.655857	chrY	657203	657213	GGACAGAGAC	+
13.1102	chr13	110237081	110237091	GGACAGCTCC	-
17.1488	chr17	14884712	14884722	GGACAGCAGC	+
2.16479	chr2	164794293	164794303	GGACAGCTCC	+
1.93573	chr1	93573494	93573504	GGACAGCTCC	+
8.11483	chr8	114828061	114828071	GGACAGCACC	-
11.3084	chr11	3085448	3085458	GGACAGGAGC	-
5.13609	chr5	136091502	136091512	GGACAGCGCA	-
6.89208	chr6	89208183	89208193	GGACAGCTCC	+
18.7319	chr18	7319252	7319262	GGACAGCGGC	+
7.74895	chr7	74895681	74895691	GGAGAGCGCC	-
5.29286	chr5	29286013	29286023	GGACAGCTCC	+
10.9081	chr10	90814263	90814273	GGACAGCTCC	-
19.1702	chr19	17022874	17022884	GGACAGCGCC	-
11.3061	chr11	3062433	3062443	GGACAGAGGC	-
5.12134	chr5	121339317	121339327	GGACAGCTCC	-
18.8255	chr18	82553436	82553446	GGACAGCGGC	-

## Sheet: Flipped Orientation
PET ID	Chromosome	Left Motif Start	Left Motif End	Left Sequence	Left Direction	Chromosome	Right Motif Start	Right Motif End	Right Sequence	Right Direction	Spacer
14.635	chr14	63501083	63501092	ATCAGCACC	+	chr14	63501054	63501064	GGACAGCTCC	+	19
10.1267	chr10	126659905	126659914	ATCAGCACC	+	chr10	126659825	126659835	GGACAGGACC	+	70
13.1114	chr13	111401019	111401028	ATCAGCACC	+	chr13	111400925	111400935	GGACAGCGCT	+	84
2.21285	chr2	21286540	21286549	TTCAGCACC	+	chr2	21285216	21285226	GGACAGCTCC	+	1314
Y.1025602	chrY	1029701	1029710	CTCAGCACC	+	chrY	1027782	1027792	GGACAGGTCC	+	1909
Y.1036295	chrY	1054835	1054844	CTCAGCACC	-	chrY	1057041	1057051	GGACAGCTTC	-	2197
M.34	chrM	3976	3985	TCCAGCACC	+	chrM	1535	1545	GGACAGCTCT	+	2431
Y.1445357	chrY	1450070	1450079	TTCAGCACC	-	chrY	1453081	1453091	GGACAGCAGC	-	3002

## Sheet: Convergent&Divergent
PET ID	Chromosome	Left Motif Start	Left Motif End	Left Sequence	Left Direction	Chromosome	Right Motif Start	Right Motif End	Right Sequence	Right Direction	Spacer	Orientation
14.7419	chr14	74189038	74189047	TTCAGGACC	+	chr14	74189028	74189038	GGACAGCTCC	-	0	diverge
12.3011	chr12	30116721	30116730	TTCAGCACC	+	chr12	30116731	30116741	GGACAGCTCC	-	1	converge
7.25015	chr7	25015270	25015279	TTCAGCACC	-	chr7	25015280	25015290	GGACAGCACC	+	1	diverge
12.4757	chr12	47572880	47572889	TTCAGCACC	-	chr12	47572890	47572900	GGACAGCTCC	+	1	diverge
7.24717	chr7	24717620	24717629	TTCAGCACC	-	chr7	24717630	24717640	GGACAGCTCC	+	1	diverge
2.18107	chr2	181066541	181066550	TTCAGCACC	+	chr2	181066530	181066540	GGACAGCGCC	-	1	diverge
3.55099	chr3	55099806	55099815	TTCAGCACC	-	chr3	55099817	55099827	GGACAGCTCC	+	2	diverge
9.12255	chr9	122550666	122550675	TTCAGCACC	-	chr9	122550358	122550368	GGACAGGGTC	+	298	converge
9.44633	chr9	44633837	44633846	TTCAGCACC	-	chr9	44633206	44633216	GGACAGGGCC	+	621	converge
Y.1816387	chrY	1818655	1818664	TTCAGGACC	-	chrY	1819954	1819964	GGACAGCACC	+	1290	diverge
Y.280873	chrY	288091	288100	CTCAGCACC	-	chrY	286306	286316	GGACAGGGAC	+	1775	converge
Y.537919	chrY	541191	541200	TCCAGCACC	-	chrY	539082	539092	GGACAGATCC	+	2099	converge
14.182	chr14	18207727	18207736	ATCAGCACC	+	chr14	18203977	18203987	GGACAGGGCT	-	3740	diverge
Y.1394258	chrY	1410321	1410330	CTCAGCACC	+	chrY	1394801	1394811	GGACAGCAGC	-	15510	diverge

## Sheet: No RE1 Motif
PET ID	Chromosome	Region Start	Region End
11.1117	chr11	111708939	111712247
11.3	chr11	3000024	3005279
11.307	chr11	3070174	3073529
11.3079	chr11	3079169	3080117
11.3081	chr11	3080752	3083703
11.3087	chr11	3086935	3088170
11.3092	chr11	3091922	3093313
11.3093	chr11	3093461	3094887
11.778	chr11	77796001	77797459
14.3919	chr14	39187502	39192201
19.2342	chr19	23424561	23424657
19.3184	chr19	31839580	31840625
2.11264	chr2	112643419	112645230
2.98461	chr2	98461163	98468172
3.76	chr3	76000080	76001102
4.30167	chr4	3016691	3018297
5.3	chr5	3000037	3002576
6.10361	chr6	103614839	103615066
7.76397	chr7	76397309	76398219
8.24561	chr8	24560860	24561346
9.10555	chr9	105551577	105552561
9.24292	chr9	24292423	24292569
9.3	chr9	3000047	3038400
9.34691	chr9	34690830	34692190
M.10652	chrM	10652	16287
X.119118527	chrX	119118527	119120946
X.120310036	chrX	120310036	120312007
X.71896323	chrX	71896323	71904743
X.71913552	chrX	71913552	71924752
Y.1117751	chrY	1117751	1123614
Y.1124702	chrY	1124702	1131654
Y.1148663	chrY	1148663	1150242
Y.1216981	chrY	1216981	1222462
Y.1241564	chrY	1241564	1242335
Y.1280946	chrY	1280946	1281690
Y.1330189	chrY	1330189	1331268
Y.1480849	chrY	1480849	1483791
Y.2033332	chrY	2033332	2040236
Y.2701764	chrY	2701764	2713239
Y.299784	chrY	299784	300800
Y.630012	chrY	630012	638143
Y.962510	chrY	962510	967795
