# Supplementary material for: REST Regulates Distinct Transcriptional Networks in Embryonic and Neural Stem Cells
Source: PLoS Biol. 2008 Oct 28;6(10):e256. doi: 10.1371/journal.pbio.0060256 (PMC2573930; doi:10.1371/journal.pbio.0060256)
Supplement: Dataset S4 — (750 KB XLS) [file pbio.0060256.sd004.xls]

## Sheet: E14 ChIP-PET 5+
ChIP-PET ID	PET Overlap Count	Binding Location	Nearest Left Target Gene	Nearest Left Target ID	Nearest Left Target Distance	Annotation to Nearest Left Target	Nearest Right Target Gene	Nearest Right Target ID	Nearest Right Target Distance	Annotation to Nearest Right Target
1.10465	5	chr1:104652722-104652850	AK014872	AK014872	4313000	intergenic	Cdh20	NM_011800	1943578	intergenic
1.10797	5	chr1:107970137-107970196	Tnfrsf11a	AK138990	297169	intergenic	Bcl2	BC095964	399122	intergenic
1.10858	5	chr1:108583886-108584076	BC023820	BC023820	901	1st intron	BC023820	BC023820	3108	1st intron
1.12231	5	chr1:122308535-122308870	Marco	NM_010766	1768	Intronic	Marco	NM_010766	3467	Intronic
1.13299	5	chr1:132990918-132990937	Lgtn	AK036154	1979	Intronic	Lgtn	AK036154	137	Intronic
1.13396	5	chr1:133961024-133961234	Pctk3	NM_008795	11123	1st intron	Pctk3	NM_008795	5825	1st intron
1.15467	5	chr1:154665239-154665258	9430023P16Rik	BC086651	384	5'	Nmnat2	NM_175460	52069	5'
1.1578	5	chr1:157797754-157797911	Tor1aip1	AK149727	1814	1st intron	Tor1aip1	AK149727	142	1st intron
1.15888	5	chr1:158879151-158879315	Ralgps2	AK036803	102954	intergenic	AK132966	AK132966	989	5'
1.1596	5	chr1:159604907-159605204	Lztr2	NM_033354	199956	intergenic	6430517E21Rik	NM_207583	476891	intergenic
1.16435	5	chr1:164345492-164345528	Dnm3	NM_172646	30801	5'	5630401D24Rik	NM_144877	24837	3'
1.16692	5	chr1:166919243-166919307	Xcl1	NM_008510	147090	intergenic	Tbx19	NM_032005	55253	3'
1.16697	5	chr1:166967328-166967386	Xcl1	NM_008510	195172	intergenic	Tbx19	NM_032005	7171	3'
1.16824	5	chr1:168245434-168245646	Pogk	BC072587	333	1st intron	Pogk	NM_175170	131	Intronic
1.16896	5	chr1:168960397-168960535	C030014K22Rik	NM_175461	32784	3'	Uck2	NM_030724	102295	intergenic
1.17733	5	chr1:177328602-177328743	Rgs7	NM_011880	821	1st intron	Rgs7	NM_011880	262	1st intron
1.18229	5	chr1:182295499-182295535	AK038867	AK038867	24712	5'	Parp1	NM_007415	110131	intergenic
1.18231	5	chr1:182308300-182308463	AK038867	AK038867	37576	5'	Parp1	NM_007415	97267	5'
1.19464	5	chr1:194636512-194636517	Syt14	NM_181546	2405	Intronic	Syt14	NM_181546	44554	Intronic
1.25775	5	chr1:25775229-25775267	Bai3	BC099951	1020	5'	4931408C20Rik	NM_001033764	851110	intergenic
1.3496	5	chr1:34961993-34962054	Plekhb2	AK166091	137900	intergenic	Hs6st1	BC052316	1050921	intergenic
1.36265	5	chr1:36267022-36267087	Arid5a	AK156376	0	intragenic	Arid5a	AK156376	0	intragenic
1.43691	5	chr1:43691953-43692256	1500015O10Rik	NM_024283	5016	3'	Uxs1	NM_026430	1728	3'
1.53651	5	chr1:53651191-53651386	2210409M21Rik	AK168534	353991	intergenic	Stk17b	NM_133810	48769	3'
1.56783	5	chr1:56783712-56783783	Satb2	AK129270	7566	Intronic	Satb2	AK129270	6372	Intronic
1.58559	5	chr1:58560705-58560907	Ndufb3	NM_025597	20312	3'	Als2cr12	NM_175370	41859	3'
1.6405	5	chr1:64050083-64050236	Klf7	AK149362	36549	Intronic	Klf7	AK149362	5015	Intronic
1.67195	5	chr1:6721946-6722019	St18	NM_173868	1661	1st intron	St18	NM_173868	5677	1st intron
1.70659	5	chr1:70658941-70659150	A830006F12Rik	NM_177164	0	1st exon	A830006F12Rik	NM_177164	0	1st exon
1.74325	5	chr1:74327183-74327311	Ctdsp1	NM_153088	0	intragenic	Ctdsp1	NM_153088	0	intragenic
1.77356	5	chr1:77356935-77357127	Epha4	NM_007936	28863	Intronic	Epha4	NM_007936	32663	Intronic
2.1016	5	chr2:101597363-101597532	2600010E01Rik	NM_175181	24200	1st intron	2600010E01Rik	NM_175181	862	1st intron
2.11227	5	chr2:112278327-112278561	2900064A13Rik	NM_133749	10169	3'	Aven	NM_028844	15357	5'
2.12472	5	chr2:124723248-124723309	Sema6d	NM_172537	364068	intergenic	Slc24a5	BC094232	36328	5'
2.12879	5	chr2:128792349-128792413	Ttl	NM_027192	7193	3'	Rpo1-2	NM_009086	99	5'
2.13164	5	chr2:131645581-131645920	Prnd	NM_023043	0	intragenic	Prnd	NM_023043	0	intragenic
2.13227	5	chr2:132267456-132267529	2310032D16Rik	AK165952	3797	1st intron	2310032D16Rik	AK165952	2015	1st intron
2.13329	5	chr2:133288281-133288365	Bmp2	NM_007553	33999	3'	Hao1	NM_010403	900478	intergenic
2.1429	5	chr2:142898689-142898961	Otor	NM_020595	125687	intergenic	Pcsk2	NM_008792	338793	intergenic
2.14791	5	chr2:147908770-147908812	Foxa2	NM_010446	170381	intergenic	Sstr4	NM_009219	177992	intergenic
2.14841	5	chr2:148414263-148414331	Napb	NM_019632	10102	1st intron	Napb	NM_019632	9408	1st intron
2.15713	5	chr2:157128598-157128599	Src	NM_009271	12743	1st intron	Src	NM_009271	2042	1st intron
2.16284	5	chr2:162837635-162837673	2410116G06Rik	NM_026630	56612	5'	Jph2	NM_021566	191559	intergenic
2.16417	5	chr2:164168030-164168065	AK007294	AK007294	3118	5'	D2Bwg0891e	NM_026797	9473	5'
2.16457	5	chr2:164570081-164570091	Pltp	NM_011125	21173	5'	F730014I05Rik	NM_146129	485	5'
2.16473	5	chr2:164725411-164725432	Ncoa5	NM_144892	11004	1st intron	Ncoa5	NM_144892	465	1st intron
2.1663	5	chr2:166300974-166301008	AK173168	AK173168	0	intragenic	AK173168	AK173168	0	intragenic
2.16647	5	chr2:166471995-166472029	AK173168	AK173168	66975	5'	Trp53rk	AK077074	11722	5'
2.16912	5	chr2:16912124-16912238	Plxdc2	NM_026162	242312	intergenic	Nebl	NM_028757	352305	intergenic
2.17019	5	chr2:170187075-170187219	Cyp24a1	NM_009996	525	Intronic	Cyp24a1	NM_009996	230	Intronic
2.17039	5	chr2:170387199-170387249	4930470P17Rik	NM_026287	94002	5'	Dok5	BC066822	35786	5'
2.1722	5	chr2:172199983-172200145	AK006503	AK006503	34565	3'	Tcfap2c	NM_009335	40753	5'
2.17228	5	chr2:172281183-172281311	Tcfap2c	AK145603	31423	3'	Bmp7	NM_007557	231378	intergenic
2.17424	5	chr2:174238065-174238125	2310042G06Rik	NM_025531	122215	intergenic	Edn3	NM_007903	165615	intergenic
2.17826	5	chr2:178259520-178259590	Phactr3	NM_028806	1954	Intronic	Phactr3	NM_028806	1431	Intronic
2.17924	5	chr2:179237553-179237623	Cdh26	AK132328	820816	intergenic	4930591A17Rik	NM_026596	106754	intergenic
2.18185	5	chr2:181847305-181847354	Polr3k	NM_025901	47760	3'	N.A.	N.A.	N.A.	N.A.
2.18186	5	chr2:181860176-181860188	Polr3k	NM_025901	60613	3'	N.A.	N.A.	N.A.	N.A.
2.20548	5	chr2:20549592-20549758	BC050016	BC050016	101679	Intronic	BC050016	BC050016	29975	Intronic
2.2287	5	chr2:22872025-22872095	Pdss1	AK012307	104201	intergenic	Acbd5	AK147839	19023	5'
2.25033	5	chr2:25033333-25033488	A730008L03Rik	NM_021393	20	5'	AK029738	AK029738	1359	3'
2.25153	5	chr2:25154064-25154106	Grin1	AK158175	12952	5'	Man1b1	NM_001029983	678	5'
2.28407	5	chr2:28407058-28407128	Gtf3c5	NM_148928	1838	5'	Gfi1b	NM_008114	24372	3'
2.29413	5	chr2:29415518-29415560	Crsp8	BC016537	68742	3'	Rapgef1	NM_001039087	26188	5'
2.30775	5	chr2:30775725-30775795	Tor1b	NM_133673	0	intragenic	Tor1b	NM_133673	0	intragenic
2.31461	5	chr2:31462382-31462409	Fubp3	NM_001033389	22867	3'	Exosc2	NM_144886	30348	5'
2.32125	5	chr2:32126005-32126053	BC011407	BC011407	99	Intronic	BC011407	BC011407	120	Intronic
2.3216	5	chr2:32161983-32162255	Dnm1	AK144142	0	intragenic	Dnm1	AK144142	0	intragenic
2.34241	5	chr2:34242442-34242626	Pbx3	NM_016768	48489	5'	Mapkap1	NM_177345	11498	5'
2.35664	5	chr2:35665915-35665937	AK016577	AK016577	48315	Intronic	AK136337	AK136337	276	5'
2.49744	5	chr2:49744012-49744099	2310010M24Rik	NM_027990	18594	Intronic	2310010M24Rik	NM_027990	8877	Intronic
2.54255	5	chr2:54256067-54256232	Galnt13	AK038387	4034	1st intron	Galnt13	AK038387	36883	1st intron
2.64638	5	chr2:6464567-6464717	Cugbp2	AK151818	157	Intronic	Cugbp2	AK151818	2460	Intronic
2.64673	5	chr2:64674706-64674808	Fign	BC059266	775880	intergenic	Grb14	NM_016719	38561	3'
2.93703	5	chr2:93705116-93705248	Gm1967	AK135828	35240	5'	Gm1967	AK163963	25921	1st intron
2.93812	5	chr2:93811695-93811747	BC018196	BC018196	152	5'	Hsd17b12	NM_019657	21815	3'
2.94038	5	chr2:94041477-94041574	Hsd17b12	NM_019657	82777	5'	BC061503	BC061503	60085	3'
3.10153	5	chr3:101534346-101534349	Igsf3	NM_207205	26794	1st intron	Igsf3	NM_207205	20163	1st intron
3.10561	5	chr3:105614673-105614829	Kcnd3	NM_001039347	26774	Intronic	Kcnd3	NM_001039347	171914	Intronic
3.10581	5	chr3:105815162-105815255	Ddx20	NM_017397	0	1st exon	Ddx20	AF217001	0	1st exon
3.12262	5	chr3:122621841-122621841	Fnbp1l	NM_153118	61053	5'	Pde5a	NM_153422	99366	5'
3.14187	5	chr3:141870465-141870657	Bmpr1b	AK140158	1666	5'	Bmpr1b	NM_007560	48745	1st intron
3.14712	5	chr3:147119151-147119360	AK014905	AK014905	241613	intergenic	AK142828	AK142828	1707070	intergenic
3.14882	5	chr3:148821667-148821714	AK014905	AK014905	1944048	intergenic	AK142828	AK142828	4635	3'
3.15463	5	chr3:154632870-154632988	Cryz	NM_009968	74456	3'	1700013E18Rik	NM_175176	13495	5'
3.21892	5	chr3:21893465-21893546	Agtr1b	NM_175086	1335255	intergenic	Tbl1xr1	NM_030732	374350	intergenic
3.27154	5	chr3:27154927-27154958	Spata16	NM_027583	36390	3'	Spata16	NM_029150	19049	Intronic
3.36979	5	chr3:36979734-36980019	Trpc3	NM_019510	116724	intergenic	AK028716	AK028716	76140	5'
3.68152	5	chr3:68152762-68152924	D230050A05	NM_177585	8321	3'	AK147301	AK147301	342867	intergenic
3.79756	5	chr3:79756535-79756556	AK137776	AK137776	36752	3'	5730537D05Rik	NM_027495	142533	intergenic
3.81362	5	chr3:81362895-81363031	Pdgfc	NM_019971	63006	3'	AK045605	AK045605	644230	intergenic
3.82498	5	chr3:82498469-82498532	Gucy1a3	NM_021896	267500	intergenic	Npy2r	BC104733	127375	intergenic
3.83214	5	chr3:83215678-83215818	AK140333	AK140333	575	5'	Sfrp2	NM_009144	636498	intergenic
3.85231	5	chr3:85231739-85231792	Fbxw7	NM_080428	168215	intergenic	Pet112l	AK166231	428279	intergenic
3.88445	5	chr3:88446339-88446504	AK129286	AK129286	89	Intronic	AK129286	AK129286	258	Intronic
3.95991	5	chr3:95991758-95991884	Car14	AK009805	1732	5'	Anp32e	AK088401	22860	5'
3.97488	5	chr3:97488839-97488881	Bcl9	NM_029933	186948	intergenic	Chd1l	NM_026539	157291	intergenic
4.10473	5	chr4:104728344-104728358	Ppap2b	NM_080555	10915	Intronic	Ppap2b	NM_080555	476	Intronic
4.10621	5	chr4:106211718-106211789	Ttc4	NM_028209	34939	5'	BC026682	NM_146149	20092	5'
4.10954	5	chr4:109541954-109542173	Dmrta2	NM_172296	60447	3'	Elavl4	NM_010488	159605	intergenic
4.11737	5	chr4:117367190-117367325	BC086615	BC086615	0	intragenic	BC086615	BC086615	0	intragenic
4.11755	5	chr4:117546009-117546178	St3gal3	AK013016	16279	Intronic	St3gal3	NM_009176	6487	Intronic
4.11953	5	chr4:119534633-119534665	Guca2b	NM_008191	377772	intergenic	Edn2	BC037042	124190	intergenic
4.1206	5	chr4:120595890-120595940	Zmpste24	NM_172700	39	5'	LOC545677	NM_001033791	218034	intergenic
4.12398	5	chr4:123981713-123981780	Rragc	BC071245	542453	intergenic	AK160260	AK160260	89745	5'
4.12582	5	chr4:125818834-125818908	Adprhl2	NM_133883	0	intragenic	Adprhl2	BC045203	0	intragenic
4.127	5	chr4:127006024-127006200	Gjb5	NM_010291	145644	intergenic	Hmgb4	NM_027036	756403	intergenic
4.12775	5	chr4:127751196-127751290	Gjb5	NM_010291	890775	intergenic	Hmgb4	NM_027036	11272	3'
4.13049	5	chr4:130492858-130492928	Matn1	NM_010769	265342	intergenic	Ptpru	NM_011214	547639	intergenic
4.13175	5	chr4:131748050-131748180	Med18	NM_026039	12193	5'	Sesn2	NM_144907	16772	3'
4.13231	5	chr4:132309914-132310010	Ahdc1	NM_146155	25599	Intronic	Ahdc1	NM_146155	17125	Intronic
4.13295	5	chr4:132947747-132947893	Pigv	AK148285	3109	5'	Arid1a	NM_033566	3264	3'
4.13302	5	chr4:133024158-133024343	Arid1a	BC082554	29123	1st intron	Arid1a	BC082554	4219	1st intron
4.13376	5	chr4:133762992-133763280	Stmn1	NM_019641	17222	3'	Paqr7	NM_027995	5916	5'
4.13738	5	chr4:137380419-137380483	Eif4g3	NM_172703	2939	Intronic	Eif4g3	AK046639	6776	Intronic
4.13772	5	chr4:137722360-137722390	0610009K11Rik	NM_026689	8034	3'	AY523601	AY523601	4885	5'
4.13861	5	chr4:138615344-138615369	Akr7a5	NM_025337	24855	3'	2610012O22Rik	BC096556	4159	3'
4.14133	5	chr4:141336566-141336587	Tmem51	NM_145402	26567	1st intron	Tmem51	NM_145402	19560	1st intron
4.14238	5	chr4:142382539-142382775	9030409G11Rik	AK052809	871180	intergenic	Pdpn	BC026551	151459	intergenic
4.14542	5	chr4:145420364-145420432	Rex2	BC096593	449276	intergenic	LOC627585	NM_001039233	84216	5'
4.14729	5	chr4:147288552-147288564	Ubiad1	NM_027873	7	5'	Frap1	NM_020009	3847	5'
4.14829	5	chr4:148294595-148294677	Rbp7	NM_022020	913	Intronic	Rbp7	NM_022020	2011	Intronic
4.14878	5	chr4:148785451-148785566	Spsb1	NM_029035	34451	1st intron	Spsb1	NM_029035	13143	1st intron
4.15311	5	chr4:153106180-153106457	Wdr8	AK172690	94255	3'	BC039980	BC039980	2095	5'
4.15336	5	chr4:153356705-153356913	Prdm16	BC053082	36320	Intronic	Prdm16	BC053082	15571	Intronic
4.15455	5	chr4:154549111-154549166	Ssu72	NM_026899	0	1st exon	Ssu72	NM_026899	0	1st exon
4.23663	5	chr4:23663778-23663941	Pou3f2	X66602	1084726	intergenic	F730047E07Rik	BC094429	924659	intergenic
4.31564	5	chr4:31564490-31564519	Epha7	NM_010141	2430638	intergenic	Map3k7	BC006665	728223	intergenic
4.41795	5	chr4:41795620-41795692	Dnaic1	NM_175138	1155	Intronic	Dnaic1	NM_175138	3218	Intronic
4.58673	5	chr4:58674238-58674244	Edg2	BC025425	26995	5'	AI314180	NM_172381	219844	intergenic
4.62767	5	chr4:62767700-62767872	Kif12	NM_010616	109294	intergenic	Orm1	NM_008768	63139	5'
4.65468	5	chr4:65469254-65469320	Astn2	AF116573	32632	Intronic	Astn2	AF116573	9360	Intronic
4.77682	5	chr4:77683264-77683422	Ptprd	AK034145	217	5'	Tyrp1	NM_031202	2622116	intergenic
4.90871	5	chr4:90871692-90871734	Elavl2	NM_010486	7640	5'	Elavl2	BC049125	19741	Intronic
5.10047	5	chr5:100469092-100469267	AK081324	AK081324	28153	3'	AI461788	AK030894	213163	intergenic
5.10404	5	chr5:104037290-104037307	AK006033	AK006033	141272	intergenic	Aff1	AK030884	56154	5'
5.10419	5	chr5:104190873-104191062	Klhl8	NM_178741	39436	5'	Hsd17b13	NM_198030	4777	3'
5.10663	5	chr5:106633163-106633178	Zfp326	NM_018759	477056	intergenic	E130309B19Rik	NM_001005477	59655	3'
5.10768	5	chr5:107678164-107678198	4921521K07Rik	NM_027599	2840	3'	Cdc7	AK163921	10693	Intronic
5.11103	5	chr5:111029301-111029471	Ulk1	BC059835	27	Intronic	Ulk1	BC059835	256	Intronic
5.11194	5	chr5:111941913-111941919	C130026L21Rik	NM_177875	113668	intergenic	E130006D01Rik	NM_207252	32669	3'
5.11738	5	chr5:117381203-117381262	2400003N08Rik	NM_178622	4269	5'	AK039665	AK039665	120762	intergenic
5.12332	5	chr5:123318676-123318742	AK077141	AK077141	11076	5'	2010310D06Rik	AK132283	18213	5'
5.12434	5	chr5:124342719-124342719	Abcb9	NM_019875	0	intragenic	Abcb9	NM_019875	0	intragenic
5.12599	5	chr5:125986496-125986780	Aacs	NM_030210	179774	intergenic	AK157823	AK157823	1544390	intergenic
5.12606	5	chr5:126062351-126062456	Aacs	NM_030210	255539	intergenic	AK157823	AK157823	1468625	intergenic
5.1277	5	chr5:127702833-127702899	AK157823	AK157823	53223	Intronic	AK157823	AK157823	49239	Intronic
5.12905	5	chr5:129048717-129048844	Fzd10	NM_175284	129979	intergenic	Piwil1	NM_021311	2172	5'
5.1302	5	chr5:130201271-130201304	4930579G22Rik	BC100444	5306	3'	Vkorc1l1	NM_027121	25527	5'
5.13531	5	chr5:135308323-135308492	Stx1a	NM_016801	170	1st intron	Stx1a	NM_016801	13344	1st intron
5.13543	5	chr5:135434527-135434612	Tbl2	NM_013763	78	1st intron	Tbl2	NM_013763	2991	1st intron
5.13976	5	chr5:139764069-139764225	Zfand2a	NM_133349	26088	5'	Uncx4.1	BC051973	33429	5'
5.14027	5	chr5:140276325-140276480	Mad1l1	AF083813	14654	Intronic	Mad1l1	AF083813	41884	Intronic
5.14267	5	chr5:142672809-142672918	Foxk1	NM_199068	18348	1st intron	Foxk1	NM_199068	14750	1st intron
5.14295	5	chr5:142947495-142947660	Wipi2	NM_178398	25735	3'	Zfp469	NM_178242	72206	3'
5.14358	5	chr5:143584108-143584355	Zdhhc4	NM_028379	2259	Intronic	Zdhhc4	NM_028379	1138	Intronic
5.14501	5	chr5:145014956-145015067	BC067004	BC067004	0	1st exon	BC067004	BC067004	0	1st exon
5.14534	5	chr5:145339502-145339652	Arpc1a	NM_019767	2078	1st intron	Arpc1a	NM_019767	5101	1st intron
5.14657	5	chr5:146565386-146565468	Cdk8	NM_153599	1613	Intronic	Cdk8	NM_153599	7020	Intronic
5.15006	5	chr5:150058586-150058600	Hsp110	NM_013559	153996	intergenic	Lgr8	NM_080468	228459	intergenic
5.24036	5	chr5:24035884-24035898	Gbx1	NM_015739	20687	1st intron	Gbx1	NM_015739	283	1st intron
5.24105	5	chr5:24106044-24106203	Smarcd3	NM_025891	0	intragenic	Smarcd3	NM_025891	0	intragenic
5.27397	5	chr5:27398248-27398282	B930011P16Rik	NM_207282	15348	3'	Dpp6	BC048383	194604	intergenic
5.27549	5	chr5:27551090-27551217	B930011P16Rik	NM_207282	168236	intergenic	Dpp6	BC048383	41716	5'
5.27697	5	chr5:27696987-27696988	Dpp6	BC048383	103839	1st intron	Dpp6	NM_010075	16553	1st intron
5.31015	5	chr5:31014986-31015105	Dpysl5	NM_023047	26295	1st intron	Dpysl5	NM_023047	6756	1st intron
5.31138	5	chr5:31140975-31141168	Mapre3	NM_133350	1085	Intronic	Mapre3	NM_133350	82	Intronic
5.36089	5	chr5:36091395-36091529	Ablim2	AJ748603	16541	1st intron	Ablim2	AJ748603	23850	1st intron
5.36661	5	chr5:36662245-36663141	Sorcs2	AK053853	116386	1st intron	Sorcs2	AK053853	51966	1st intron
5.38635	5	chr5:38634857-38634953	Drd5	NM_013503	24346	3'	Slc2a9	AK156740	2615	3'
5.3904	5	chr5:39040827-39040849	Clnk	NM_013748	743	Intronic	Clnk	NM_013748	176	Intronic
5.42406	5	chr5:42408567-42408781	Bapx1	NM_007524	356206	intergenic	Cpeb2	NM_175937	1113531	intergenic
5.48616	5	chr5:48616972-48617215	Slit2	NM_178804	23335	3'	4933428G09Rik	NM_025755	43545	5'
5.54016	5	chr5:54016339-54016476	Cckar	NM_009827	20057	5'	Tbc1d19	NM_144517	81518	5'
5.64437	5	chr5:64438485-64438555	Pgm1	NM_025700	31229	3'	Tbc1d1	AK122445	64	5'
5.64661	5	chr5:64661654-64661726	Tbc1d1	AK122445	31075	3'	Klf3	NM_008453	420966	intergenic
5.71407	5	chr5:71407326-71407435	Gabra2	NM_008066	32396	5'	4930503B16Rik	NM_030052	314577	intergenic
5.73756	5	chr5:73757590-73758089	C130090K23Rik	NM_181323	25279	3'	Dcun1d4	AK076991	2349	5'
5.78343	5	chr5:78343348-78343383	Rest	NM_011263	0	1st exon	Rest	NM_011263	0	1st exon
5.78384	5	chr5:78384900-78385006	2610024G14Rik	NM_019836	120	5'	Polr2b	BC038472	321	5'
5.84284	5	chr5:8428851-8428932	B230315F11Rik	NM_178766	0	1st exon	B230315F11Rik	NM_178766	0	1st exon
5.92782	5	chr5:92782422-92782496	9130213B05Rik	NM_145562	83265	3'	Rchy1	NM_026557	241644	intergenic
5.92828	5	chr5:92828373-92828493	9130213B05Rik	NM_145562	129239	intergenic	Rchy1	NM_026557	195670	intergenic
5.9351	5	chr5:93510361-93510387	Nup54	NM_183392	51	5'	Scarb2	NM_007644	8697	3'
5.93727	5	chr5:93729131-93729347	4932413O14Rik	AK160895	0	intragenic	4932413O14Rik	AK160895	0	intragenic
5.93886	5	chr5:93886502-93886502	Shrm	NM_015756	30391	Intronic	Shrm	AK147493	86761	5'
6.10029	5	chr6:100292907-100292919	Rybp	AF101779	40040	5'	Shq1	NM_181590	246266	intergenic
6.1032	5	chr6:103196293-103196333	Cntn3	NM_008779	650298	intergenic	Chl1	AK040765	280334	intergenic
6.10361	5	chr6:103614902-103614951	Chl1	NM_007697	1824	Intronic	Chl1	NM_007697	335	Intronic
6.1156	5	chr6:115596908-115597050	Raf1	NM_029780	0	intragenic	Raf1	NM_029780	0	intragenic
6.12028	5	chr6:120283825-120284000	Ninj2	NM_016718	117955	intergenic	2700091N06Rik	NM_026028	6403	3'
6.14057	5	chr6:140574857-140575222	BC006653	BC006653	158581	intergenic	Aebp2	NM_178803	10028	5'
6.14292	5	chr6:142920091-142920180	St8sia1	NM_011374	48745	1st intron	St8sia1	NM_011374	621	1st intron
6.17621	5	chr6:17621577-17621648	Capza2	NM_007604	5080	3'	St7	BC024652	22383	5'
6.31647	5	chr6:31647859-31647903	Podxl	NM_013723	153807	intergenic	1700012A03Rik	NM_029587	332568	intergenic
6.31813	5	chr6:31815502-31815655	Podxl	NM_013723	321504	intergenic	1700012A03Rik	NM_029587	164871	intergenic
6.34122	5	chr6:34122447-34122475	Slc35b4	NM_021435	15249	5'	Akr1b3	NM_009658	111631	intergenic
6.34926	5	chr6:34925838-34925997	Gm468	NM_001025573	17766	5'	Cnot4	BC058778	26305	3'
6.34953	5	chr6:34954219-34954262	Cnot4	BC058778	656	Intronic	Cnot4	BC058778	38	Intronic
6.38283	5	chr6:38284987-38285071	Zc3hav1	NM_028864	818	5'	9430097H08Rik	NM_153600	26101	5'
6.45371	5	chr6:45373360-45373464	Cntnap2	NM_001004357	383419	1st intron	Cntnap2	NM_001004357	210183	1st intron
6.50252	5	chr6:50252623-50252726	Osbpl3	BC086485	0	intragenic	Osbpl3	BC086485	0	intragenic
6.59962	5	chr6:59962823-59962938	LOC434019	NM_001034889	1201	1st intron	LOC434019	NM_001034889	49138	1st intron
6.6025	5	chr6:60251181-60251350	LOC434019	NM_001034889	171642	intergenic	A530053G22Rik	NM_177329	74660	3'
6.6111	5	chr6:61110090-61110214	BC107398	BC107398	0	1st exon	BC107398	BC107398	0	1st exon
6.62399	5	chr6:62398953-62398987	BC107398	BC107398	1156784	intergenic	Atoh1	NM_007500	2259763	intergenic
6.67503	5	chr6:67505260-67505535	Tacstd2	NM_020047	40023	5'	BC080787	BC080787	3031610	intergenic
6.69255	5	chr6:69254877-69255048	Tacstd2	NM_020047	1789588	intergenic	BC080787	BC080787	1282045	intergenic
6.82736	5	chr6:82738312-82738394	Hk2	NM_013820	12429	1st intron	Hk2	NM_013820	1221	1st intron
6.82852	5	chr6:82852731-82852769	Hk2	NM_013820	112633	intergenic	Sema4f	BC094567	24791	3'
6.83052	5	chr6:83054787-83054814	Lbx2	NM_010692	901	3'	AK038734	AK038734	12514	5'
6.83069	5	chr6:83069256-83069300	AK038734	AK038734	0	1st exon	AK038734	AK038734	0	1st exon
6.83419	5	chr6:83419532-83419553	AK046543	AK046543	12206	5'	Dguok	BC012647	26333	3'
6.8359	5	chr6:83590847-83590916	Stambp	NM_024239	52787	5'	Clec4f	NM_016751	19317	3'
6.88411	5	chr6:88412118-88412179	Eefsec	AK087501	0	1st exon	Eefsec	NM_023060	0	1st exon
7.10924	5	chr7:109237906-109238077	Lmo1	NM_057173	276301	intergenic	Trim66	NM_181853	2187	3'
7.113	5	chr7:112999390-112999521	Arntl	BC011080	630	1st intron	Arntl	BC011080	26348	1st intron
7.11837	5	chr7:118375197-118375260	Tmc7	NM_172476	17654	1st intron	Tmc7	NM_172476	523	1st intron
7.11881	5	chr7:118807467-118807592	Gprc5b	NM_022420	21225	5'	Gp2	AK009843	426160	intergenic
7.1189	5	chr7:118902871-118903089	Gprc5b	NM_022420	116676	intergenic	Gp2	AK009843	330709	intergenic
7.1191	5	chr7:11910119-11910194	Zfp499	NM_001024699	177	5'	Trim28	NM_011588	14182	5'
7.12138	5	chr7:121387200-121387640	Otoa	NM_139310	433183	intergenic	AK122466	AK122466	45748	3'
7.123	5	chr7:123005509-123005617	AK147327	AK147327	20437	3'	Slc5a11	AF518726	441	5'
7.12767	5	chr7:127667968-127668057	Zfp668	NM_146259	41	5'	6820429M01	NM_172749	835	5'
7.13175	5	chr7:131755979-131756191	Bub3	NM_009774	393039	intergenic	Gpr26	NM_173410	48716	5'
7.1319	5	chr7:131898593-131898596	Cpxm2	NM_018867	321	Intronic	Cpxm2	NM_018867	1814	Intronic
7.13359	5	chr7:133590181-133590267	Dhx32	BC022920	2845	1st intron	Dhx32	BC022920	7517	1st intron
7.13529	5	chr7:135292137-135292245	Foxi2	BC096623	40232	3'	Tmem12	NM_178669	58877	3'
7.139	5	chr7:139000536-139000544	Stk32c	NM_021302	8090	1st intron	Stk32c	NM_021302	38877	1st intron
7.14064	5	chr7:140643509-140643728	AK016694	AK016694	4445	5'	BC066028	AK141045	15149	3'
7.14069	5	chr7:140694891-140694940	BC051545	BC051545	5630	3'	Odf3	NM_027019	4234	5'
7.14176	5	chr7:141768878-141768984	Brsk2	NM_001009930	9362	1st intron	Brsk2	NM_001009930	21994	1st intron
7.14397	5	chr7:143969479-143969651	Dhcr7	NM_007856	311766	intergenic	Cttn	NM_007803	275547	intergenic
7.15032	5	chr7:15033580-15033700	Crx	NM_007770	3842	1st intron	Crx	NM_007770	4696	1st intron
7.18969	5	chr7:18969876-18970075	Bcl3	NM_033601	45	Intronic	Bcl3	NM_033601	40	Intronic
7.27117	5	chr7:27117521-27117681	Spnb4	AY032655	0	intragenic	Spnb4	AB055618	0	intragenic
7.27359	5	chr7:27359453-27359620	Akt2	NM_007434	11326	3'	BC089566	BC089566	3146	5'
7.27837	5	chr7:27838111-27838437	9530053A07Rik	NM_176924	32	1st intron	9530053A07Rik	NM_176924	306	1st intron
7.27922	5	chr7:27923256-27923545	Dyrk1b	NM_001037957	27347	3'	Cri2	NM_198425	53239	5'
7.28671	5	chr7:28671049-28671217	Actn4	NM_021895	93	5'	Eif3s12	NM_028659	8998	3'
7.2869	5	chr7:28690828-28690925	Map4k1	AK143215	0	1st exon	Map4k1	AK143215	0	1st exon
7.29913	5	chr7:29913859-29913953	Capns1	BC090988	10098	5'	Ckap1	NM_025548	18992	3'
7.30148	5	chr7:30148775-30148990	Aplp1	NM_007467	59	Intronic	Aplp1	NM_007467	20	Intronic
7.33544	5	chr7:33545558-33545664	Abpz	NM_177446	97556	5'	Abpg	NM_178308	106157	intergenic
7.34677	5	chr7:34677861-34677910	Pep4	NM_008820	14523	Intronic	Pep4	NM_008820	378	Intronic
7.35026	5	chr7:35026968-35027141	Gpatc1	NM_026181	7720	1st intron	Gpatc1	NM_026181	45	1st intron
7.37477	5	chr7:37478929-37478942	Zfp536	NM_172385	423	5'	C80913	NM_011274	189825	intergenic
7.40533	5	chr7:40535736-40535965	3000002G13Rik	NM_001004139	1221232	intergenic	2900093B09Rik	NM_021387	136579	intergenic
7.43207	5	chr7:43207989-43208014	Zfp715	AK011730	26835	5'	Siglecf	NM_145581	11322	5'
7.43451	5	chr7:4348985-4349221	Suv420h2	NM_146177	78	Intronic	Suv420h2	NM_146177	59	Intronic
7.45103	5	chr7:45103237-45103286	Cd37	AK155663	0	intragenic	Cd37	AK155663	0	intragenic
7.48827	5	chr7:48826828-48826934	AK158324	AK158324	77140	5'	5330421F07Rik	AK039374	287327	intergenic
7.49777	5	chr7:49778702-49778766	Slc6a5	AY147186	332	1st intron	Slc6a5	NM_148931	54	5'
7.49964	5	chr7:49966170-49966217	B230343H07Rik	NM_001037906	35404	Intronic	B230343H07Rik	NM_001037906	22356	Intronic
7.5077	5	chr7:50771703-50771720	B230343H07Rik	NM_001037906	40404	3'	Tmem16e	NM_177694	607335	intergenic
7.6458	5	chr7:64583164-64583413	Apba2	NM_007461	8321	Intronic	Apba2	NM_007461	10091	Intronic
7.80243	5	chr7:80244423-80244504	Man2a2	NM_172903	21	1st intron	Man2a2	NM_172903	150	1st intron
7.86192	5	chr7:86192798-86192948	F830104D24Rik	NM_001033878	1308961	intergenic	Olfr307	NM_146617	18339	3'
7.98716	5	chr7:98718828-98718999	Wnt11	AK077828	4531	Intronic	Wnt11	AK077828	2651	Intronic
8.10943	5	chr8:109430585-109430714	Cdh3	NM_001037809	28	Intronic	Cdh3	NM_001037809	2129	Intronic
8.11037	5	chr8:110369405-110369591	Wwp2	BC048184	22368	Intronic	Wwp2	BC048184	2961	Intronic
8.11717	5	chr8:117167280-117167385	AI427515	NM_173016	9922	Intronic	AI427515	NM_173016	887	Intronic
8.12052	5	chr8:120518369-120518391	Plcg2	NM_172285	11140	Intronic	Plcg2	NM_172285	1869	Intronic
8.12299	5	chr8:122986399-122986528	Zdhhc7	NM_133967	7485	1st intron	Zdhhc7	NM_133967	604	1st intron
8.12338	5	chr8:123382847-123382883	Gse1	NM_198671	7737	1st intron	AK006008	AK006008	40002	3'
8.12561	5	chr8:12561952-12562052	AK085316	AK085316	7507	1st intron	1700094C09Rik	NM_024279	11022	5'
8.12599	5	chr8:125991464-125991569	Rpl13	NM_016738	186	3'	Cpne7	AK049823	12019	5'
8.1279	5	chr8:127899072-127899100	Tsnax	NM_016909	0	1st exon	Tsnax	NM_016909	0	1st exon
8.12927	5	chr8:129268533-129268555	Slc35f3	NM_175434	120	Intronic	Slc35f3	NM_175434	4373	Intronic
8.13015	5	chr8:130151069-130151189	Pard3	NM_033620	103728	Intronic	Pard3	NM_033620	11980	Intronic
8.1433	5	chr8:14333975-14334252	Dlgap2	NM_172910	76110	Intronic	Dlgap2	AK082945	47858	5'
8.17943	5	chr8:17944834-17945111	Csmd1	NM_053171	409714	intergenic	Mcph1	NM_173189	650176	intergenic
8.24527	5	chr8:24528998-24529134	Ank1	AK147597	4851	1st intron	Ank1	AK147597	1429	1st intron
8.27062	5	chr8:27062729-27062876	D030041N04Rik	NM_173012	0	1st exon	D030041N04Rik	BC055685	0	1st exon
8.2864	5	chr8:28640454-28640697	AK030769	AK030769	0	1st exon	AK030769	AK030769	0	1st exon
8.38052	5	chr8:38053043-38053104	AK147539	AK147539	0	intragenic	AK147539	AK147539	0	intragenic
8.40215	5	chr8:40215786-40216161	Sgcz	AK136779	85948	5'	Tusc3	BC069898	258409	intergenic
8.41806	5	chr8:41806193-41806411	Fgf20	AK052233	20532	5'	Zdhhc2	NM_178395	116328	intergenic
8.4688	5	chr8:46880012-46880034	BC035537	NM_153535	0	1st exon	BC035537	NM_153535	0	1st exon
8.58646	5	chr8:58646297-58646329	Gpm6a	NM_153581	2086746	intergenic	Adam29	NM_175939	116739	intergenic
8.67945	5	chr8:67947327-67947508	Trim61	NM_153110	1023	1st intron	Trim60	NM_153097	28	1st intron
8.68152	5	chr8:68152446-68152481	AK136454	AK136454	94062	5'	March1	AK086052	394605	intergenic
8.69287	5	chr8:69287805-69287806	March1	NM_175188	82104	Intronic	March1	AK163081	27483	5'
8.71195	5	chr8:71195537-71195679	4931420C21Rik	AK028684	204333	intergenic	AK008803	AK008803	10122	5'
8.7267	5	chr8:72670456-72670493	1200003I07Rik	NM_181274	25002	5'	AK133399	AK133399	19839	3'
8.73044	5	chr8:73049795-73049910	Cspg3	NM_007789	53	5'	Rfxank	NM_011266	9941	3'
8.73728	5	chr8:73731453-73731600	AK140821	AK140821	10100	5'	Il12rb1	NM_008353	5955	5'
8.73791	5	chr8:73792523-73792578	A230052G05Rik	NM_001002766	0	1st exon	A230052G05Rik	NM_001002766	0	1st exon
8.74256	5	chr8:74258741-74259100	Myo9b	NM_015742	1251	Intronic	Myo9b	NM_015742	775	Intronic
8.81111	5	chr8:81113459-81113553	1700031F13Rik	AK006580	3363	Intronic	1700031F13Rik	AK006580	469	Intronic
8.81634	5	chr8:81634896-81635117	2410193C02Rik	AK079901	4931	3'	BC098230	BC098230	67633	3'
8.86917	5	chr8:86917620-86917704	1700067K01Rik	NM_183097	22787	3'	Il27ra	NM_016671	2768	3'
8.87228	5	chr8:87230998-87231089	4930527D15Rik	NM_026350	70578	5'	Cacna1a	AK052625	47501	5'
8.8782	5	chr8:87820812-87820903	Mast1	AK141034	1370	Intronic	Mast1	AK141034	66	Intronic
8.89976	5	chr8:89977708-89977750	AK147522	AK147522	202366	intergenic	AK139810	AK139810	107462	intergenic
8.90239	5	chr8:90240469-90240721	AK139810	AK139810	150640	intergenic	Cbln1	NM_019626	118376	intergenic
8.90359	5	chr8:90360885-90361001	Cbln1	NM_019626	387	Intronic	Cbln1	NM_019626	852	Intronic
8.91121	5	chr8:91123673-91123849	BC059053	BC059053	33154	Intronic	BC059053	BC059053	9583	Intronic
8.96342	5	chr8:9635334-9635365	Tmem28	AK149049	311666	intergenic	Tmem28	NM_173446	134698	1st intron
8.96637	5	chr8:96637703-96637763	AK007235	AK007235	256448	intergenic	Gnao1	NM_010308	62285	5'
8.97342	5	chr8:97342381-97342393	A630085K21	NM_177903	19092	5'	Cpne2	NM_153507	79768	5'
8.97684	5	chr8:97689984-97690047	Cx3cl1	NM_009142	18462	3'	Ccl17	NM_011332	9581	5'
9.10045	5	chr9:100452374-100452492	Nck1	NM_010878	97028	5'	Stag1	NM_009282	540	5'
9.10513	5	chr9:105130550-105130699	Nek11	NM_172461	28100	Intronic	Nek11	NM_172461	15106	Intronic
9.10724	5	chr9:107239741-107239945	6430571L13Rik	NM_175486	32059	3'	Cacna2d2	NM_020263	17868	5'
9.10797	5	chr9:107972933-107973099	Bsn	NM_007567	0	intragenic	Bsn	NM_007567	0	intragenic
9.10843	5	chr9:108426189-108426209	4733401H18Rik	NM_023247	754	5'	Dalrd3	NM_026378	1795	5'
9.10865	5	chr9:108653313-108653416	Ihpk2	NM_029634	0	1st exon	Ihpk2	AK005166	0	intragenic
9.10881	5	chr9:108812726-108812895	Col7a1	NM_007738	83	Intronic	Col7a1	NM_007738	17	Intronic
9.10997	5	chr9:109967363-109967442	AK133660	AK133660	1891	3'	Smarcc1	AK144122	9822	5'
9.11772	5	chr9:117721087-117721520	Rbms3	AK046197	242692	intergenic	Azi2	AK036102	168009	intergenic
9.12196	5	chr9:121965726-121965881	C85492	NM_153540	121129	intergenic	Snrk	NM_133741	14795	5'
9.21182	5	chr9:21182340-21182428	Dnm2	AK005012	6726	1st intron	Dnm2	AK005012	25519	1st intron
9.21679	5	chr9:21679847-21680083	2510048L02Rik	AK016073	29	Intronic	2510048L02Rik	AK016073	1745	Intronic
9.24496	5	chr9:24497046-24497149	Tbx20	NM_020496	5987	Intronic	Tbx20	AK052155	1460	3'
9.34691	5	chr9:34691932-34692100	Kirrel3	BC063072	3084	Intronic	Kirrel3	BC063072	2023	Intronic
9.35308	5	chr9:35308185-35308253	Ddx25	NM_013932	84	5'	Pus3	NM_023292	916	5'
9.37135	5	chr9:37135516-37135533	2900042E01Rik	NM_175189	0	intragenic	2900042E01Rik	NM_175189	0	intragenic
9.41923	5	chr9:41923211-41923488	Sorl1	AK147303	48065	5'	Sc5d	NM_172769	81821	3'
9.42222	5	chr9:42223003-42223111	Lrrc35	AK052261	10660	5'	Lrrc35	NM_173038	2	1st intron
9.43684	5	chr9:43685824-43685833	Pvrl1	NM_021424	127379	intergenic	AK138823	AK138823	44129	3'
9.451	5	chr9:45100699-45100849	Tmprss13	NM_001013373	2201	3'	Fxyd6	BC051127	20630	5'
9.45459	5	chr9:45461249-45461535	AK014832	AK014832	157108	intergenic	BC066145	BC066145	56552	3'
9.46341	5	chr9:46342376-46342452	4931429L15Rik	NM_183104	271433	intergenic	Igsf4a	AK013911	938836	intergenic
9.47841	5	chr9:47841686-47841871	Igsf4a	NM_207675	237400	intergenic	D930028F11Rik	AK048132	72188	5'
9.50182	5	chr9:50183291-50183429	Ncam1	NM_010875	632240	intergenic	1600029D21Rik	AK002767	63395	5'
9.52437	5	chr9:52439145-52439200	AI593442	NM_177907	0	1st exon	AI593442	NM_177907	0	1st exon
9.56603	5	chr9:56604926-56604983	Lrrn6a	NM_181074	121564	intergenic	Odf3l1	NM_198673	41841	3'
9.57738	5	chr9:57739251-57739336	Sema7a	NM_011352	828	1st intron	Sema7a	NM_011352	12378	1st intron
9.82882	5	chr9:82881954-82882011	AK136530	AK136530	109838	intergenic	Hmgn3	NM_026122	24682	3'
9.85067	5	chr9:85067134-85067195	Bckdhb	NM_199195	1146207	intergenic	AK086768	AK086768	50474	3'
9.95369	5	chr9:95369691-95369844	Paqr9	NM_198414	0	1st exon	Paqr9	NM_198414	0	1st exon
9.99034	5	chr9:99036216-99036251	Pik3cb	NM_029094	86794	5'	Cep70	AK133048	16580	5'
9.9917	5	chr9:99172568-99172621	Cep70	BC050819	62841	3'	Mras	BC024389	24736	3'
10.1145	5	chr10:114455431-114455457	Trhde	AK085724	249964	intergenic	Tph2	NM_173391	27307	3'
10.115	5	chr10:114991596-114991601	Lgr5	AK047873	0	1st exon	Lgr5	NM_010195	0	1st exon
10.1178	5	chr10:117781337-117781367	Iltifb	BC104348	83343	5'	Ifng	NM_008337	62686	5'
10.1208	5	chr10:120768226-120768281	Gns	NM_029364	0	1st exon	Gns	NM_029364	0	1st exon
10.1209	5	chr10:120879591-120879621	Rassf3	NM_138956	296	5'	Tbk1	AK168193	69912	3'
10.1261	5	chr10:126083987-126084287	Lrig3	NM_177152	665954	intergenic	Xrcc6bp1	NM_026858	187240	intergenic
10.1265	5	chr10:126505311-126505554	4632413K17Rik	AK014574	1315	3'	4632413K17Rik	NM_177614	16614	Intronic
10.1268	5	chr10:12681257-12681317	AK017897	AK017897	27009	5'	Sf3b5	NM_175102	17363	5'
10.1269	5	chr10:126939982-126940085	Shmt2	NM_028230	14651	5'	Lrp1	NM_008512	1108	3'
10.1279	5	chr10:127937770-127937891	Mbc2	AK044656	9013	5'	Zc3h10	NM_134003	8680	3'
10.1296	5	chr10:129578029-129578210	Olfr825	NM_146677	11846	5'	Neurod4	NM_007501	92981	3'
10.1324	5	chr10:13243344-13243441	Pex3	NM_019961	100	5'	Deadc1	NM_025748	41	5'
10.2577	5	chr10:25771512-25771813	C030003D03Rik	AK021041	2799	3'	Gm623	NM_001013766	147459	intergenic
10.3557	5	chr10:3557769-3557902	Oprm1	AF260307	0	intragenic	Oprm1	AB047546	0	1st exon
10.4058	5	chr10:40578608-40578856	Wasf1	NM_031877	6708	1st intron	Wasf1	NM_031877	29929	1st intron
10.4216	5	chr10:42155600-42155627	Lace1	NM_145743	12668	1st intron	Lace1	NM_145743	11063	1st intron
10.4226	5	chr10:42263108-42263141	Nr2e1	NM_152229	266	Intronic	Nr2e1	NM_152229	3455	Intronic
10.4277	5	chr10:42768854-42768951	5330439J01Rik	BC058972	57579	5'	9030612E09Rik	NM_172419	94215	5'
10.4517	5	chr10:45171813-45171852	2810403D23Rik	NM_001033152	7021	1st intron	2810403D23Rik	NM_001033152	2009	1st intron
10.4947	5	chr10:49473902-49473919	Grik2	BC060154	2028	5'	BC059917	BC059917	928779	intergenic
10.5915	5	chr10:59149263-59149328	Cbara1	NM_144822	3391	Intronic	Cbara1	BC023022	2766	Intronic
10.6142	5	chr10:61423811-61423989	Col13a1	NM_007731	49435	5'	2010107G23Rik	NM_027251	79111	3'
10.64	5	chr10:64003872-64004048	Ctnna3	NM_177612	22443	Intronic	Ctnna3	NM_177612	67160	Intronic
10.6964	5	chr10:69640355-69640564	Ank3	NM_009670	220036	intergenic	Slc16a9	NM_025807	172	5'
10.6972	5	chr10:69720650-69720779	Slc16a9	NM_025807	39406	3'	1200015N20Rik	AK036299	115347	intergenic
10.7099	5	chr10:70993351-70993353	Ipmk	NM_027184	212169	intergenic	1700049L16Rik	NM_175390	381828	intergenic
10.7352	5	chr10:7352870-7352898	Pcmt1	NM_008786	13539	1st intron	Pcmt1	NM_008786	379	1st intron
10.7415	5	chr10:7416106-7416146	Nup43	NM_145706	47059	3'	Katna1	NM_011835	84	5'
10.7727	5	chr10:77270907-77270970	C330046G03Rik	AK082868	14	Intronic	C330046G03Rik	AK082868	1719	Intronic
10.7932	5	chr10:79323260-79323424	Gpr54	NM_053244	662	Intronic	Gpr54	NM_053244	480	Intronic
10.7938	5	chr10:79380516-79380581	ORF61	NM_001003949	0	intragenic	ORF61	NM_001003949	0	intragenic
10.7959	5	chr10:79594092-79594319	Efna2	NM_007909	1431	3'	Mum1	NM_023431	37248	5'
10.7971	5	chr10:79719082-79719250	Apc2	NM_011789	12	3'	2310011J03Rik	NM_025521	2216	3'
10.8026	5	chr10:80268788-80268799	3110056O03Rik	AK046804	0	intragenic	3110056O03Rik	AK046804	0	intragenic
10.8545	5	chr10:85452088-85452167	Fbxo7	AK150190	0	1st exon	Fbxo7	AK150190	0	1st exon
10.8656	5	chr10:86558633-86558809	Stab2	AK164675	120900	intergenic	AK007195	AK007195	77055	5'
10.8702	5	chr10:87016622-87016758	Pah	NM_008777	2760	3'	BC028536	BC028536	239496	intergenic
10.8981	5	chr10:89806547-89806657	E030041M21Rik	NM_029166	558403	intergenic	Apaf1	AK220340	612513	intergenic
10.9363	5	chr10:93628752-93628813	Nr2c1	BC094580	3299	3'	Ndufa12	NM_025551	24	5'
10.9558	5	chr10:95582930-95583068	Eea1	NM_001001932	108181	intergenic	Btg1	NM_007569	463714	intergenic
11.1	5	chr11:100019790-100019800	Krt1-14	BC011074	296	Intronic	Krt1-14	BC011074	249	Intronic
11.1002	5	chr11:100161628-100161711	Gast	NM_010257	8583	3'	Hap1	NM_177981	1746	3'
11.1002	5	chr11:100238769-100238769	Nt5c3l	NM_026561	0	intragenic	Fkbp10	NM_010221	0	intragenic
11.1006	5	chr11:100613270-100613635	Stat5b	NM_011489	119	Intronic	Stat5b	NM_011489	282	Intronic
11.1008	5	chr11:100826625-100826870	Atp6v0a1	NM_016920	1093	1st intron	Atp6v0a1	NM_016920	1098	1st intron
11.1011	5	chr11:101069680-101069865	Ramp2	NM_019444	5434	3'	Vps25	NM_026776	59	5'
11.1024	5	chr11:102440127-102440362	Fzd2	NM_020510	17582	3'	Ccdc43	NM_025918	60532	3'
11.1025	5	chr11:102513899-102513921	Ccdc43	BC058520	86	5'	Adam11	BC054536	63757	5'
11.1031	5	chr11:103059892-103060024	Map3k14	NM_016896	1479	1st intron	AK006468	AK006468	20990	3'
11.1037	5	chr11:103702315-103702459	Nsf	NM_008740	3356	Intronic	Nsf	NM_008740	24144	Intronic
11.1038	5	chr11:103834997-103835080	Arf2	NM_007477	33614	3'	Crhr1	NM_007762	113932	intergenic
11.105	5	chr11:104981891-104981906	Mettl2	NM_172567	25414	3'	Tlk2	AF045252	12997	5'
11.1064	5	chr11:106416397-106416662	Tex2	AK129434	31812	1st intron	Tex2	AK129434	12417	1st intron
11.1092	5	chr11:109200178-109200271	Gna13	AK011851	3660	3'	Gna13	AK149766	8210	Intronic
11.1092	5	chr11:109242118-109242147	X83328	AK143908	12	1st intron	X83328	BC025087	182	5'
11.1152	5	chr11:115190735-115190857	C630004H02Rik	AK138882	6980	5'	Ict1	BC028523	29044	5'
11.1165	5	chr11:116463667-116463682	Cygb	NM_030206	592	Intronic	Cygb	NM_030206	1697	Intronic
11.1166	5	chr11:116566119-116566279	St6galnac2	AK136381	55446	5'	AK158468	AK158468	2208	5'
11.1172	5	chr11:117244083-117244098	Sept9	AK122415	65690	3'	LOC432615	NM_001004166	56366	5'
11.1174	5	chr11:117444039-117444170	LOC432615	NM_001004166	139000	intergenic	AK147471	AK147471	26718	5'
11.1203	5	chr11:120253778-120253836	Nploc4	AK149823	46	5'	Tspan10	AK148155	4952	5'
11.3091	5	chr11:3093017-3093090	BC046305	BC046305	3994	1st intron	BC046305	BC046305	308	1st intron
11.4294	5	chr11:42945028-42945229	AK086464	AK086464	64427	3'	AK033531	AK033531	48170	5'
11.4431	5	chr11:44313920-44313984	Ublcp1	BC085111	3516	5'	3732413I11Rik	NM_028862	48433	5'
11.4735	5	chr11:47346905-47347053	Sgcd	NM_011891	124254	intergenic	Sgcd	AK047384	75247	Intronic
11.4854	5	chr11:48539947-48540065	Sgcd	AK047384	707614	intergenic	Gnb2l1	NM_008143	103775	intergenic
11.4948	5	chr11:49477223-49477246	Flt4	NM_008029	560	Intronic	Flt4	NM_008029	173	Intronic
11.4964	5	chr11:49639785-49639975	Gfpt2	BC031928	2214	1st intron	Gfpt2	BC031928	8493	1st intron
11.5037	5	chr11:50365125-50365314	Rufy1	AK046633	90685	5'	Adamts2	NM_175643	80298	5'
11.5211	5	chr11:52109661-52109715	Tcf7	NM_009331	4641	Intronic	Tcf7	NM_009331	15855	Intronic
11.5212	5	chr11:52125150-52125193	Tcf7	NM_009331	20124	Intronic	Tcf7	NM_009331	372	Intronic
11.539	5	chr11:53902377-53902479	Pdlim4	NM_019417	2681	Intronic	Pdlim4	NM_019417	931	Intronic
11.5739	5	chr11:57393434-57393678	Mfap3	NM_145426	43545	3'	Galnt10	NM_134189	68079	5'
11.5878	5	chr11:58776354-58776472	Hist3h2a	NM_178218	3544	3'	Trim17	NM_031172	3561	5'
11.5965	5	chr11:59655626-59655718	Cops3	AK048906	2457	1st intron	Cops3	AK048906	191	1st intron
11.6135	5	chr11:61354499-61354637	Epn2	AK173093	2990	Intronic	Epn2	AK173093	5783	Intronic
11.6192	5	chr11:6192171-6192274	Ogdh	BC057354	526	1st intron	Ogdh	BC049104	384	5'
11.6499	5	chr11:6501905-6501968	BC072589	BC072589	0	intragenic	BC072589	BC072589	0	intragenic
11.7304	5	chr11:73039229-73039285	Carkl	NM_029031	0	intragenic	Carkl	NM_029031	0	intragenic
11.7321	5	chr11:73211705-73211861	Olfr1	NM_146921	0	1st exon	Olfr1	NM_146921	0	1st exon
11.7447	5	chr11:74469651-74469700	BC072573	BC072573	3786	1st intron	BC072573	BC072573	2941	1st intron
11.7949	5	chr11:79491389-79491473	Rab11fip4	NM_175543	54681	Intronic	Rab11fip4	NM_175543	5550	Intronic
11.7996	5	chr11:79958368-79958461	1110002N22Rik	AK146639	66	5'	Centa2	AK053152	11898	5'
11.8012	5	chr11:80117821-80117866	Rhbdl4	NM_139228	377	1st intron	Rhbdl4	NM_139228	1014	1st intron
11.8016	5	chr11:80162173-80162437	Rhbdl4	NM_139228	8523	Intronic	Rhbdl4	NM_139228	714	Intronic
11.8019	5	chr11:80194222-80194308	BC055024	BC055024	71	5'	Zfp207	AK146787	5244	5'
11.8078	5	chr11:80778577-80778726	Accn1	NM_001034013	9849	Intronic	Accn1	NM_001034013	9006	Intronic
11.8233	5	chr11:82331060-82331168	Gm644	NM_023438	68592	3'	AY512914	AY512914	118432	intergenic
11.8717	5	chr11:87175111-87175162	Ppm1e	NM_177167	0	1st exon	Ppm1e	NM_177167	0	1st exon
11.882	5	chr11:88197673-88197820	Msi2h	NM_054043	14704	Intronic	Msi2h	NM_054043	4492	Intronic
11.9381	5	chr11:93813262-93813309	Spag9	AF327451	622	1st intron	Spag9	AF327451	16426	1st intron
11.9414	5	chr11:94144106-94144163	3300001P08Rik	AK151228	6086	5'	Ankrd40	NM_027799	103	5'
11.9482	5	chr11:94827153-94827254	Samd14	NM_146025	537	1st intron	Samd14	NM_146025	3237	1st intron
11.9663	5	chr11:96635684-96635744	Nfe2l1	BC043063	0	intragenic	Nfe2l1	X78709	0	intragenic
11.9687	5	chr11:96876228-96876431	Mrpl10	NM_026154	11026	3'	Tbx21	NM_019507	37833	3'
11.97	5	chr11:97000964-97001303	Kpnb1	BC055115	0	intragenic	Kpnb1	BC055115	0	intragenic
11.9744	5	chr11:97439441-97439511	P140	NM_018873	48260	5'	E130012A19Rik	NM_175332	4001	3'
11.992	5	chr11:99202786-99203028	Krt1-10	NM_010660	69	Intronic	Krt1-10	NM_010660	179	Intronic
12.1006	5	chr12:100622630-100622743	Calm1	NM_009790	11830	3'	AK147460	AK147460	54971	5'
12.1039	5	chr12:103881452-103881490	1810023F06Rik	NM_145449	23198	5'	8430415E04Rik	NM_028980	52142	5'
12.1049	5	chr12:104904976-104905004	AK045313	AK045313	26451	3'	Dicer1	AF430845	187497	intergenic
12.107	5	chr12:107034174-107034303	Vrk1	NM_011705	555778	intergenic	AK014062	AK014062	907706	intergenic
12.1087	5	chr12:108655139-108655318	Ccnk	AK146711	4062	3'	Cyp46a1	NM_010010	126958	intergenic
12.1093	5	chr12:109341923-109342102	Wars	BC046232	92	5'	Wdr25	NM_177602	126595	intergenic
12.1187	5	chr12:118672271-118672316	Dnahc11	NM_010060	29148	5'	Sp4	NM_009239	6740	3'
12.1271	5	chr12:12707623-12707928	D12Ertd553e	NM_029758	305430	intergenic	Mycn	NM_008709	254304	intergenic
12.3101	5	chr12:31016863-31016868	Sntg2	NM_172951	57485	5'	Tmem18	AK133493	153629	intergenic
12.3602	5	chr12:3602667-3602904	Dtnb	AK043436	5923	Intronic	Dtnb	AK043436	14819	Intronic
12.4053	5	chr12:40527382-40527612	Arl4a	BC003725	5614	Intronic	Arl4a	NM_001039515	16216	3'
12.4112	5	chr12:41118200-41118311	Dock4	NM_172803	161438	1st intron	Dock4	NM_172803	13387	1st intron
12.4187	5	chr12:41866636-41866645	Immp2l	NM_053122	245274	Intronic	Lrrn3	NM_010733	95450	3'
12.4529	5	chr12:45295432-45295448	C130076O07Rik	NM_176930	37099	Intronic	C130076O07Rik	NM_176930	31469	Intronic
12.5742	5	chr12:5743753-5743896	2810032G03Rik	NM_028318	301186	intergenic	AK147540	AK147540	2292584	intergenic
12.6429	5	chr12:6429563-6429569	2810032G03Rik	NM_028318	986928	intergenic	AK147540	AK147540	1606842	intergenic
12.6978	5	chr12:69779075-69779158	Mamdc1	AK137667	1637962	intergenic	Ppil5	NM_027178	308308	intergenic
12.7348	5	chr12:73475449-73475489	1810048J11Rik	AK136802	0	intragenic	1810048J11Rik	AK136802	0	intragenic
12.7358	5	chr12:73583227-73583304	Dhrs7	BC016189	4931	1st intron	Dhrs7	BC016189	200	1st intron
12.8212	5	chr12:82125128-82125208	Slc8a3	BC052435	1304	Intronic	Slc8a3	NM_080440	3132	Intronic
12.8521	5	chr12:85206532-85206554	Zadh1	NM_029880	964	3'	Zfp410	NM_144833	325	5'
12.8598	5	chr12:85982331-85982622	1700058C01Rik	NM_175198	3627	Intronic	1700058C01Rik	NM_175198	758	Intronic
12.8769	5	chr12:87692135-87692467	Angel1	NM_144524	76747	5'	6430527G18Rik	NM_145836	77503	3'
12.8922	5	chr12:89222908-89223019	Adck1	BC010539	247766	intergenic	Nrxn3	AK149250	13402	5'
12.9899	5	chr12:98989714-98989856	1700024D23Rik	NM_029911	10795	5'	Spata7	AK153698	39430	5'
12.9903	5	chr12:99029541-99029674	Spata7	AK161308	223	1st intron	Spata7	AK161308	3404	1st intron
13.1006	5	chr13:100614938-100615152	Mtap1b	NM_008634	6679	1st intron	Mtap1b	NM_008634	1414	1st intron
13.1066	5	chr13:106564063-106564251	Htr1a	NM_008308	0	1st exon	Htr1a	NM_008308	0	1st exon
13.201	5	chr13:20099193-20099229	Elmo1	AK220253	975	1st intron	Elmo1	AK220253	93606	1st intron
13.2338	5	chr13:23383200-23383261	Zfp322a	NM_172586	6596	5'	Abt1	NM_013924	42596	3'
13.3372	5	chr13:3372448-3372478	AK006638	AK006638	183539	intergenic	Gdi2	AK079690	164911	intergenic
13.4929	5	chr13:49294554-49294615	Fgd3	NM_015759	692	Intronic	Fgd3	NM_015759	3045	Intronic
13.4982	5	chr13:49822744-49822752	Iars	NM_172015	76554	3'	Gm906	NM_001033438	434928	intergenic
13.5101	5	chr13:51012991-51013205	Gm906	AK133043	297166	intergenic	Spin	NM_146043	100302	intergenic
13.5409	5	chr13:54089474-54089705	Sfxn1	NM_027324	8036	1st intron	Sfxn1	NM_027324	5479	1st intron
13.542	5	chr13:54203425-54203491	Hrh2	NM_001010973	1644	1st intron	Hrh2	NM_001010973	19730	1st intron
13.5502	5	chr13:55021763-55021803	Hk3	NM_001033245	0	intragenic	Hk3	NM_001033245	0	intragenic
13.5546	5	chr13:55461907-55462067	Gprk6	NM_001038018	40	Intronic	Gprk6	NM_001038018	680	Intronic
13.5676	5	chr13:56763105-56763301	Smad5	NM_008541	11205	3'	Trpc7	NM_012035	19525	3'
13.6329	5	chr13:63289986-63290180	AK141931	AK141931	40467	Intronic	AK141931	AK141931	1279	Intronic
13.7002	5	chr13:70024328-70024340	A530095I07Rik	NM_207226	12939	5'	Srd5a1	NM_175283	16486	3'
13.704	5	chr13:70400235-70400334	D13Wsu50e	NM_138596	116818	intergenic	BC026613	BC026613	655782	intergenic
13.7421	5	chr13:74214785-74214874	Slc12a7	AK052910	15490	1st intron	Slc12a7	NM_011390	14868	5'
13.8214	5	chr13:82135635-82135766	Lysmd3	NM_030257	427	1st intron	Lysmd3	NM_030257	6640	1st intron
13.8541	5	chr13:85410510-85410733	2810446P07Rik	NM_175187	641547	intergenic	Ccnh	AK137849	251935	intergenic
13.9936	5	chr13:99363383-99363465	Ankra2	BC079615	0	1st exon	Ankra2	NM_023472	0	1st exon
14.1078	5	chr14:107796734-107796818	Slitrk1	AK173296	0	1st exon	Slitrk1	AK173296	0	1st exon
14.1215	5	chr14:121529779-121529940	Clybl	NM_029556	10357	Intronic	Clybl	NM_029556	7266	Intronic
14.1877	5	chr14:18775386-18775531	Gng2	NM_010315	7513	5'	BC027644	BC027644	92367	3'
14.1914	5	chr14:19136617-19136685	5730461K03Rik	NM_027475	15	5'	LOC218805	NM_172379	61	5'
14.2591	5	chr14:25907603-25907689	Il17rd	NM_134437	4354	Intronic	Il17rd	NM_134437	1891	Intronic
14.2925	5	chr14:29253270-29253271	Cacna1d	AB086123	71252	5'	Dcp1a	NM_133761	55349	5'
14.427	5	chr14:4273014-4273027	2610042L04Rik	BC040090	54038	3'	2610042L04Rik	BC040090	10616	1st intron
14.5321	5	chr14:53212238-53212256	Dad1	NM_010015	370	5'	Abhd4	AK152595	4988	5'
14.5473	5	chr14:54734068-54734126	Adcy4	NM_080435	0	intragenic	Adcy4	NM_080435	0	intragenic
14.625	5	chr14:62498052-62498191	Mtmr9	NM_177594	58	5'	Xkr6	NM_173393	251006	intergenic
14.6295	5	chr14:62949395-62949596	AK132943	AK132943	3348	3'	AJ491325	AJ491325	26503	5'
14.6349	5	chr14:63494744-63494953	Msra	NM_026322	84835	5'	F830020C16Rik	BC051457	270862	intergenic
14.6703	5	chr14:67033815-67033883	AK053909	AK053909	147077	intergenic	Nefl	NM_010910	3363	5'
14.6714	5	chr14:67141818-67142080	Nef3	AK051696	63776	5'	Adam7	NM_007402	308718	intergenic
14.6889	5	chr14:68888476-68888591	BC021475	BC021475	696	1st intron	BC021475	BC021475	172	1st intron
14.6893	5	chr14:68933639-68933706	Sorbs3	BC030933	2631	Intronic	Sorbs3	BC030933	688	Intronic
14.7452	5	chr14:74520809-74520949	Slc25a30	BC022676	9598	1st intron	Slc25a30	BC022676	199	1st intron
14.7455	5	chr14:74548210-74548237	Slc25a30	NM_026232	27031	5'	Tpt1	NM_009429	31261	5'
14.7765	5	chr14:77655345-77655510	AK154108	AK154108	8993	Intronic	AK154108	AK154108	3988	Intronic
14.7851	5	chr14:78507537-78507666	Pcdh8	AK048638	2134	5'	LOC629734	NM_001037936	63266	5'
14.7899	5	chr14:78991317-78991529	Olfm4	AK133536	234408	intergenic	Pcdh17	BC079850	4262165	intergenic
14.8325	5	chr14:83255851-83255932	Pcdh17	BC079850	0	1st exon	Pcdh17	BC079850	0	1st exon
14.8554	5	chr14:85535959-85536067	Diap3	BC028920	47684	Intronic	Diap3	BC028920	67818	Intronic
14.9074	5	chr14:9074849-9074949	Fhit	BC012662	410938	Intronic	Fhit	BC012662	140381	Intronic
15.1007	5	chr15:100701286-100701321	AW493845	AK082224	49303	3'	BC099466	BC099466	60158	5'
15.101	5	chr15:100974720-100974768	Acvrl1	NM_009612	3072	3'	Acvr1b	NM_007395	27413	5'
15.1033	5	chr15:103310537-103310659	Nckap1l	BC037096	386	Intronic	Nckap1l	BC037096	949	Intronic
15.1422	5	chr15:14219763-14219916	Cdh6	AK134611	1101439	intergenic	BC052056	BC052056	4545505	intergenic
15.2506	5	chr15:25062926-25062945	Cdh12	NM_001008420	3528678	intergenic	9230109A22Rik	NM_177339	19318	3'
15.3086	5	chr15:30858155-30858171	AK085085	AK085085	3046343	intergenic	Ctnnd2	AK140960	7102	5'
15.3756	5	chr15:37566541-37566633	Ncald	NM_134094	37493	Intronic	Ncald	NM_134094	39032	Intronic
15.6619	5	chr15:66189134-66189409	AK158329	AK158329	382794	intergenic	Lrrc6	NM_019457	20255	3'
15.6819	5	chr15:6820744-6820837	Osmr	NM_011019	13198	1st intron	Osmr	NM_011019	624	1st intron
15.7439	5	chr15:74390654-74390756	Bai1	NM_174991	13393	Intronic	Bai1	AK046831	340	5'
15.756	5	chr15:75601711-75601915	Zc3h3	NM_172121	16834	Intronic	Zc3h3	NM_172121	2430	Intronic
15.7617	5	chr15:76170950-76171023	Cyc1	BC005620	39	1st intron	Cyc1	BC005620	569	1st intron
15.7618	5	chr15:76177976-76178048	Sharpin	BC055758	0	1st exon	Sharpin	NM_025340	0	1st exon
15.7653	5	chr15:76529189-76529380	Mfsd3	NM_027122	0	1st exon	Mfsd3	NM_027122	0	1st exon
15.7838	5	chr15:78376936-78377025	Sstr3	NM_009218	5380	5'	Rac2	NM_009008	9442	3'
15.7913	5	chr15:79135200-79135241	Pla2g6	NM_016915	556	Intronic	Pla2g6	NM_016915	702	Intronic
15.8003	5	chr15:80030774-80030795	Mgat3	NM_010795	29691	1st intron	Mgat3	NM_010795	7442	1st intron
15.8047	5	chr15:80470630-80470675	Grap2	NM_010815	4833	Intronic	Grap2	NM_010815	246	Intronic
15.8181	5	chr15:81812714-81812752	1700029P11Rik	NM_025503	3917	3'	D15Wsu75e	NM_134095	7043	3'
15.8406	5	chr15:84065078-84065087	Parvb	AF237770	5130	1st intron	Parvb	AF237770	33913	1st intron
15.8432	5	chr15:84325684-84325808	Parvg	NM_022321	155041	intergenic	Ldoc1l	BC094559	55416	3'
15.8866	5	chr15:88664999-88665116	Creld2	NM_029720	10610	3'	Pim3	NM_145478	24901	5'
15.9261	5	chr15:9262304-9262305	Ugt3a1	NM_207216	7902	3'	Ugt3a2	NM_144845	5465	5'
15.9797	5	chr15:97973215-97973422	Asb8	NM_030121	2474	1st intron	Asb8	NM_030121	315	1st intron
15.985	5	chr15:98501852-98501930	Rnd1	NM_172612	0	intragenic	Rnd1	NM_172612	0	intragenic
16.1117	5	chr16:11172109-11172190	Gspt1	AK134128	4273	5'	Tnfrsf17	NM_011608	55236	5'
16.1142	5	chr16:11424265-11424575	4933437K13Rik	NM_028964	63334	Intronic	4933437K13Rik	NM_028964	116	Intronic
16.1389	5	chr16:13890398-13890425	Mpv17l	AK136449	27214	3'	Ifitm7	AK076846	4867	3'
16.1431	5	chr16:14309279-14309428	Abcc1	NM_008576	1685	Intronic	Abcc1	NM_008576	574	Intronic
16.1826	5	chr16:18262207-18262463	Arvcf	NM_033474	316	1st intron	Arvcf	NM_033474	4012	1st intron
16.1879	5	chr16:18790704-18790766	Hira	NM_010435	0	1st exon	Hira	NM_010435	0	1st exon
16.2052	5	chr16:20523480-20523504	Alg3	NM_145939	863	1st intron	Alg3	NM_145939	592	1st intron
16.2192	5	chr16:21922541-21922796	Tmem41a	NM_025693	62459	5'	Senp2	NM_029457	1994	5'
16.233	5	chr16:23299822-23299852	St6gal1	NM_145933	24158	3'	Gm604	NM_001004151	44628	5'
16.275	5	chr16:27501660-27501704	Ccdc50	NM_026202	137627	intergenic	AK136620	AK136620	263479	intergenic
16.3297	5	chr16:32969609-32969753	Iqcg	NM_178378	0	intragenic	Iqcg	NM_178378	0	intragenic
16.3498	5	chr16:34981845-34981902	Ptplb	NM_023587	13388	Intronic	Ptplb	NM_023587	13478	Intronic
16.3534	5	chr16:35349319-35349635	Pdia5	NM_028295	6728	Intronic	Pdia5	NM_028295	1	Intronic
16.3546	5	chr16:35460803-35460861	Pdia5	NM_028295	50212	5'	Sema5b	BC052397	275	5'
16.4185	5	chr16:4187594-4187660	LOC436332	NM_001013830	41193	3'	Adcy9	U30602	15144	3'
16.5062	5	chr16:5062606-5062621	Ppl	NM_008909	14871	5'	Nagpa	NM_013796	47999	3'
16.568	5	chr16:5680631-5680654	5730409G15Rik	AK133590	509365	intergenic	A2bp1	BC053009	119470	intergenic
16.8358	5	chr16:8360242-8360380	4930511J11Rik	NM_029070	19854	5'	BC024814	NM_146247	25821	5'
16.8462	5	chr16:84617790-84617881	Mrpl39	NM_017404	20	5'	Jam2	AK045095	39141	5'
16.8751	5	chr16:87513991-87514114	ORF63	NM_144854	29521	3'	Bach1	NM_007520	74096	5'
16.903	5	chr16:90298163-90298164	Hunk	AK147734	8687	1st intron	Hunk	NM_015755	23208	1st intron
16.9131	5	chr16:91312506-91312537	Il10rb	AK160991	1772	Intronic	Il10rb	AK160991	1214	Intronic
16.9178	5	chr16:91780245-91780271	Itsn1	BC026532	2175	Intronic	Itsn1	BC026532	2391	Intronic
17.1473	5	chr17:14728719-14728770	9030025P20Rik	BC065801	1333	3'	Tcte3	NM_198104	3369	3'
17.2096	5	chr17:20957724-20957730	Zfp160	NM_145483	224171	intergenic	V1rf2	NM_134199	7395	5'
17.2151	5	chr17:21506301-21506331	BC029103	NM_001008501	75987	3'	MGC29393	NM_029281	16261	3'
17.2333	5	chr17:23331325-23331418	Zfp206	NM_001033425	2790	1st intron	Zfp206	NM_001033425	1754	1st intron
17.2458	5	chr17:24579101-24579109	Hagh	NM_024284	837	1st intron	Hagh	NM_024284	1224	1st intron
17.2567	5	chr17:25669590-25669622	Pigq	NM_011822	54	5'	LOC621239	NM_001039038	225	3'
17.2681	5	chr17:26813692-26813719	Itpr3	NM_080553	941	Intronic	Itpr3	NM_080553	721	Intronic
17.2734	5	chr17:27339006-27339067	Nudt3	NM_019837	14613	1st intron	Nudt3	NM_019837	11638	1st intron
17.2832	5	chr17:28318433-28318487	Srpk1	NM_016795	630	Intronic	Srpk1	NM_016795	328	Intronic
17.2886	5	chr17:28860811-28860969	Cdkn1a	NM_007669	32504	3'	9830134C10Rik	NM_001002786	1447	5'
17.3056	5	chr17:30558402-30558509	Dnahc8	AF356520	554	Intronic	Dnahc8	AF356520	2111	Intronic
17.3096	5	chr17:30964354-30964497	Ubash3a	NM_177823	140	Intronic	Ubash3a	NM_177823	1418	Intronic
17.3357	5	chr17:33566869-33566922	Vps52	NM_172620	259	1st intron	Vps52	NM_172620	487	1st intron
17.3423	5	chr17:34234397-34234604	Ppt2	NM_019441	513	Intronic	Ppt2	NM_019441	13	Intronic
17.3471	5	chr17:34711555-34711710	Bat5	NM_178592	591	3'	Ly6g5c	NM_148947	4722	5'
17.3478	5	chr17:34776077-34776287	Bat2	BC053522	3273	5'	Aif1	NM_019467	2864	3'
17.4313	5	chr17:43129865-43129891	Slc25a27	NM_028711	2558	1st intron	Slc25a27	NM_028711	75	1st intron
17.4508	5	chr17:45079791-45079869	Slc29a1	AK146265	20347	5'	Capn11	NM_001013767	13954	3'
17.462	5	chr17:46199683-46199763	Tnrc5	BC013549	0	intragenic	Tnrc5	NM_028065	0	intragenic
17.4631	5	chr17:46310063-46310214	Rpl7l1	AK090082	64295	5'	AK039293	AK039293	42267	3'
17.4638	5	chr17:46384272-46384458	Rds	AK044549	827	3'	Rds	NM_008938	2159	Intronic
17.4739	5	chr17:47394005-47394153	Foxp4	BC057110	6256	5'	AK007241	AK007241	105861	intergenic
17.5207	5	chr17:52068198-52068272	A130033B22	NM_177825	141541	intergenic	Efhb	NM_172497	795581	intergenic
17.6201	5	chr17:6204068-6204175	Tulp4	NM_054040	7018	3'	Dynlt1	BC043018	160182	intergenic
17.6399	5	chr17:6399593-6399614	BC096660	BC096660	0	intragenic	BC096660	BC096660	0	intragenic
17.654	5	chr17:65403051-65403226	E130009J12Rik	NM_001008973	3337	Intronic	E130009J12Rik	AF338468	6424	1st intron
17.6637	5	chr17:66371531-66371568	1110012J17Rik	AK147205	16854	5'	Ptprm	BC079621	200344	intergenic
17.7962	5	chr17:79622060-79622087	AK076360	AK076360	0	1st exon	Cyp1b1	AK139368	0	intragenic
17.8618	5	chr17:86182906-86183062	Prkce	AK042994	97153	3'	Prkce	NM_011104	78895	1st intron
17.8738	5	chr17:87386579-87386727	Calm2	NM_007589	31484	5'	Tacstd1	NM_008532	158399	intergenic
17.935	5	chr17:93502649-93502727	Pja2	NM_001025309	379644	intergenic	Adcyap1	NM_009625	1023	5'
18.1265	5	chr18:12646753-12646785	Npc1	NM_008720	266875	intergenic	2810439F02Rik	AK080904	139742	intergenic
18.1481	5	chr18:14813749-14813817	Ss18	BC096742	372	Intronic	Ss18	BC096742	8620	Intronic
18.2502	5	chr18:25019162-25019254	FHOS2	NM_175276	105651	Intronic	FHOS2	NM_175276	21437	Intronic
18.3005	5	chr18:3005911-3006038	No annotation yet				Crem	M60285	260378	intergenic
18.3579	5	chr18:35790713-35790842	5133400G04Rik	NM_027733	2617	5'	Dnajc18	NM_029669	9022	3'
18.3707	5	chr18:37066515-37066575	Pcdha2	NM_198117	0	1st exon	Pcdha2	NM_198117	0	1st exon
18.3782	5	chr18:37822170-37822341	Pcdhga5	NM_033588	0	1st exon	Pcdhga5	NM_033588	0	1st exon
18.3787	5	chr18:37874967-37875058	Pcdhga10	NM_033593	0	1st exon	Pcdhga10	NM_033593	0	1st exon
18.3818	5	chr18:38187210-38187422	Centd3	AK220486	63775	5'	Pcdh1	BC040402	135351	intergenic
18.4634	5	chr18:46341645-46341699	Trim36	NM_178872	3816	5'	Pggt1b	NM_172627	23606	3'
18.474	5	chr18:47395331-47395505	Sema6a	NM_018744	20503	Intronic	Sema6a	NM_018744	520	Intronic
18.5317	5	chr18:53172744-53173055	Sncaip	BC098489	131599	intergenic	Snx2	NM_026386	128833	intergenic
18.6077	5	chr18:60765614-60765937	AK154958	AK154958	16107	5'	Ndst1	NM_008306	45568	3'
18.641	5	chr18:64102579-64102631	AK154451	AK154451	41288	Intronic	AK154451	AK154451	2082	Intronic
18.6511	5	chr18:65110093-65110126	AK153754	AK153754	83910	3'	Nedd4l	AK042621	12606	1st intron
18.6594	5	chr18:65943869-65943898	Sec11l3	NM_025468	857	3'	Grp	NM_175012	54978	5'
18.6659	5	chr18:66586577-66586630	Pmaip1	NM_021451	236	Intronic	Pmaip1	NM_021451	2034	Intronic
18.8132	5	chr18:81322972-81323038	Sall3	NM_178280	174368	intergenic	Galr1	Y15004	1204578	intergenic
19.1203	5	chr19:12033101-12033117	AV312086	NM_172635	21098	3'	AK132663	AK132663	10950	5'
19.2346	5	chr19:23463012-23463242	Mamdc2	NM_174857	17096	Intronic	Mamdc2	NM_174857	51548	Intronic
19.244	5	chr19:24403913-24403946	Pip5k1a	NM_008846	32686	Intronic	Pip5k1a	NM_008846	9403	Intronic
19.3285	5	chr19:32847212-32847465	Pten	NM_008960	5242	Intronic	Pten	NM_008960	11206	Intronic
19.3636	5	chr19:36355389-36355472	Ankrd1	NM_013468	170453	intergenic	Pcgf5	NM_029508	88779	5'
19.3697	5	chr19:36968674-36968695	Ppp1r3c	BC052769	166887	intergenic	2610306H15Rik	NM_028263	14008	3'
19.4096	5	chr19:4096983-4097008	Cabp2	NM_013878	9658	3'	Cdk2ap2	NM_026373	354	5'
19.4098	5	chr19:40985018-40985116	Blnk	NM_008528	2464	Intronic	Blnk	NM_008528	2669	Intronic
19.4101	5	chr19:41012436-41012449	Blnk	NM_008528	6699	Intronic	Blnk	NM_008528	566	Intronic
19.4123	5	chr19:41226977-41227108	Tll2	NM_011904	14110	Intronic	Tll2	NM_011904	9468	Intronic
19.4452	5	chr19:44522990-44523174	Scd1	NM_009127	62218	5'	Wnt8b	AK050992	23699	5'
19.4473	5	chr19:44733210-44733319	Hif1an	NM_176958	103680	intergenic	Pax2	NM_011037	77439	5'
19.4479	5	chr19:44787271-44787484	Hif1an	NM_176958	157793	intergenic	Pax2	NM_011037	23326	5'
19.4507	5	chr19:45074180-45074258	Peo1	NM_153796	8143	3'	Lzts2	NM_145503	480	5'
19.4535	5	chr19:45349330-45349491	Lbx1	X90829	60363	5'	Btrc	NM_001037758	67650	5'
19.4546	5	chr19:45463347-45463603	Btrc	NM_009771	46278	1st intron	Btrc	NM_001037758	12967	1st intron
19.4707	5	chr19:47068398-47068455	Ina	NM_146100	0	1st exon	Ina	NM_146100	0	1st exon
19.4831	5	chr19:48312824-48312898	Sorcs3	NM_025696	52753	1st intron	Sorcs3	NM_025696	139144	1st intron
19.5191	5	chr19:51911963-51912215	Sorcs1	AK030440	1180132	intergenic	Ins1	NM_008386	405674	intergenic
19.5423	5	chr19:54229237-54229298	Adra2a	NM_007417	126973	intergenic	Gpam	NM_008149	893716	intergenic
19.546	5	chr19:5460515-5460592	AI842788	NM_198616	3004	5'	Fibp	AK028029	61	5'
19.5656	5	chr19:56558236-56558252	AK141807	AK141807	782	Intronic	Dclre1a	BC072667	24174	3'
19.8959	5	chr19:8959992-8960014	1810009A15Rik	NM_025463	2218	3'	1110055N21Rik	NM_176843	45	5'
19.8993	5	chr19:8996013-8996315	Rom1	NM_009073	0	1st exon	Rom1	NM_009073	0	1st exon
19.9547	5	chr19:9549817-9549876	Asrgl1	NM_025610	347235	intergenic	Incenp	NM_016692	389543	intergenic
X.108487842	5	chrX:108487981-108487997	9430083G14Rik	NM_026565	6475	Intronic	9430083G14Rik	NM_026565	1147	Intronic
X.139149321	5	chrX:139151224-139151251	Dcx	AK048410	27528	Intronic	Dcx	AK048410	18218	Intronic
X.156719372	5	chrX:156719836-156719933	Scml2	AK040521	118827	intergenic	Rai2	NM_198409	341846	intergenic
X.19319072	5	chrX:19319413-19319559	Slc9a7	NM_177353	0	intragenic	Slc9a7	NM_177353	0	intragenic
X.6795259	5	chrX:6795683-6795799	Syp	NM_009305	54	1st intron	Syp	NM_009305	1074	1st intron
X.6950782	5	chrX:6952083-6952203	Gripap1	NM_207670	85	Intronic	Gripap1	NM_207670	4104	Intronic
Y.1007965	5	chrY:1008680-1008763	Usp9y	NM_148943	212496	intergenic	Zfy2	NM_009571	382361	intergenic
Y.1241546	5	chrY:1242370-1242427	Usp9y	NM_148943	446173	intergenic	Zfy2	NM_009571	148684	intergenic
Y.1468037	5	chrY:1468420-1468472	Zfy2	NM_009571	13168	5'	BC111527	BC111527	478893	intergenic
Y.1614808	5	chrY:1614997-1616037	Zfy2	NM_009571	160239	intergenic	BC111527	BC111527	331822	intergenic
Y.20698	5	chrY:21324-21441	No annotation yet				Zfy1	NM_009570	40268	3'
Y.547621	5	chrY:553614-553631	Uty	AF057367	17666	Intronic	Uty	AF057367	7316	Intronic
Y.56030	5	chrY:56390-56403	No annotation yet				Zfy1	NM_009570	5254	3'
Y.604772	5	chrY:605484-605505	Ddx3y	NM_012008	1863	Intronic	Ddx3y	NM_012008	652	Intronic
Y.658002	5	chrY:659490-659577	Usp9y	NM_148943	3892	Intronic	Usp9y	NM_148943	1767	Intronic
Y.679081	5	chrY:685075-685247	Usp9y	NM_148943	6838	Intronic	Usp9y	NM_148943	1806	Intronic
1.12667	6	chr1:126673370-126673389	Dpp10	NM_199021	800281	intergenic	Actr3	NM_023735	547071	intergenic
1.1336	6	chr1:133597415-133597531	Slc26a9	NM_177243	0	intragenic	Slc26a9	NM_177243	0	intragenic
1.13458	6	chr1:134582919-134582994	Nfasc	NM_182716	13653	5'	Lrrn2	NM_010732	124943	intergenic
1.13849	6	chr1:138494754-138495063	Zfp281	NM_177643	50209	3'	Nr5a2	NM_030676	165777	intergenic
1.14787	6	chr1:147869295-147869369	Rgs18	NM_022881	1331693	intergenic	B830045N13Rik	NM_153539	388574	intergenic
1.15748	6	chr1:157484583-157484636	Lhx4	BC049834	12076	Intronic	Lhx4	BC049834	2397	Intronic
1.1603	6	chr1:160300846-160300971	Astn1	AK164117	101366	1st intron	Astn1	AK164117	8142	1st intron
1.16154	6	chr1:161538931-161538960	Tnr	NM_022312	178053	1st intron	Tnr	NM_022312	35241	1st intron
1.16205	6	chr1:162049692-162049743	Cacybp	NM_009786	263	5'	Rabgap1l	NM_001038621	6132	3'
1.16694	6	chr1:166939564-166939638	Xcl1	NM_008510	167416	intergenic	Tbx19	NM_032005	34927	3'
1.16884	6	chr1:168839067-168839125	C030014K22Rik	BC066094	593	1st intron	C030014K22Rik	BC066094	76114	1st intron
1.17738	6	chr1:177385939-177385971	Rgs7	BC051133	56780	5'	Fh1	NM_010209	52102	3'
1.17853	6	chr1:178533864-178533990	Pld5	NM_176916	421954	intergenic	AK172953	AK172953	36409	3'
1.17919	6	chr1:179189844-179189851	Akt3	NM_011785	104405	intergenic	Zfp238	NM_001012330	91487	5'
1.19276	6	chr1:192763536-192763575	AK005193	AK005193	36	5'	4833432M17Rik	AK029421	82	5'
1.195	6	chr1:195002295-195002336	G0s2	NM_008059	28499	5'	Lamb3	NM_008484	433	5'
1.19544	6	chr1:195439382-195439790	Camk1g	NM_144817	368632	intergenic	Plxna2	NM_008882	881057	intergenic
1.25308	6	chr1:25308788-25308825	AK084043	AK084043	86306	5'	Bai3	BC099951	32174	Intronic
1.37244	6	chr1:37244437-37244472	Cnga3	NM_009918	36525	3'	Inpp4a	AK149414	5	5'
1.38882	6	chr1:38884185-38884364	Nms	NM_001011684	367	1st intron	Nms	NM_001011684	1781	1st intron
1.75028	6	chr1:75029247-75029262	BC038286	AK172093	228	Intronic	BC038286	AK172093	385	Intronic
1.87421	6	chr1:87422858-87422976	5830484A20Rik	NM_175397	0	intragenic	5830484A20Rik	NM_175397	0	intragenic
1.88499	6	chr1:8850156-8850183	Sntg1	AK083241	56265	Intronic	Sntg1	AK083241	21924	Intronic
1.88981	6	chr1:88983886-88984022	Ecel1	NM_021306	578	Intronic	Ecel1	NM_021306	34	Intronic
1.89705	6	chr1:89707095-89707183	Sag	NM_009118	30811	3'	BC048957	BC048957	59312	5'
2.10482	6	chr2:104817763-104817895	Ga17	NM_145380	0	1st exon	Ga17	NM_145380	0	1st exon
2.12555	6	chr2:125550570-125550615	Cops2	NM_009939	133	5'	Galk2	NM_175154	65	5'
2.12703	6	chr2:127027943-127028025	Dusp2	NM_010090	0	1st exon	Dusp2	NM_010090	0	1st exon
2.13899	6	chr2:138990197-138990315	Btbd3	NM_001025431	1011394	intergenic	C130053K05Rik	NM_175467	195103	intergenic
2.15283	6	chr2:152830743-152830787	Hck	NM_010407	986	Intronic	Hck	NM_010407	5093	Intronic
2.15406	6	chr2:154064220-154064332	Cdk5rap1	AK136570	104	5'	Snta1	NM_009228	3491	3'
2.15861	6	chr2:158614341-158614394	Dhx35	NM_145742	64713	3'	Gm826	NM_001033411	1388473	intergenic
2.15864	6	chr2:158642799-158642967	Dhx35	NM_145742	93229	3'	Gm826	NM_001033411	1359957	intergenic
2.16084	6	chr2:160840340-160840409	Chd6	AK080927	39858	5'	Ptprt	NM_021464	378689	intergenic
2.16483	6	chr2:164834864-164834959	Cdh22	NM_174988	0	intragenic	Cdh22	NM_174988	0	intragenic
2.18013	6	chr2:180131771-180131960	Adrm1	BC019746	26172	3'	Rps21	AK010610	54920	5'
2.19166	6	chr2:19166598-19166728	AK015207	AK015207	249108	intergenic	LOC432823	BC020078	108842	Intronic
2.19316	6	chr2:19318723-19318771	Msrb2	NM_029619	6025	3'	Ptf1a	AK007922	44643	5'
2.26058	6	chr2:26059201-26059239	Qscn6l1	NM_153559	0	1st exon	Qscn6l1	NM_153559	0	1st exon
2.31745	6	chr2:31747038-31747140	Lamc3	NM_011836	371	Intronic	Lamc3	NM_011836	456	Intronic
2.90705	6	chr2:90705544-90705611	Ndufs3	NM_026688	17	5'	Kbtbd4	BC025103	44	5'
2.90979	6	chr2:90980814-90980879	Madd	AK036347	686	1st intron	Madd	AK036347	2787	1st intron
2.92235	6	chr2:92235394-92235606	Cry2	NM_009963	633	5'	Slc35c1	AK151154	18110	3'
2.93301	6	chr2:93304104-93304271	AK143789	AK143789	33477	3'	AK157592	AK157592	57218	5'
3.1462	6	chr3:146196224-146196349	Edg7	NM_022983	17596	Intronic	Edg7	NM_022983	25763	Intronic
3.22306	6	chr3:22306546-22306720	Tbl1xr1	NM_030732	38606	1st intron	Tbl1xr1	NM_030732	33380	1st intron
3.62682	6	chr3:62683072-62683100	Gpr149	NM_177346	0	intragenic	Gpr149	NM_177346	0	intragenic
3.66101	6	chr3:66103317-66103456	Ccnl1	NM_019937	57238	5'	Veph1	NM_028357	41178	3'
3.83097	6	chr3:83098596-83098647	Fgg	NM_133862	1165	Intronic	Fgg	NM_133862	68	Intronic
3.88143	6	chr3:88144398-88144402	Apoa1bp	NM_144897	0	1st exon	Apoa1bp	NM_144897	0	1st exon
4.10618	6	chr4:106176751-106176863	Ttc4	NM_028209	0	1st exon	Ttc4	NM_028209	0	1st exon
4.11533	6	chr4:115326340-115326359	Mobkl2c	NM_175308	176	1st intron	Mobkl2c	NM_175308	2804	1st intron
4.11638	6	chr4:116375934-116375953	Zswim5	NM_001029912	0	1st exon	Zswim5	NM_001029912	0	1st exon
4.11662	6	chr4:116618940-116619028	9530048O09Rik	NM_001033187	191	1st intron	9530048O09Rik	NM_001033187	1165	1st intron
4.11718	6	chr4:117180220-117180269	Dmap1	NM_023178	87	5'	Zfp393	NM_029416	75522	3'
4.11857	6	chr4:118570216-118570379	Lao1	NM_133892	103479	intergenic	Slc2a1	NM_011400	36401	5'
4.12597	6	chr4:125975438-125975497	Eif2c1	AK080954	11381	5'	Eif2c4	BC096023	19001	3'
4.12775	6	chr4:127747595-127747670	Gjb5	NM_010291	887164	intergenic	Hmgb4	NM_027036	14883	3'
4.13255	6	chr4:132549790-132549803	D4Ertd196e	BC037609	0	1st exon	D4Ertd196e	BC037609	0	1st exon
4.13545	6	chr4:135452287-135452352	E2f2	NM_177733	1702	Intronic	E2f2	NM_177733	113	Intronic
4.13551	6	chr4:135516715-135516793	Ddefl1	NM_001008232	0	intragenic	Ddefl1	NM_001008232	0	intragenic
4.13912	6	chr4:139123042-139123087	Pax7	NM_011039	18020	5'	Igsf21	NM_198610	175863	intergenic
4.14108	6	chr4:141083648-141083663	Casp9	NM_015733	0	intragenic	Casp9	NM_015733	0	intragenic
4.1449	6	chr4:144900895-144901072	Tnfrsf8	NM_009401	319149	intergenic	Rex2	BC096593	36399	5'
4.14734	6	chr4:147340156-147340362	Frap1	BC023373	135	Intronic	Frap1	BC023373	32	Intronic
4.15233	6	chr4:152326766-152326773	Gm833	NM_001033414	782047	intergenic	BC049688	BC049688	473790	intergenic
4.15239	6	chr4:152386773-152386794	Gm833	NM_001033414	842061	intergenic	BC049688	BC049688	413776	intergenic
4.15302	6	chr4:153019703-153019835	Wdr8	AK172690	7706	3'	BC039980	BC039980	88644	5'
4.43821	6	chr4:43821397-43821485	5430416O09Rik	NM_027789	65807	3'	Olfr156	NM_019474	19793	3'
4.47494	6	chr4:47494950-47495127	Alg2	NM_019998	0	1st exon	Alg2	NM_019998	0	1st exon
4.52748	6	chr4:52750027-52750295	4930547C10Rik	NM_026652	116898	intergenic	Olfr273	NM_146824	126495	intergenic
4.62976	6	chr4:62977856-62977870	Whrn	NM_028640	18634	1st intron	Whrn	NM_028640	3109	1st intron
5.11168	6	chr5:111678423-111678432	AK138421	AK138421	42393	3'	C130026L21Rik	NM_177875	143296	intergenic
5.11306	6	chr5:113064813-113064864	AK016515	AK016515	6840	Intronic	AK016515	AK016515	3440	Intronic
5.11365	6	chr5:113647716-113647764	Rutbc2	NM_172718	96718	5'	C530024P05Rik	NM_177292	83313	5'
5.11464	6	chr5:114641554-114641597	Kctd10	NM_026145	105	5'	Ube3b	NM_054093	29	5'
5.11589	6	chr5:115892776-115892864	BC061108	BC061108	15	5'	Rab35	NM_198163	164	5'
5.11611	6	chr5:116105853-116106017	Rpl29	BC094039	42740	5'	Cit	AF086824	706	5'
5.11906	6	chr5:119057320-119057350	Thrap2	NM_172424	33325	3'	Tbx3	NM_011535	873949	intergenic
5.12608	6	chr5:126079957-126079964	Aacs	NM_030210	273096	intergenic	AK157823	AK157823	1451068	intergenic
5.12785	6	chr5:127850470-127850535	AK157823	AK157823	6482	Intronic	AK157823	AK157823	1605	Intronic
5.13496	6	chr5:134957427-134957551	Limk1	U14166	82	Intronic	Limk1	U14166	148	Intronic
5.13724	6	chr5:137237752-137237772	Rabl5	NM_026073	39892	3'	Fis1	NM_025562	8951	5'
5.14008	6	chr5:140079399-140079417	1810042K04Rik	NM_025604	107	5'	A930017N06Rik	NM_175522	81007	5'
5.14626	6	chr5:146262240-146262436	Cyp3a11	NM_007818	78250	5'	Cyp3a25	NM_019792	19111	3'
5.1501	6	chr5:150103278-150103488	Hsp110	NM_013559	198786	intergenic	Lgr8	NM_080468	183669	intergenic
5.21373	6	chr5:21375724-21375849	Slc26a5	NM_030727	1956	1st intron	Slc26a5	NM_030727	1566	1st intron
5.2191	6	chr5:21911153-21911230	Reln	AK042773	54662	5'	Orc5l	NM_011959	87121	3'
5.22454	6	chr5:22455333-22455508	Orc5l	NM_011959	393278	intergenic	AK134880	AK134880	108906	intergenic
5.24038	6	chr5:24039806-24039814	Gbx1	NM_015739	2897	5'	Asb10	NM_080444	2950	3'
5.26866	6	chr5:26866539-26866579	AK016349	AK016349	42494	5'	Dpp6	NM_010075	281583	intergenic
5.29029	6	chr5:29031712-29031878	Shh	NM_009170	233920	intergenic	Rnf32	NM_021470	495068	intergenic
5.31115	6	chr5:31118754-31118782	AK137355	AK137355	23710	3'	Mapre3	NM_133350	19618	1st intron
5.31803	6	chr5:31803580-31803580	Supt7l	AK047063	268	5'	Slc4a1ap	BC090964	442	5'
5.3444	6	chr5:34441098-34441180	Poln	NM_181857	1486	Intronic	Poln	NM_181857	4819	Intronic
5.37569	6	chr5:37569868-37569908	Crmp1	U72875	1016	Intronic	Crmp1	U72875	1211	Intronic
5.3846	6	chr5:38462196-38462467	Nsg1	NM_010942	14615	5'	Zfp509	NM_029162	25961	3'
5.38766	6	chr5:38766205-38766370	Slc2a9	NM_001012363	545	1st intron	Slc2a9	AK156740	1999	1st intron
5.54098	6	chr5:54097778-54097873	Cckar	NM_009827	101475	intergenic	Tbc1d19	NM_144517	100	5'
5.62427	6	chr5:62426882-62426947	Pcdh7	NM_018764	4409230	intergenic	AK034089	AK034089	1501559	intergenic
5.63965	6	chr5:63968212-63968412	AK034089	AK034089	37894	Intronic	AK034089	AK034089	35979	Intronic
5.89019	6	chr5:8902376-8902412	Abcb4	NM_008830	2224	Intronic	Abcb4	NM_008830	183	Intronic
5.99824	6	chr5:99824728-99824757	Rasgef1b	BC052726	331622	intergenic	AK015871	AK015871	98557	5'
6.11334	6	chr6:113343508-113343582	Tada3l	NM_133932	248	5'	Arpc4	NM_026552	345	5'
6.11514	6	chr6:115144316-115144459	Syn2	BC053427	43308	1st intron	Syn2	BC053427	57244	1st intron
6.11557	6	chr6:115567350-115567424	Tsen2	NM_199033	23434	3'	Mkrn2	NM_023290	199	5'
6.12723	6	chr6:127235393-127235472	Ccnd2	NM_009829	118765	intergenic	AK136714	AK136714	48526	5'
6.13841	6	chr6:138408070-138408130	Lmo3	NM_207222	27276	Intronic	Lmo3	NM_207222	45003	Intronic
6.14639	6	chr6:146394205-146394384	Itpr2	NM_019923	10554	Intronic	Itpr2	NM_019923	39561	Intronic
6.31916	6	chr6:31916549-31916708	Podxl	NM_013723	422554	intergenic	1700012A03Rik	NM_029587	63821	5'
6.33067	6	chr6:33068136-33068151	Chchd3	AK145337	77785	5'	Exoc4	AK014499	111141	intergenic
6.39363	6	chr6:39364357-39364606	AK076873	AK076873	13582	3'	Dennd2a	BC057310	27502	3'
6.44988	6	chr6:44988764-44988914	Tpk1	NM_013861	1393057	intergenic	Cntnap2	NM_001004357	854	5'
6.48128	6	chr6:48129696-48129809	AI894139	NM_178898	234869	intergenic	A930040G15Rik	AB041543	195446	intergenic
6.69055	6	chr6:69055642-69055648	Tacstd2	NM_020047	1590271	intergenic	BC080787	BC080787	1481362	intergenic
6.81781	6	chr6:81780996-81781081	Lrrtm4	BC037216	1041398	intergenic	AW146020	NM_177884	108287	intergenic
6.87965	6	chr6:87968288-87968512	Rab7	NM_009005	2229	Intronic	Rab7	NM_009005	1410	Intronic
6.96386	6	chr6:96386135-96386156	1700123L14Rik	NM_030107	254477	intergenic	C630007B19Rik	NM_182808	102651	Intronic
7.10024	6	chr7:100245948-100246023	Ppme1	NM_028292	6	5'	AK143876	AK143876	87511	3'
7.10957	6	chr7:109572726-109572755	Nrip3	NM_020610	18	5'	Nrip3	BC072641	363	1st intron
7.11263	6	chr7:112632012-112632019	Tead1	BC060138	1354	Intronic	Tead1	AK140307	1052	Intronic
7.11779	6	chr7:117792430-117792476	Nucb2	NM_016773	1460750	intergenic	Rps15a	NM_170669	103072	intergenic
7.11915	6	chr7:119147540-119147606	Gprc5b	NM_022420	361269	intergenic	Gp2	AK009843	86116	3'
7.12022	6	chr7:120217919-120217958	Abca16	AK144723	17023	1st intron	Abca16	AK144723	4317	1st intron
7.12478	6	chr7:124780795-124780986	AK086648	AK086648	641022	intergenic	AK015957	AK015957	328615	intergenic
7.12848	6	chr7:128479109-128479173	Inpp5f	NM_178641	2709	Intronic	Inpp5f	BC067200	1016	5'
7.12873	6	chr7:128729350-128729381	Sec23ip	NM_001029982	154431	intergenic	Brwd2	AK170058	653699	intergenic
7.1347	6	chr7:134702649-134702709	AK016590	AK016590	522350	intergenic	AK140373	AK140373	34697	3'
7.13751	6	chr7:137509603-137509680	Txnl2	NM_023140	202704	intergenic	Tcerg1l	NM_183289	587287	intergenic
7.13778	6	chr7:137783010-137783099	Txnl2	NM_023140	476117	intergenic	Tcerg1l	NM_183289	313874	intergenic
7.13968	6	chr7:139679196-139679454	AK029726	AK029726	144191	intergenic	BC056493	BC056493	12388	5'
7.14007	6	chr7:140070933-140071224	E430002D04Rik	NM_172909	1130	1st intron	E430002D04Rik	NM_172909	612	1st intron
7.14053	6	chr7:140527720-140527814	Olfr61	NM_146964	37809	3'	Cyp2e1	NM_021282	87383	5'
7.14088	6	chr7:140886198-140886249	Ifitm6	NM_001033632	18011	5'	B4galnt4	BC038881	35370	5'
7.14176	6	chr7:141759806-141760010	Brsk2	NM_001009930	339	1st intron	Brsk2	NM_001009930	31017	1st intron
7.2324	6	chr7:23242120-23242145	Nalp5	AY329485	91450	3'	V1rd7	BC111911	98614	5'
7.24573	6	chr7:24576376-24576468	Lypd4	NM_182785	248	1st intron	Lypd4	NM_182785	1865	1st intron
7.25368	6	chr7:25367921-25367929	Exosc5	NM_138586	0	1st exon	Exosc5	NM_138586	0	1st exon
7.28047	6	chr7:28047287-28047389	Supt5h	NM_013676	143	1st intron	Supt5h	NM_013676	115	1st intron
7.28811	6	chr7:28813743-28813754	Map4k1	AK143215	101712	intergenic	AK081432	AK081432	17638	3'
7.2996	6	chr7:29961061-29961082	BC054747	BC054747	667	Intronic	BC054747	BC054747	3	Intronic
7.63837	6	chr7:63839314-63839351	Klf13	NM_021366	21525	5'	Trpm1	NM_001039104	193544	intergenic
7.78367	6	chr7:78371705-78371761	Ntrk3	AF035399	20288	Intronic	Ntrk3	AF035399	18507	Intronic
7.90334	6	chr7:90335667-90335679	1810020E01Rik	NM_025460	3273	5'	1110001A23Rik	NM_026734	8350	3'
8.11018	6	chr8:110182315-110182318	1810044O22Rik	BC054749	105717	intergenic	Nfat5	AK134022	281	5'
8.11422	6	chr8:114224898-114224943	BC023755	BC023755	70	5'	Fa2h	NM_178086	6892	3'
8.11995	6	chr8:119951724-119951738	Pkd1l2	AK007293	36911	5'	Bcmo1	NM_021486	30109	5'
8.1252	6	chr8:125203945-125204183	Zfpm1	NM_009569	10333	Intronic	Zfpm1	NM_009569	5724	Intronic
8.12546	6	chr8:125461059-125461340	Aprt	NM_009698	82	Intronic	Aprt	NM_009698	26	Intronic
8.12566	6	chr8:125661515-125661589	Cbfa2t3h	NM_009824	76485	5'	BC021611	AK141579	22	5'
8.12593	6	chr8:125930868-125931051	BC068270	BC068270	70096	5'	Spg7	NM_153176	20308	5'
8.12702	6	chr8:12702512-12702540	Tubgcp3	AK165503	30426	5'	AK143914	AK143914	4393	3'
8.12949	6	chr8:129492585-129492619	1810063B05Rik	NM_174987	181078	intergenic	A630001O12Rik	NM_001033546	232719	intergenic
8.20401	6	chr8:20401471-20401650	A430108E01Rik	AK166663	89730	5'	LOC436177	NM_001024708	4955	Intronic
8.24214	6	chr8:24214541-24214601	Ikbkb	NM_010546	42463	5'	Plat	NM_008872	8740	5'
8.25551	6	chr8:25551446-25551652	Zmat4	NM_177086	22903	3'	Zmat4	AK140391	46157	Intronic
8.33947	6	chr8:3395170-3395352	Arhgef18	NM_133962	2159	1st intron	Arhgef18	NM_133962	32086	1st intron
8.36029	6	chr8:3603634-3603690	2310057J16Rik	NM_027171	0	intragenic	2310057J16Rik	NM_027171	0	intragenic
8.58371	6	chr8:58371251-58371281	Gpm6a	NM_153581	1811699	intergenic	Adam29	NM_175939	391786	intergenic
8.58832	6	chr8:58832808-58832912	Adam29	NM_175939	33770	5'	Glra3	AY230204	167	5'
8.72017	6	chr8:72017420-72017621	Slc18a1	NM_153054	11268	1st intron	Atp6v1b2	NM_007509	251	5'
8.8736	6	chr8:87361460-87361582	Cacna1a	AK147277	8591	Intronic	Cacna1a	AK147277	43545	Intronic
8.90416	6	chr8:90421354-90421441	Cbln1	NM_019626	58996	5'	4933402J07Rik	NM_177901	32613	5'
9.10372	6	chr9:103724131-103724184	Tmem108	NM_178638	104190	intergenic	Nphp3	NM_028721	136790	intergenic
9.1051	6	chr9:105102315-105102503	Nek11	NM_172461	0	intragenic	Nek11	NM_172461	0	intragenic
9.10517	6	chr9:105167707-105167787	Nek11	NM_172461	9247	Intronic	Nek11	NM_172461	3766	Intronic
9.10719	6	chr9:107196516-107196525	Hemk1	NM_133984	124	5'	6430571L13Rik	NM_175486	2219	5'
9.11071	6	chr9:110715751-110715880	Tmie	NM_146260	251	Intronic	Tmie	NM_146260	2795	Intronic
9.11257	6	chr9:112575518-112575664	Arpp21	AK029467	495861	intergenic	Pdcd6ip	BC026823	927577	intergenic
9.11304	6	chr9:113042153-113042253	Arpp21	AK029467	962473	intergenic	Pdcd6ip	BC026823	460965	intergenic
9.11341	6	chr9:113407235-113407301	Arpp21	AK029467	1327538	intergenic	Pdcd6ip	BC026823	95900	3'
9.21343	6	chr9:21343227-21343318	1810026J23Rik	NM_178619	0	1st exon	1810026J23Rik	NM_178619	0	1st exon
9.21804	6	chr9:21804213-21804320	Elavl3	NM_010487	1854	5'	Zfp653	NM_177318	1594	3'
9.27115	6	chr9:27116908-27116955	Jam3	NM_023277	212105	intergenic	Spata19	NM_029299	29334	5'
9.29542	6	chr9:29542562-29542563	Hnt	BC023307	381363	intergenic	Hnt	AK140516	169727	1st intron
9.44633	6	chr9:44633794-44633847	BC021608	NM_138951	79874	5'	Atp5l	NM_013795	30447	3'
9.45069	6	chr9:45070110-45070181	Tmprss13	NM_001013373	0	1st exon	Tmprss13	NM_001013373	0	1st exon
9.5071	6	chr9:50710359-50710454	Snf1lk2	AK028526	22599	Intronic	Snf1lk2	AK028526	37430	Intronic
9.67769	6	chr9:67772025-67772035	AK030931	AK030931	0	intragenic	AK030931	AK030931	0	intragenic
9.68504	6	chr9:68507039-68507064	Rora	AK086033	42920	3'	9530091C08Rik	NM_177159	57457	5'
9.743	6	chr9:74300246-74300316	Wdr72	AK052055	263613	intergenic	Onecut1	NM_008262	348241	intergenic
9.89107	6	chr9:89107207-89107220	Mthfs	NM_026829	69095	3'	AF529169	NM_153509	280711	intergenic
9.97467	6	chr9:97467331-97467352	Clstn2	NM_022319	74291	Intronic	Clstn2	NM_022319	141357	Intronic
10.1101	6	chr10:110080808-110080818	Syt1	NM_009306	1666084	intergenic	E2f7	AK051521	68760	5'
10.1154	6	chr10:115423422-115423550	Ptprr	D31898	564	1st intron	Ptprr	D31898	28720	1st intron
10.1227	6	chr10:122662416-122662460	Usp15	AK164382	62437	5'	AI851790	NM_182807	4696	5'
10.1271	6	chr10:127106518-127106634	BC030440	AK129110	2580	3'	Tac2	NM_009312	20849	5'
10.1272	6	chr10:127217090-127217100	Rdh16	NM_009040	0	intragenic	Rdh16	NM_009040	0	intragenic
10.1633	6	chr10:16335215-16335315	AK018698	AK018698	1926853	intergenic	Cited2	NM_010828	1077395	intergenic
10.2064	6	chr10:20642018-20642254	Ahi1	NM_026203	0	1st exon	Ahi1	NM_026203	0	1st exon
10.4078	6	chr10:40777317-40777443	Gpr6	AK139367	16680	5'	A530089I17Rik	NM_133999	99205	3'
10.4225	6	chr10:42250835-42250914	Nr2e1	NM_152229	0	intragenic	Nr2e1	NM_152229	0	intragenic
10.7711	6	chr10:77117274-77117531	Ube2g2	NM_019803	27696	3'	Krtap12-1	NM_010670	46898	5'
10.809	6	chr10:80901613-80901704	Edg6	NM_010102	0	1st exon	Edg6	NM_010102	0	1st exon
10.8093	6	chr10:80927042-80927073	Gna15	NM_010304	0	1st exon	Gna15	NM_010304	0	1st exon
10.8232	6	chr10:82320295-82320309	Txnrd1	BC037643	0	intragenic	Txnrd1	BC037643	0	intragenic
10.9031	6	chr10:90310670-90310801	E030041M21Rik	NM_029166	1062536	intergenic	Apaf1	AK220340	108380	intergenic
10.9442	6	chr10:94421080-94421266	4921537D05Rik	BC070464	201038	intergenic	Cradd	BC005608	183255	intergenic
10.947	6	chr10:94705362-94705381	Cradd	NM_009950	99705	Intronic	Cradd	AK144648	35211	3'
10.9515	6	chr10:95150502-95150509	Nudt4	NM_027722	156671	intergenic	Eea1	NM_001001932	219844	intergenic
11.1088	6	chr11:108827928-108827941	Axin2	NM_015732	61065	3'	Rgs9	NM_011268	213509	intergenic
11.1153	6	chr11:115276901-115277194	4933422H20Rik	NM_001033775	12689	3'	Armc7	NM_177778	14718	5'
11.1169	6	chr11:116853726-116853767	Mgat5b	NM_172948	50714	3'	Sec14l1	BC005766	77580	5'
11.1172	6	chr11:117230985-117231153	Sept9	AK122415	52669	3'	LOC432615	NM_001004166	69387	5'
11.1187	6	chr11:118743338-118743376	D11Bwg0517e	BC054403	15670	5'	Enpp7	AK144474	60917	5'
11.1194	6	chr11:119356304-119356313	Nptx1	NM_008730	0	intragenic	Nptx1	NM_008730	0	intragenic
11.1213	6	chr11:121286927-121287136	Tbcd	NM_029878	9134	Intronic	Tbcd	NM_029878	4596	Intronic
11.1695	6	chr11:16951192-16951343	Plek	NM_019549	42562	5'	1500041B16Rik	NM_029861	668	5'
11.3593	6	chr11:35933641-35933735	Odz2	NM_011856	11695	Intronic	Odz2	NM_011856	16452	Intronic
11.5069	6	chr11:50694934-50694976	9630041N07Rik	NM_173387	9980	5'	Grm6	NM_173372	5290	5'
11.5725	6	chr11:57250529-57250551	Nmur2	NM_153079	1366130	intergenic	1810073G14Rik	NM_026342	48653	3'
11.5868	6	chr11:5868542-5868577	0610042I15Rik	NM_019661	778	3'	Camk2b	BC080273	1106	3'
11.594	6	chr11:59400888-59401034	Olfr222	NM_001011789	13028	5'	AA536749	NM_201245	77764	5'
11.6065	6	chr11:60646704-60646739	Shmt1	NM_009171	19261	5'	Dhrs7b	NM_145428	159	5'
11.6166	6	chr11:6167770-6167869	Ddx56	NM_026538	87	5'	Tmed4	NM_134020	2896	3'
11.6553	6	chr11:65529217-65529227	Map2k4	BC029833	730	Intronic	Map2k4	BC029833	6455	Intronic
11.682	6	chr11:68201572-68201607	Ntn1	NM_008744	0	1st exon	Ntn1	NM_008744	0	1st exon
11.7121	6	chr11:71205871-71205906	6330403K07Rik	NM_134022	356238	intergenic	9230020A06Rik	NM_001033803	126841	intergenic
11.7763	6	chr11:77637095-77637104	Myo18a	AK171342	43	Intronic	Myo18a	AK171342	136	Intronic
11.7772	6	chr11:77725964-77726046	Pipox	NM_008952	16029	5'	AK036145	AK036145	2315	3'
11.778	6	chr11:77796641-77796750	Sez6	AK147705	1460	3'	Phf12	AK170155	2227	5'
11.7831	6	chr11:78312256-78312318	A830091I15Rik	NM_172795	4907	1st intron	A830091I15Rik	NM_172795	895	1st intron
11.8011	6	chr11:80112067-80112102	Rhot1	AK141621	28394	3'	Rhbdl4	NM_139228	5185	5'
11.807	6	chr11:80702875-80702892	Accn1	NM_001034013	1	Intronic	Accn1	NM_001034013	3043	Intronic
11.813	6	chr11:81302730-81302756	Accn1	NM_007384	333645	intergenic	1700071K01Rik	NM_001033765	85952	3'
11.844	6	chr11:84407418-84407452	Lhx1	NM_008498	65706	5'	Mrm1	NM_145433	221821	intergenic
11.9569	6	chr11:95692026-95692059	B4galnt2	NM_008081	2004	Intronic	B4galnt2	NM_008081	144	Intronic
11.9574	6	chr11:95742755-95742777	B4galnt2	NM_008081	11805	5'	Igf2bp1	NM_009951	36054	3'
11.9657	6	chr11:96566923-96567031	Scap1	AK137792	18448	3'	Scap1	NM_001033186	3142	Intronic
12.1036	6	chr12:103605904-103605904	Prima1	AK021000	1970	5'	Prima1	NM_133364	30730	Intronic
12.1063	6	chr12:106256376-106256433	Papola	AK090096	16415	3'	Vrk1	NM_011705	154907	intergenic
12.1088	6	chr12:108775970-108776193	Ccnk	AK146711	124915	intergenic	Cyp46a1	NM_010010	6105	5'
12.1109	6	chr12:110937864-110937882	Ppp2r5c	BC003979	4114	1st intron	Ppp2r5c	BC003979	32423	1st intron
12.1129	6	chr12:112908416-112908417	A730018C14Rik	NM_176956	37396	5'	A530016L24Rik	NM_177039	28857	5'
12.1136	6	chr12:113591602-113591831	Crip2	NM_024223	297	Intronic	Crip2	NM_024223	105	Intronic
12.1305	6	chr12:13054186-13054310	Mycn	NM_008709	86554	5'	Ddx1	NM_134040	191046	intergenic
12.2922	6	chr12:29222262-29222299	Rps7	NM_011300	87	5'	Rnaseh1	NM_011275	13634	5'
12.5332	6	chr12:53318318-53318367	BC062175	BC062175	85771	3'	AK131622	AK131622	107248	intergenic
12.7669	6	chr12:76686945-76687132	Sgpp1	AK154116	32508	5'	AK052521	AK052521	50150	5'
12.7783	6	chr12:77825739-77825848	Fntb	NM_145927	0	intragenic	Fntb	NM_145927	0	intragenic
12.8488	6	chr12:84885139-84885175	Acot2	NM_134188	1536	3'	Acot1	NM_012006	14094	5'
12.856	6	chr12:85599953-85599966	Tmem90a	NM_001033334	11404	5'	Npc2	NM_023409	44346	3'
12.8708	6	chr12:87078903-87078957	1700019E19Rik	BC038915	27369	3'	1700020O03Rik	AK031712	52046	5'
12.8736	6	chr12:87359692-87359758	Esrrb	NM_011934	67	Intronic	Esrrb	NM_011934	17923	Intronic
13.1016	6	chr13:101592825-101592896	Gtf2h2	AK078297	24	5'	Ocln	NM_008756	4762	3'
13.1066	6	chr13:106563153-106563237	AK013941	AK013941	147995	intergenic	Htr1a	NM_008308	951	5'
13.1114	6	chr13:111369604-111369621	Rab3c	NM_023852	67637	Intronic	Rab3c	NM_023852	11743	Intronic
13.116	6	chr13:11600122-11600220	Chrm3	NM_033269	1240122	intergenic	Ryr2	BC043140	225026	intergenic
13.1756	6	chr13:17559580-17559631	AK173265	AK173265	1506	1st intron	AK173265	AK173265	28973	1st intron
13.2127	6	chr13:21267251-21267439	Trim27	BC085503	67017	3'	Gpx5	NM_010343	26551	3'
13.3587	6	chr13:35872729-35872817	Cdyl	BC062123	1899	Intronic	Cdyl	BC062123	6268	Intronic
13.4614	6	chr13:46141237-46141315	AK017206	AK017206	163804	intergenic	AK028988	AK028988	45122	3'
13.4817	6	chr13:48171119-48171180	AK016490	AK016490	140604	intergenic	Id4	NM_031166	102216	intergenic
13.4916	6	chr13:49159692-49159762	AK147550	AK147550	0	1st exon	AK147550	AK147550	0	1st exon
13.546	6	chr13:54599989-54600044	Higd2a	NM_025933	0	1st exon	Higd2a	NM_025933	0	1st exon
13.5497	6	chr13:5496942-5496989	LOC432723	NM_001004168	661234	intergenic	Klf6	NM_011803	363768	intergenic
13.5601	6	chr13:56006190-56006287	Pitx1	NM_011097	165191	intergenic	H2afy	BC006955	77558	3'
13.5799	6	chr13:57988794-57988975	Spock1	AK039058	70947	5'	AK019388	AK019388	147901	intergenic
13.5959	6	chr13:59594738-59594818	Agtpbp1	BC048468	27858	5'	Mak10	NM_030153	254	5'
13.6063	6	chr13:60626092-60626112	Dapk1	AY245540	13883	Intronic	Dapk1	AY245540	79750	Intronic
13.7036	6	chr13:70364031-70364088	D13Wsu50e	NM_138596	80593	3'	BC026613	BC026613	692007	intergenic
13.9192	6	chr13:9193972-9194089	Larp5	NM_172585	21696	3'	BC066797	BC066797	414178	intergenic
13.9537	6	chr13:9537499-9537551	Larp5	NM_172585	365191	intergenic	BC066797	BC066797	70683	5'
13.9598	6	chr13:95979211-95979265	Otp	NM_011021	1017	Intronic	Otp	NM_011021	4549	Intronic
14.1215	6	chr14:121457494-121457696	Clybl	NM_029556	10985	Intronic	Clybl	NM_029556	48824	Intronic
14.1918	6	chr14:19177269-19177288	Dnajc9	NM_134081	0	1st exon	Dnajc9	NM_134081	0	1st exon
14.2423	6	chr14:24227588-24227657	AK131726	AK131726	480998	intergenic	Rai17	BC058646	64827	5'
14.2931	6	chr14:29308512-29308546	Cacna1d	AB086123	126511	intergenic	Dcp1a	NM_133761	90	5'
14.3129	6	chr14:31296555-31296677	Chat	NM_009891	1698	5'	AK048416	AK048416	102524	intergenic
14.597	6	chr14:59705816-59705874	AK151394	AK151394	0	intragenic	AK151394	AK151394	0	intragenic
14.6143	6	chr14:61435700-61435809	Gucy1b2	AK047129	25355	5'	Ddx26	NM_008715	194682	intergenic
14.6548	6	chr14:65482210-65482281	Stmn4	NM_019675	166456	intergenic	Adra1a	AK085653	107114	intergenic
14.6644	6	chr14:66443778-66443811	AK133440	AK133440	52513	5'	Cdca2	NM_175384	186155	intergenic
14.6939	6	chr14:69394072-69394138	Npm2	NM_181345	5941	5'	Xpo7	NM_023045	5818	3'
14.7226	6	chr14:72259094-72259148	Nudt15	NM_172527	1472	Intronic	Nudt15	NM_172527	92	Intronic
14.741	6	chr14:74101026-74101027	3110050K21Rik	NM_026083	22445	3'	Nurit	NM_026457	216004	intergenic
14.7852	6	chr14:78519854-78519942	Pcdh8	AK048638	14431	5'	LOC629734	NM_001037936	50969	5'
15.2579	6	chr15:25795528-25795557	1810015C04Rik	NM_001034851	7205	1st intron	1810015C04Rik	NM_001034851	38662	1st intron
15.3137	6	chr15:31374677-31374756	5730557B15Rik	AK156757	62401	5'	Ropn1l	BC048680	11084	3'
15.4803	6	chr15:48030775-48030848	AK016069	AK016069	1560879	intergenic	AK140264	AK140264	53603	3'
15.6213	6	chr15:62126918-62127000	AK090048	AK090048	54732	Intronic	AK090048	AK090048	16075	Intronic
15.6826	6	chr15:68260315-68260408	Rpl21	BC096572	120361	intergenic	Khdrbs3	NM_010158	497726	intergenic
15.7246	6	chr15:72466287-72466400	1810044A24Rik	NM_180662	48248	Intronic	1810044A24Rik	NM_180662	46194	Intronic
15.7398	6	chr15:73980060-73980324	Gm628	NM_001033365	313266	intergenic	Bai1	NM_174991	363745	intergenic
15.7491	6	chr15:74914029-74914073	Ly6c	NM_010741	37966	5'	Ly6c	D86232	21360	3'
15.7558	6	chr15:75579872-75579926	Rhpn1	BC052010	38237	3'	Zc3h3	NM_172121	1801	3'
15.7643	6	chr15:76434812-76434901	Cpsf1	NM_053193	47	5'	Slc39a4	NM_028064	4781	3'
15.7789	6	chr15:77893938-77894024	Cacng2	NM_007583	53330	1st intron	Cacng2	NM_007583	51953	1st intron
15.8168	6	chr15:81683785-81683834	Tob2	NM_020507	4409	5'	Tob2	AK013833	1121	3'
15.836	6	chr15:83603854-83603907	Scube1	AK041590	51093	5'	Mpped1	NM_172610	3907	5'
15.84	6	chr15:84006439-84006474	Adpn	NM_054088	1814	Intronic	Adpn	NM_054088	488	Intronic
15.8717	6	chr15:87169786-87169951	Tbc1d22a	NM_145476	843599	intergenic	AW049604	NM_134096	283126	intergenic
15.8724	6	chr15:87244890-87244927	Tbc1d22a	NM_145476	918639	intergenic	AW049604	NM_134096	208086	intergenic
15.88	6	chr15:88002302-88002326	AW049604	NM_134096	415186	intergenic	Zdhhc25	NM_027306	425752	intergenic
15.8811	6	chr15:88116622-88116652	AW049604	NM_134096	529509	intergenic	Zdhhc25	NM_027306	311429	intergenic
15.8845	6	chr15:88457312-88457390	Zdhhc25	NM_027306	28043	3'	Brd1	NM_001033274	69264	3'
15.8925	6	chr15:89247409-89247474	Cpt1b	NM_009948	319	Intronic	Cpt1b	NM_009948	216	Intronic
15.9429	6	chr15:94291636-94291668	Adamts20	NM_177431	59214	5'	3000003F02Rik	NM_172437	59166	3'
16.1071	6	chr16:10710195-10710232	Prm1	NM_013637	0	1st exon	Prm1	NM_013637	0	1st exon
16.1678	6	chr16:16784243-16784317	Vpreb1	NM_016982	1467	5'	Top3b	AB045324	98	5'
16.1781	6	chr16:17813923-17813973	Tssk2	NM_009436	362	3'	Es2el	BC013711	324	3'
16.2068	6	chr16:20678996-20679062	Chrd	NM_009893	23104	3'	2310042E22Rik	NM_025634	387621	intergenic
16.2867	6	chr16:28672955-28672971	Fgf12	NM_010199	25	5'	1600021P15Rik	BC085092	72960	3'
16.3022	6	chr16:30219821-30219860	Lrrc15	NM_028973	16868	5'	Gp5	NM_008148	7598	3'
16.3135	6	chr16:31349207-31349349	Bdh1	NM_175177	7019	1st intron	Bdh1	NM_175177	8459	1st intron
16.3655	6	chr16:36548154-36548414	Cd86	S70108	26	1st intron	Cd86	S70108	36901	1st intron
16.4834	6	chr16:48345191-48345259	Dppa2	NM_028615	106090	intergenic	Morc1	NM_010816	5636	5'
16.5808	6	chr16:5808612-5808700	A2bp1	NM_021477	7471	1st intron	A2bp1	NM_021477	280268	1st intron
16.6264	6	chr16:6264275-6264383	A2bp1	NM_021477	175341	Intronic	A2bp1	NM_021477	138809	Intronic
16.8551	6	chr16:8553296-8553322	Pmm2	AK012683	160	1st intron	Pmm2	AK012683	4748	1st intron
16.8878	6	chr16:8879658-8879828	AK163088	AK163088	111270	intergenic	Grin2a	NM_008170	611520	intergenic
16.9188	6	chr16:91879972-91879995	Atp5o	NM_138597	59499	5'	Mrps6	NM_080456	67210	5'
16.9497	6	chr16:94975232-94975525	Kcnj6	NM_001025584	33361	Intronic	Kcnj6	AK044218	3444	Intronic
16.951	6	chr16:95104765-95104810	Kcnj6	NM_010606	54760	1st intron	Kcnj6	NM_010606	1196	1st intron
16.956	6	chr16:95603268-95603269	Erg	AK142379	35147	5'	Erg	NM_133659	30055	Intronic
17.1277	6	chr17:12767551-12767641	Acat3	NM_153151	0	intragenic	Acat3	NM_153151	0	intragenic
17.246	6	chr17:24601421-24601468	Hagh	NM_024284	9396	3'	Igfals	NM_008340	4924	5'
17.2871	6	chr17:28712617-28712693	Stk38	AK035731	994	Intronic	Stk38	AK035731	2982	Intronic
17.3038	6	chr17:30385426-30385489	Dnahc8	AK161258	0	intragenic	Dnahc8	AK161258	0	intragenic
17.3133	6	chr17:31333699-31333782	Pknox1	NM_016670	0	intragenic	Pknox1	NM_016670	0	intragenic
17.3156	6	chr17:31561218-31561308	Cryaa	BC092385	150831	intergenic	Snf1lk	NM_010831	11702	3'
17.3473	6	chr17:34735283-34735308	Bat4	BC057902	2425	3'	Apom	NM_018816	1757	3'
17.356	6	chr17:35600234-35600238	Gna-rs1	BC010298	3317	3'	H2-T23	BC099472	37790	3'
17.4663	6	chr17:46629861-46629922	Ubr2	AK143202	156168	intergenic	Trerf1	AK042320	45685	5'
17.4838	6	chr17:48379187-48379201	Unc5cl	AK039924	373913	intergenic	Lrfn2	NM_027452	18750	5'
17.4838	6	chr17:48383168-48383188	Unc5cl	AK039924	377897	intergenic	Lrfn2	NM_027452	14766	5'
17.5018	6	chr17:5019018-5019108	AK156149	AK156149	118748	intergenic	5730437N04Rik	BC019420	348287	intergenic
17.5229	6	chr17:52289240-52289325	A130033B22	NM_177825	362588	intergenic	Efhb	NM_172497	574534	intergenic
17.5555	6	chr17:55552342-55552351	Ebi3	NM_015766	2032	3'	2900016D05Rik	NM_028381	119	5'
17.6634	6	chr17:66346215-66346260	1110012J17Rik	AK147205	2901	1st intron	1110012J17Rik	AK147205	7023	1st intron
17.7579	6	chr17:7579375-7579384	AK018056	AK018056	323111	intergenic	Tagap1	NM_145968	184813	intergenic
17.8472	6	chr17:84729074-84729146	Lrpprc	NM_028233	30269	5'	Ppm1b	NM_011151	137229	intergenic
17.8826	6	chr17:8827504-8827740	1700010I14Rik	NM_025851	1027	1st intron	1700010I14Rik	NM_025851	2596	1st intron
18.3497	6	chr18:34976074-34976194	Reep2	NM_144865	2706	3'	Egr1	M22326	9661	5'
18.3633	6	chr18:36331717-36331857	Psd2	BC066026	191100	intergenic	Pura	NM_008989	75347	5'
18.3831	6	chr18:38311297-38311329	Centd3	AK220486	187772	intergenic	Pcdh1	BC040402	11354	3'
18.391	6	chr18:39104176-39104190	LOC545253	NM_001033789	6937	3'	Arhgap26	NM_175164	14934	5'
18.448	6	chr18:44803798-44803899	Mcc	AK158266	144217	Intronic	Mcc	AK158266	45946	Intronic
18.6324	6	chr18:63239503-63239530	AK018503	AK018503	39	Intronic	AK018503	AK018503	752	Intronic
18.6443	6	chr18:64435883-64436270	St8sia3	NM_009182	34563	3'	Onecut2	NM_194268	29655	5'
18.7473	6	chr18:74733653-74733701	Myo5b	NM_201600	27778	Intronic	Myo5b	NM_201600	8609	Intronic
18.8141	6	chr18:81407256-81407349	Sall3	NM_178280	258665	intergenic	Galr1	Y15004	1120281	intergenic
18.8308	6	chr18:83084000-83084128	AK156842	AK156842	328520	intergenic	Zfp516	NM_183033	5981	5'
19.2086	6	chr19:20863180-20863299	Tmc1	AK077146	501	Intronic	Tmc1	AK077146	2856	Intronic
19.3115	6	chr19:31148938-31148978	Prkg1	NM_011160	89799	Intronic	Cstf2t	NM_031249	41	5'
19.3859	6	chr19:38592840-38592881	Plce1	NM_019588	2264	1st intron	Plce1	NM_019588	92725	1st intron
19.4171	6	chr19:41713729-41714061	Slit1	NM_015748	7818	Intronic	Slit1	NM_015748	60454	Intronic
19.5894	6	chr19:5894332-5894382	Tigd3	NM_198634	250	5'	Dpf2	NM_011262	3018	3'
X.20077382	6	chrX:20078060-20078107	AF085809	AF085809	213	5'	Pfc	NM_008823	4409	3'
Y.1025548	6	chrY:1034519-1034528	Usp9y	NM_148943	238298	intergenic	Zfy2	NM_009571	356559	intergenic
Y.1519817	6	chrY:1525713-1525735	Zfy2	NM_009571	70446	5'	BC111527	BC111527	421615	intergenic
Y.1636172	6	chrY:1642468-1642513	Zfy2	NM_009571	187212	intergenic	BC111527	BC111527	304849	intergenic
Y.2572815	6	chrY:2575089-2575124	Rbmy1a1	U36929	112571	intergenic	N.A.	N.A.	N.A.	N.A.
Y.334778	6	chrY:339817-339887	Jarid1d	NM_011419	59598	3'	Eif2s3y	AK012186	7184	5'
Y.385652	6	chrY:386264-386318	Eif2s3y	NM_012011	21256	3'	Uty	AK162410	47011	3'
Y.511363	6	chrY:516622-516701	Uty	AF057367	3634	Intronic	Uty	AF057367	6554	Intronic
1.1016	7	chr1:101602554-101602646	AK014872	AK014872	1262814	intergenic	Cdh20	NM_011800	4993764	intergenic
1.11315	7	chr1:11315351-11315449	C030045D06Rik	NM_001033636	31311	3'	A830018L16Rik	AK081622	83917	5'
1.12008	7	chr1:120085187-120085300	Cdh7	AK042657	8117738	intergenic	Tsn	NM_011650	40821	3'
1.12057	7	chr1:120576240-120576408	Tcfcp2l1	AK143960	67571	3'	Inhbb	NM_008381	666685	intergenic
1.13549	7	chr1:135488410-135488505	Zc3h11a	AK144981	26	5'	Atp2b4	NM_213616	34609	3'
1.13745	7	chr1:137451348-137451369	Nav1	AK158038	27043	1st intron	Nav1	AK158038	52970	1st intron
1.16816	7	chr1:168156128-168156133	5330438I03Rik	NM_199365	9870	5'	Tada1l	NM_030245	59843	5'
1.16902	7	chr1:169024647-169024677	C030014K22Rik	NM_175461	96980	3'	Uck2	NM_030724	38099	3'
1.17914	7	chr1:179145332-179145514	Akt3	NM_011785	59981	5'	Zfp238	NM_001012330	135911	intergenic
1.36596	7	chr1:3660937-3661185	Xkr4	NM_001011874	0	1st exon	Xkr4	NM_001011874	0	1st exon
1.39595	7	chr1:39595388-39595513	Creg2	NM_170597	0	1st exon	Creg2	NM_170597	0	1st exon
1.4238	7	chr1:42381228-42381237	AK048997	AK048997	205578	intergenic	2610017I09Rik	NM_183252	211513	intergenic
1.75062	7	chr1:75063133-75063162	Abcb6	BC006634	0	1st exon	Abcb6	BC006634	0	1st exon
1.87328	7	chr1:87331660-87331725	5830484A20Rik	AK139759	2175628	intergenic	5830484A20Rik	NM_175397	76379	3'
1.93801	7	chr1:93801793-93801838	Hdac4	NM_207225	333	Intronic	Hdac4	NM_207225	1289	Intronic
2.12483	7	chr2:124827420-124827476	Myef2	AK048404	12381	5'	AK141570	AK141570	683	5'
2.12876	7	chr2:128762011-128762050	Ttl	NM_027192	1656	Intronic	Ttl	NM_027192	5265	Intronic
2.13005	7	chr2:130054159-130054214	Ebf4	AF387633	314	Intronic	Ebf4	AF387633	2713	Intronic
2.13575	7	chr2:135749524-135749533	6330527O06Rik	NM_029530	0	1st exon	6330527O06Rik	NM_029530	0	1st exon
2.14645	7	chr2:146453092-146453267	A230067G21Rik	NM_001033348	249734	intergenic	Gm114	NM_001033298	94149	5'
2.15202	7	chr2:152023871-152023878	AL033326	NM_019705	311	1st intron	AL033326	NM_019705	61	1st intron
2.15842	7	chr2:158419495-158419763	Ppp1r16b	NM_153089	31978	Intronic	Ppp1r16b	NM_153089	12546	Intronic
2.15868	7	chr2:158677431-158677437	Dhx35	NM_145742	127780	intergenic	Gm826	NM_001033411	1325406	intergenic
2.16538	7	chr2:165378932-165378945	Eya2	NM_010165	0	intragenic	Eya2	NM_010165	0	intragenic
2.17193	7	chr2:171932312-171932352	Cbln4	NM_175631	197661	intergenic	Mc3r	NM_008561	7363	5'
2.18122	7	chr2:181221792-181221924	Gmeb2	NM_198169	4485	5'	Stmn3	NM_009133	14006	3'
2.19346	7	chr2:19346973-19347013	Msrb2	NM_029619	34271	3'	Ptf1a	AK007922	16397	5'
2.22473	7	chr2:22473749-22473827	Myo3a	AK018511	272463	intergenic	Gad2	NM_008078	175	5'
2.28608	7	chr2:28609389-28609466	1190002A17Rik	NM_001033874	27335	Intronic	1190002A17Rik	NM_001033874	22240	Intronic
2.29626	7	chr2:29627119-29627193	Slc27a4	NM_011989	821	Intronic	Slc27a4	NM_011989	467	Intronic
2.30421	7	chr2:30423891-30424120	Cstad	NM_030137	6922	1st intron	Cstad	NM_030137	6162	1st intron
2.49324	7	chr2:49325637-49325797	Epc2	NM_172663	14860	Intronic	Epc2	NM_172663	9505	Intronic
2.5326	7	chr2:53262485-53262503	Arl6ip6	NM_022989	221459	intergenic	Rprm	NM_023396	636983	intergenic
2.79258	7	chr2:79261580-79261584	Neurod1	NM_010894	4107	5'	Ssfa2	AK169543	174680	intergenic
3.10543	7	chr3:105435789-105435924	AK016218	AK016218	228994	intergenic	Kcnd3	NM_001039347	144528	intergenic
3.15475	7	chr3:154755055-154755228	Tnni3k	NM_177066	26996	Intronic	Tnni3k	NM_177066	7631	Intronic
3.20302	7	chr3:20304228-20304338	Smarca3	NM_009210	2643	Intronic	Smarca3	NM_009210	1226	Intronic
3.3213	7	chr3:32132508-32132551	Kcnmb2	NM_028231	33140	Intronic	Kcnmb2	NM_028231	214394	Intronic
3.7616	7	chr3:76160443-76160547	Fstl5	AK140611	0	1st exon	Fstl5	AK140611	0	1st exon
3.84903	7	chr3:8491361-8491372	Il7	NM_008371	894866	intergenic	Stmn2	NM_025285	1232	5'
3.88676	7	chr3:88676269-88676371	Ssr2	NM_025448	1980	3'	Arhgef2	NM_008487	30743	5'
3.89983	7	chr3:89985759-89985760	Il6ra	AK082270	9359	1st intron	Il6ra	AK082270	13121	1st intron
3.94562	7	chr3:94563394-94563432	2310007A19Rik	AK009192	4418	5'	Tnrc4	BC057553	483	5'
4.11007	7	chr4:11007262-11007340	Plekhf2	NM_175175	72594	5'	Trp53inp1	AY034611	76285	5'
4.11538	7	chr4:115384949-115384982	Kino	NM_001039124	212	Intronic	Kino	NM_001039124	612	Intronic
4.11742	7	chr4:117424712-117424804	Artn	NM_009711	0	intragenic	Artn	NM_009711	0	intragenic
4.11987	7	chr4:119875428-119875624	Foxo6	NM_194060	90630	5'	Scmh1	NM_013883	27516	5'
4.12422	7	chr4:124217074-124217185	Fhl3	AF114382	6735	3'	BC092058	BC092058	2	5'
4.12475	7	chr4:124748757-124748837	Zc3h12a	NM_153159	118653	intergenic	Ftl1	BC106145	257619	intergenic
4.12483	7	chr4:124831237-124831373	Zc3h12a	NM_153159	201161	intergenic	Ftl1	BC106145	175111	intergenic
4.125	7	chr4:125004896-125004959	Zc3h12a	NM_153159	374783	intergenic	Ftl1	BC106145	1489	5'
4.1378	7	chr4:137796789-137796891	AY523601	AY523601	66621	3'	Ubxd3	NM_178671	193772	intergenic
4.13792	7	chr4:137919709-137919764	AY523601	AY523601	189517	intergenic	Ubxd3	NM_178671	70876	3'
4.14032	7	chr4:140318734-140318873	Crocc	NM_172122	30	Intronic	Crocc	NM_172122	43	Intronic
4.14072	7	chr4:14072716-14072791	Cbfa2t1h	AK032132	254041	intergenic	Slc26a7	NM_145947	359589	intergenic
4.142	7	chr4:142000717-142000730	9030409G11Rik	AK052809	489246	intergenic	Pdpn	BC026551	533393	intergenic
4.14627	7	chr4:146268442-146268487	1700029I01Rik	BC024323	244086	intergenic	AK054210	AK054210	115552	intergenic
4.14684	7	chr4:146845656-146845784	Nppa	NM_008725	0	intragenic	Nppa	NM_008725	0	intragenic
4.14833	7	chr4:148328975-148328985	Nmnat1	NM_133435	38	5'	Lzic	NM_026963	151	5'
4.14863	7	chr4:148632593-148632663	5730438N18Rik	BC011293	14586	5'	Spsb1	BC089357	107456	intergenic
4.151	7	chr4:151002294-151002386	Espn	NM_207687	6333	5'	Hes2	NM_008236	325	5'
4.1542	7	chr4:154203477-154203535	Prkcz	NM_008860	2104	1st intron	Prkcz	NM_008860	1444	1st intron
4.36071	7	chr4:36073800-36073816	Lrrn6c	NM_175516	39725	5'	Aco1	NM_007386	4258370	intergenic
4.47011	7	chr4:47011451-47011705	Tbc1d2	AK041359	340269	intergenic	Samd6	NM_001024136	25209	3'
4.90866	7	chr4:90866923-90867056	Elavl2	NM_010486	2916	5'	Elavl2	BC049125	24465	Intronic
5.10623	7	chr5:106233521-106233625	Zfp326	NM_018759	77459	3'	E130309B19Rik	NM_001005477	459252	intergenic
5.11214	7	chr5:112142156-112142206	E130006D01Rik	NM_207252	140175	intergenic	Cryba4	AK161601	344614	intergenic
5.11678	7	chr5:116779219-116779371	1500001A10Rik	BC056392	35760	1st intron	1500001A10Rik	BC056392	73036	1st intron
5.12665	7	chr5:126647972-126648023	Aacs	NM_030210	841133	intergenic	AK157823	AK157823	883031	intergenic
5.12694	7	chr5:126940989-126940996	Aacs	NM_030210	1134128	intergenic	AK157823	AK157823	590036	intergenic
5.13838	7	chr5:138385274-138385286	Zfp113	AK220556	2523	1st intron	Zfp113	AK220556	136	1st intron
5.14315	7	chr5:143152010-143152116	Fbxl18	NM_001033312	0	intragenic	Fbxl18	NM_001033312	0	intragenic
5.14521	7	chr5:14520953-14521096	AK032603	AK032603	258330	intergenic	MGC58177	NM_198666	395104	intergenic
5.14862	7	chr5:148619117-148619125	C130038G02Rik	AK002529	2045	Intronic	C130038G02Rik	AK002529	4532	Intronic
5.27366	7	chr5:27366336-27366357	Dpp6	BC085154	130271	1st intron	Dpp6	AK158964	13638	5'
5.31193	7	chr5:31194346-31194570	Emilin1	NM_133918	0	intragenic	Emilin1	NM_133918	0	intragenic
5.32091	7	chr5:32091884-32091901	Bre	NM_181282	29639	Intronic	Bre	NM_181282	5165	Intronic
5.33314	7	chr5:33314665-33314844	Depdc5	AK052458	6229	3'	Ywhah	NM_011738	20992	5'
5.38548	7	chr5:38548799-38548922	2810021O14Rik	NM_025480	119	1st intron	2810021O14Rik	NM_025480	1384	1st intron
5.38816	7	chr5:38820398-38820467	Wdr1	NM_011715	1058	Intronic	Wdr1	NM_011715	1299	Intronic
5.41995	7	chr5:41996089-41996095	Rab28	NM_027295	4310	1st intron	Rab28	NM_027295	59	1st intron
5.78182	7	chr5:78182436-78182450	AK076353	AK076353	2317	5'	Hod	NM_175606	7177	1st intron
5.89629	7	chr5:89628883-89628884	Igj	NM_152839	26521	5'	Crlz1	NM_023054	159	5'
6.11274	7	chr6:112742673-112742791	Rad18	AK030043	80285	5'	Thumpd3	AK017246	269358	intergenic
6.12043	7	chr6:120432779-120432852	Il17r	NM_008359	3730	1st intron	Il17r	NM_008359	4894	1st intron
6.12267	7	chr6:122672798-122672840	Dppa3	NM_139218	76929	3'	AK010332 (Nanog)	AK010332 (Nanog)	392	5'
6.12843	7	chr6:128435128-128435241	AK029950	AK029950	29869	Intronic	Ppih	NM_028677	3100	3'
6.14843	7	chr6:148435284-148435377	BC023818	NM_198967	33808	5'	LOC622319	NM_001037912	128624	intergenic
6.30983	7	chr6:30983288-30983511	Tsga13	NM_054073	137663	intergenic	AB041803	NM_144555	112287	intergenic
6.39177	7	chr6:39178985-39179014	A630082K20Rik	AK136238	42632	5'	Slc37a3	NM_028123	86592	3'
6.58259	7	chr6:58260503-58260512	V1rc25	AF394949	64270	3'	Abcg2	NM_011920	265741	intergenic
6.67593	7	chr6:67593460-67593490	Tacstd2	NM_020047	128101	intergenic	BC080787	BC080787	2943532	intergenic
6.70163	7	chr6:70166844-70166873	Tacstd2	NM_020047	2701484	intergenic	BC080787	BC080787	370149	intergenic
6.83527	7	chr6:83528742-83528781	Stambp	NM_024239	1062	Intronic	Stambp	NM_024239	718	Intronic
6.94103	7	chr6:94105782-94105818	Magi1	AK046635	89571	1st intron	Magi1	AK046635	142671	1st intron
7.11135	7	chr7:111350656-111350670	Galntl4	NM_173739	2953	Intronic	Galntl4	NM_173739	39473	Intronic
7.11301	7	chr7:113010779-113010864	Arntl	BC011080	11996	1st intron	Arntl	BC011080	14982	1st intron
7.11681	7	chr7:116813009-116813140	Nucb2	NM_016773	481371	intergenic	Rps15a	NM_170669	1082451	intergenic
7.11684	7	chr7:116841747-116841828	Nucb2	NM_016773	510084	intergenic	Rps15a	NM_170669	1053738	intergenic
7.11772	7	chr7:117717553-117717718	Nucb2	NM_016773	1385932	intergenic	Rps15a	NM_170669	177890	intergenic
7.11815	7	chr7:118150316-118150337	4930583K01Rik	NM_183267	113626	intergenic	Syt17	NM_138649	22677	3'
7.11871	7	chr7:118711358-118711552	2310008H09Rik	AF034580	64049	5'	Gprc5b	NM_022420	51740	3'
7.13823	7	chr7:138235324-138235391	Tcerg1l	NM_183289	1841	1st intron	Tcerg1l	NM_183289	305	1st intron
7.13901	7	chr7:139006892-139006964	Stk32c	NM_021302	14478	1st intron	Stk32c	NM_021302	32489	1st intron
7.15287	7	chr7:15287971-15288132	Kptn	NM_133727	2015	3'	Slc8a2	NM_148946	769	5'
7.1534	7	chr7:15342239-15342357	Mrg2	NM_008627	1308	Intronic	Mrg2	NM_008627	13	Intronic
7.1846	7	chr7:18463892-18463991	Fosb	NM_008036	117	Intronic	Fosb	NM_008036	1138	Intronic
7.18469	7	chr7:18470460-18470520	Fosb	NM_008036	2217	5'	Ercc1	NM_007948	33136	5'
7.18883	7	chr7:18885189-18885239	Pvrl2	BC009088	1823	Intronic	Pvrl2	BC009088	3344	Intronic
7.40505	7	chr7:4051646-4051697	Rdh13	NM_175372	2975	5'	Eps8l1	BC027043	12129	5'
7.43793	7	chr7:4380419-4380451	Il11	NM_008350	851	1st intron	Il11	NM_008350	630	1st intron
7.44312	7	chr7:44313145-44313165	Syt3	NM_016663	45084	3'	0610012D14Rik	NM_026690	20320	5'
7.60853	7	chr7:60853353-60853363	Snurf	NM_033174	969295	intergenic	AK013560	AK013560	220539	intergenic
7.64473	7	chr7:64474216-64474378	Apba2	NM_007461	41576	Intronic	Apba2	NM_007461	39682	Intronic
7.81963	7	chr7:81964086-81964174	Bnc1	NM_007562	98371	5'	Sh3gl3	BC027096	84177	5'
7.99522	7	chr7:99522934-99522953	AK141001	AK141001	19727	3'	Slco2b1	NM_175316	8942	3'
8.10923	7	chr8:109226908-109226971	AK138193	AK138193	37793	3'	AK136274	AK136274	67810	3'
8.12152	7	chr8:121528100-121528163	Cdh13	AK034995	136439	Intronic	Cdh13	AK034995	32862	Intronic
8.12184	7	chr8:121838011-121838013	Cdh13	AK034995	100164	Intronic	Cdh13	AK034995	16012	Intronic
8.12205	7	chr8:122050242-122050414	Cdh13	NM_019707	68988	Intronic	Cdh13	NM_019707	34502	Intronic
8.28693	7	chr8:28693929-28693953	Adrb3	NM_013462	0	intragenic	Adrb3	NM_013462	0	intragenic
8.30481	7	chr8:30483271-30483432	Unc5d	NM_153135	125905	1st intron	Unc5d	NM_153135	201825	1st intron
8.60378	7	chr8:60379910-60379931	Sap30	NM_021788	0	1st exon	Sap30	NM_021788	0	1st exon
8.66816	7	chr8:66817427-66817472	Spock3	AK049843	568405	intergenic	Tll1	NM_009390	89673	3'
8.73155	7	chr8:73157291-73157341	BC043070	BC043070	2854	Intronic	BC043070	BC043070	1199	Intronic
8.73282	7	chr8:73282366-73282416	Rent1	BC056442	129	5'	Comp	NM_016685	20154	5'
8.81334	7	chr8:81334431-81334470	Pou4f2	NM_138944	1726	5'	Rbmxrt	NM_009033	66891	3'
8.81471	7	chr8:81474300-81474330	2410193C02Rik	NM_001009980	47085	Intronic	2410193C02Rik	NM_001009980	474	Intronic
8.87901	7	chr8:87901539-87901596	Vmd2l1	BC036163	0	intragenic	Vmd2l1	NM_145388	0	intragenic
8.89049	7	chr8:89050688-89050689	Phkb	NM_199446	99942	3'	Abcc12	AK133175	321675	intergenic
8.96354	7	chr8:96358957-96358989	Ces1	NM_021456	132651	intergenic	AK007235	AK007235	14755	5'
8.97371	7	chr8:97371272-97371344	A630085K21	NM_177903	48013	5'	Cpne2	NM_153507	50847	5'
8.97682	7	chr8:9769223-9769302	Tmem28	AK149049	445579	intergenic	Tmem28	NM_173446	785	1st intron
8.97916	7	chr8:97917545-97917737	AK158130	AK158130	5000	3'	Gpr97	NM_173036	4844	Intronic
9.10237	7	chr9:102367909-102367964	Ky	NM_024291	2500	Intronic	Ky	NM_024291	1298	Intronic
9.10608	7	chr9:106082516-106082553	Tlr9	NM_031178	0	intragenic	Tlr9	NM_031178	0	intragenic
9.10675	7	chr9:106747232-106747415	Armet	NM_029103	0	intragenic	Armet	NM_029103	0	intragenic
9.10734	7	chr9:107345148-107345169	Cacna2d2	AK044603	21388	Intronic	Cacna2d2	AK044603	10401	Intronic
9.11924	7	chr9:119237832-119237836	Xylb	NM_001033209	368	Intronic	Xylb	NM_001033209	1292	Intronic
9.12186	7	chr9:121855509-121855524	C85492	NM_153540	10842	5'	Snrk	NM_133741	125082	intergenic
9.12252	7	chr9:122518639-122518830	Abhd5	NM_026179	288513	intergenic	D9Ertd402e	NM_001013405	135562	intergenic
9.18042	7	chr9:18042549-18042616	Mtnr1b	NM_145712	2417729	intergenic	Chordc1	NM_025844	85	5'
9.42402	7	chr9:42403846-42403888	Grik4	NM_175481	23734	Intronic	Grik4	NM_175481	2613	Intronic
9.44599	7	chr9:44599025-44599073	BC021608	NM_138951	45103	5'	Atp5l	NM_013795	65218	3'
9.47888	7	chr9:47889629-47889700	Igsf4a	NM_207675	285286	intergenic	D930028F11Rik	AK048132	24302	5'
9.5641	7	chr9:56410722-56410864	Hmg20a	NM_025812	115722	intergenic	Lrrn6a	NM_181074	5817	3'
9.64759	7	chr9:64758899-64758963	2010321M09Rik	AK041578	0	1st exon	2010321M09Rik	AK041578	0	1st exon
10.1057	7	chr10:105699778-105699837	Ccdc59	NM_025602	448189	intergenic	Ppfia2	NM_177373	174640	intergenic
10.1118	7	chr10:111827658-111827693	Kcnc2	NM_001025581	151161	Intronic	Kcnc2	NM_001025581	32041	Intronic
10.1281	7	chr10:128071822-128071823	Zfpn1a4	AK170453	23029	5'	Suox	BC027197	1020	3'
10.4414	7	chr10:44141509-44141543	Prdm1	NM_007548	2873	Intronic	Prdm1	NM_007548	3512	Intronic
10.4424	7	chr10:4424204-4424216	Rgs17	AK045770	0	1st exon	Rgs17	AK045770	0	1st exon
10.6181	7	chr10:61807275-61807314	Hkdc1	NM_145419	83	Intronic	Hkdc1	NM_145419	5836	Intronic
10.708	7	chr10:70799033-70799103	Ipmk	NM_027184	17885	3'	1700049L16Rik	NM_175390	576112	intergenic
10.8085	7	chr10:80856317-80856332	Nfic	Y07693	22057	5'	AK083461	AK083461	14310	3'
10.8487	7	chr10:84872002-84872048	Btbd11	NM_028709	53748	1st intron	Btbd11	NM_028709	104214	1st intron
11.1075	7	chr11:107502614-107502644	Helz	NM_198298	0	intragenic	Helz	NM_198298	0	intragenic
11.1196	7	chr11:119591300-119591373	4932417H02Rik	NM_028898	18832	Intronic	4932417H02Rik	NM_028898	5295	Intronic
11.1712	7	chr11:17118098-17118347	AI553587	NM_178909	6073	1st intron	AI553587	NM_178909	793	1st intron
11.2013	7	chr11:20132106-20132338	Cep68	NM_172260	1625	Intronic	Cep68	NM_172260	3785	Intronic
11.3094	7	chr11:3094042-3094146	BC046305	BC046305	680	5'	Eif4enif1	AK041598	8299	5'
11.3232	7	chr11:32320080-32320173	G431001E03Rik	NM_177364	2921	Intronic	G431001E03Rik	NM_177364	1895	Intronic
11.3262	7	chr11:32618501-32618661	Fbxw11	AK149139	6584	Intronic	Fbxw11	AK149139	1889	Intronic
11.4796	7	chr11:4796876-4796983	Fmip	NM_172438	1548	1st intron	Fmip	NM_172438	2863	1st intron
11.5148	7	chr11:51481365-51481412	0610039K22Rik	NM_025346	2069	5'	C330016O10Rik	NM_145974	5123	3'
11.5169	7	chr11:51687439-51687620	Phf15	NM_199299	8376	Intronic	Phf15	NM_199299	2498	Intronic
11.5273	7	chr11:52736999-52737017	Fstl4	AK046350	78927	Intronic	Fstl4	AK046350	106610	Intronic
11.5303	7	chr11:53030816-53031085	Fstl4	NM_177059	180	3'	Hspa4	AK220167	72285	3'
11.5454	7	chr11:54539509-54539530	Rapgef6	NM_175258	0	intragenic	Rapgef6	NM_175258	0	intragenic
11.7213	7	chr11:72127943-72127990	Fbxo39	NM_001037713	3003	3'	Tekt1	BC098181	32948	3'
11.732	7	chr11:73204656-73204670	AK133348	AK133348	32555	3'	Olfr1	NM_146921	6606	3'
11.7815	7	chr11:78149025-78149034	Pigs	NM_201406	3748	Intronic	Pigs	NM_201406	114	Intronic
11.8178	7	chr11:81783048-81783138	AK017430	AK017430	72316	3'	Accn1	NM_001034013	730	1st intron
11.8241	7	chr11:82413193-82413252	Gm644	NM_023438	150700	intergenic	AY512914	AY512914	36324	5'
11.9429	7	chr11:94290929-94291026	Cacna1g	BC057399	850	5'	Spata20	NM_144827	4015	3'
11.9508	7	chr11:95081615-95081647	Tac4	NM_053093	233	Intronic	Tac4	NM_053093	1826	Intronic
11.9814	7	chr11:98140199-98140229	Crkrs	NM_026952	77421	3'	Neurod2	BC058965	2419	3'
11.986	7	chr11:98602123-98602142	Nr1d1	NM_145434	11220	5'	4121402D02Rik	NM_028722	9472	5'
11.9901	7	chr11:99008865-99008888	Ccr7	NM_007719	37717	5'	Smarce1	NM_020618	16262	3'
12.1075	7	chr12:107457619-107457722	Vrk1	NM_011705	979210	intergenic	AK014062	AK014062	484274	intergenic
12.1134	7	chr12:113356065-113356329	Gpr132	NM_019925	47497	5'	Jag2	NM_010588	210	3'
12.2164	7	chr12:21640587-21640660	Ywhaq	BC085299	2334	Intronic	Ywhaq	BC085299	830	Intronic
12.3012	7	chr12:30116687-30116749	Myt1l	NM_008666	1816	1st intron	Myt1l	BC079651	4322	5'
12.3844	7	chr12:3846100-3846115	AK086254	AK086254	7293	3'	Dnmt3a	NM_007872	3526	1st intron
12.5499	7	chr12:54989567-54989626	AK147248	AK147248	919215	intergenic	AK162871	AK162871	2041	5'
12.5786	7	chr12:57858986-57859024	Slc25a21	NM_172577	12680	1st intron	Slc25a21	NM_172577	255878	1st intron
12.761	7	chr12:76095683-76095760	Kcnh5	NM_172805	0	1st exon	Kcnh5	NM_172805	0	1st exon
12.7675	7	chr12:76755459-76755511	AK052521	AK052521	18167	1st intron	AK052521	AK052521	17374	1st intron
12.8788	7	chr12:87879259-87879386	2310044G17Rik	BC026384	26416	3'	Tmem63c	NM_172583	36343	5'
13.1085	7	chr13:108539846-108539913	AK052571	AK052571	385821	intergenic	AK037945	AK037945	305300	intergenic
13.1102	7	chr13:110237202-110237208	Pde4d	AK035860	0	1st exon	Pde4d	AK035860	0	1st exon
13.1748	7	chr13:17480446-17480588	AF397014	AF397014	620	5'	2810021B07Rik	NM_025479	36	5'
13.4318	7	chr13:43182370-43182427	Tbc1d7	AK049036	0	1st exon	Tbc1d7	AK049036	0	1st exon
13.5141	7	chr13:51413531-51413571	4930519N16Rik	NM_029173	225867	intergenic	Edg3	NM_010101	7707	5'
13.7011	7	chr13:70114704-70114967	Nsun2	NM_145354	11806	3'	D13Wsu50e	NM_138596	162417	intergenic
13.7338	7	chr13:73385053-73385230	Irx2	BC085291	284557	intergenic	Irx4	NM_018885	341658	intergenic
13.7448	7	chr13:74475559-74475596	2900041A09Rik	NM_182839	66	1st intron	2900041A09Rik	NM_182839	11562	1st intron
13.7863	7	chr13:78634914-78635009	BC057380	BC057380	5181	3'	Nr2f1	NM_010151	17561	3'
13.8316	7	chr13:8316192-8316197	Adarb2	BC059822	113628	1st intron	Adarb2	BC059822	242154	1st intron
13.9824	7	chr13:98238554-98238659	5730427N09Rik	NM_021552	41	5'	Gfm2	AK044371	28	5'
14.1888	7	chr14:18884436-18884468	BC027644	BC027644	10663	5'	Kcnk5	NM_021542	46300	3'
14.2888	7	chr14:28878426-28878550	Cacna1d	AB086123	359	Intronic	Cacna1d	AB086123	753	Intronic
14.3673	7	chr14:36731962-36732035	Ghitm	NM_078478	684992	intergenic	Nrg3	NM_008734	550204	intergenic
14.3769	7	chr14:37686831-37686855	Nrg3	NM_008734	106673	Intronic	Nrg3	NM_008734	237003	Intronic
14.4626	7	chr14:46263668-46263825	C130032J12Rik	NM_178684	18780	3'	Lgals3	NM_010705	32047	5'
14.606	7	chr14:60602993-60603001	Kcnrg	NM_206974	36054	3'	Dleu7	NM_173419	627342	intergenic
14.6271	7	chr14:62712618-62712715	Mtmr9	NM_177594	214603	intergenic	Xkr6	NM_173393	36461	5'
14.6721	7	chr14:6725826-6725851	AK158007	AK158007	143854	intergenic	Dnase1l3	NM_007870	31230	3'
14.8546	7	chr14:85465750-85465769	Pcdh17	BC079850	2123543	intergenic	Diap3	AK220493	21348	3'
15.1022	7	chr15:102163408-102163565	Myg1	NM_021713	1091	Intronic	Myg1	NM_021713	1378	Intronic
15.6875	7	chr15:68749257-68749450	Rpl21	BC096572	609353	intergenic	Khdrbs3	NM_010158	8734	5'
15.7383	7	chr15:73831452-73831658	Gm628	NM_001033365	164629	intergenic	Bai1	NM_174991	512382	intergenic
15.7421	7	chr15:74210065-74210141	Gm628	NM_001033365	543177	intergenic	Bai1	NM_174991	133834	intergenic
15.7542	7	chr15:75416388-75416389	Ly6h	BC028758	22317	5'	Gpihbp1	NM_026730	7523	5'
15.7781	7	chr15:77810873-77810899	Eif3s7	NM_018749	12871	5'	Cacng2	NM_007583	11330	3'
15.7786	7	chr15:77857066-77857092	Cacng2	NM_007583	16428	1st intron	Cacng2	NM_007583	88855	1st intron
15.7867	7	chr15:78674451-78674473	Cdc42ep1	NM_027219	0	intragenic	Cdc42ep1	NM_027219	0	intragenic
15.8166	7	chr15:81660944-81661046	Tef	NM_017376	6879	3'	Tob2	NM_020507	15172	3'
15.8334	7	chr15:83340404-83340598	Ttll1	NM_178869	1858	5'	Bik	NM_007546	14135	5'
15.8511	7	chr15:8512401-8512445	Nipbl	AJ627033	120745	intergenic	Slc1a3	NM_148938	68916	3'
15.8608	7	chr15:86088250-86088385	Tbc1d22a	NM_145476	21258	Intronic	Tbc1d22a	NM_145476	31581	Intronic
15.8815	7	chr15:88153128-88153157	AW049604	NM_134096	566014	intergenic	Zdhhc25	NM_027306	274924	intergenic
15.9743	7	chr15:97436987-97437198	BC038822	NM_172293	223382	intergenic	D15Ertd682e	NM_028003	66045	3'
15.9792	7	chr15:97921542-97921573	Senp1	NM_144851	213	5'	Pfkm	NM_021514	18591	5'
16.1165	7	chr16:11652160-11652206	4933437K13Rik	NM_028964	172	Intronic	4933437K13Rik	NM_028964	16590	Intronic
16.3187	7	chr16:31868267-31868307	0610012G03Rik	BC021536	59	5'	Ncbp2	NM_026554	97	5'
16.3432	7	chr16:34320107-34320378	AK147314	AK147314	8386	1st intron	AK147314	AK147314	113417	1st intron
16.373	7	chr16:37304120-37304204	Polq	AY147863	289527	intergenic	Gtf2e1	NM_028812	124871	intergenic
16.6471	7	chr16:64713200-64713218	AK161311	AK161311	68	5'	Zfp654	NM_028059	9338	3'
16.7533	7	chr16:75330112-75330129	Robo2	AK048081	1035615	intergenic	D930038D03Rik	NM_177142	93102	3'
16.863	7	chr16:8633240-8633265	Carhsp1	NM_025821	45778	5'	AK163088	AK163088	132821	intergenic
16.9316	7	chr16:9316660-9316998	AK163088	AK163088	548356	intergenic	Grin2a	NM_008170	174434	intergenic
16.9466	7	chr16:94664318-94664346	Dscr3	NM_007834	29091	5'	Dyrk1a	NM_007890	55924	5'
16.9739	7	chr16:97391851-97391878	Dscam	NM_031174	116219	intergenic	AK148233	AK148233	68808	3'
17.2551	7	chr17:25511860-25512021	Haghl	AK047517	0	intragenic	Haghl	AK047517	0	intragenic
17.2719	7	chr17:27194411-27194438	Grm4	NM_001013385	12213	Intronic	Grm4	NM_001013385	6071	Intronic
17.3066	7	chr17:30665793-30665798	AK138161	AK138161	14927	Intronic	AK138161	AK138161	15287	Intronic
17.307	7	chr17:30705729-30705749	Umodl1	BC051427	4917	Intronic	Umodl1	BC051427	1618	Intronic
17.316	7	chr17:31598939-31599073	Snf1lk	NM_010831	14518	5'	AK016553	AK016553	74471	3'
17.3365	7	chr17:33647362-33647457	Rxrb	AK159671	0	intragenic	Rxrb	AK159671	0	intragenic
17.3488	7	chr17:34889441-34889593	H2-D1	AK159572	13969	3'	H2-Q1	BC080812	39081	5'
17.3652	7	chr17:36518041-36518116	Trim31	NM_146077	0	intragenic	Trim31	NM_146077	0	intragenic
17.4495	7	chr17:44951084-44951105	Spats1	NM_027649	12575	5'	Aarsl	NM_198608	19326	5'
17.4594	7	chr17:45943201-45943316	C330008L01Rik	NM_175351	35702	5'	BC048355	NM_207161	16729	5'
17.46	7	chr17:45998153-45998179	AK147675	AK147675	4821	Intronic	AK147675	AK147675	3246	Intronic
17.7146	7	chr17:71457937-71457964	AK077138	AK077138	952	1st intron	AK016064	AK016064	3145	Intronic
18.3159	7	chr18:31590166-31590174	Syt4	NM_009308	0	1st exon	Syt4	NM_009308	0	1st exon
18.3226	7	chr18:32263127-32263172	1700069O15Rik	BC068184	21695	3'	Proc	NM_008934	2986	3'
18.3601	7	chr18:36014550-36014559	Cxxc5	NM_133687	26893	3'	Psd2	BC066026	76248	5'
18.4977	7	chr18:49772686-49772722	LOC433182	BC089539	1598994	intergenic	AK144689	AK144689	49438	3'
18.5212	7	chr18:52120061-52120120	AK046456	AK046456	689781	intergenic	Ftmt	NM_026286	336813	intergenic
18.7054	7	chr18:70536507-70536596	AK009098	AK009098	166784	intergenic	4930503L19Rik	NM_172967	41956	3'
18.8911	7	chr18:89106090-89106149	Rttn	NM_175542	0	1st exon	Rttn	NM_175542	0	1st exon
19.4132	7	chr19:41319917-41319959	Smbp	NM_133352	2623	5'	Pik3ap1	NM_031376	5744	3'
19.4349	7	chr19:43495701-43495845	Cnnm1	NM_031396	445	1st intron	Cnnm1	NM_031396	22657	1st intron
19.4689	7	chr19:46887553-46887574	Cnnm2	NM_033569	70859	1st intron	Cnnm2	NM_033569	19647	1st intron
19.4822	7	chr19:48221800-48221808	BC063749	AK160686	249194	intergenic	Sorcs3	NM_025696	37530	5'
X.120303407	7	chrX:120310893-120311023	BC027572	BC027572	1050723	intergenic	4932411N23Rik	NM_177705	1969097	intergenic
X.71912776	7	chrX:71918964-71918977	Rab39b	NM_175122	88046	5'	Pls3	BC005459	119413	intergenic
X.96021895	7	chrX:96022392-96022417	Pja1	BC037616	349038	intergenic	Eda	NM_010099	155919	intergenic
Y.1651895	7	chrY:1655299-1655312	Zfy2	NM_009571	200027	intergenic	BC111527	BC111527	292034	intergenic
Y.1686430	7	chrY:1686567-1686641	Zfy2	NM_009571	231326	intergenic	BC111527	BC111527	260735	intergenic
Y.1771421	7	chrY:1777955-1778066	Zfy2	NM_009571	322732	intergenic	BC111527	BC111527	169329	intergenic
Y.528135	7	chrY:531376-531483	Uty	AF057367	5596	Intronic	Uty	AF057367	2218	Intronic
Y.62975	7	chrY:69157-69957	Zfy1	NM_009570	46	Intronic	Zfy1	NM_009570	1903	Intronic
Y.689765	7	chrY:696373-696428	Usp9y	NM_148943	3093	Intronic	Usp9y	NM_148943	4702	Intronic
Y.735815	7	chrY:739338-739544	Usp9y	NM_148943	7182	Intronic	Usp9y	NM_148943	9418	Intronic
1.11386	8	chr1:11386551-11386567	C030045D06Rik	NM_001033636	102470	intergenic	A830018L16Rik	AK081622	12758	5'
1.13295	8	chr1:132954138-132954230	Mapkapk2	NM_008551	29095	5'	Dyrk3	NM_145508	1802	3'
1.13437	8	chr1:134369093-134369224	Cntn2	BC066106	7795	1st intron	Cntn2	BC066106	1109	1st intron
1.13743	8	chr1:137432538-137432539	Nav1	AK158038	8223	1st intron	Nav1	AK158038	71790	1st intron
1.15315	8	chr1:153152369-153152407	1200016B10Rik	NM_025819	1402	Intronic	1200016B10Rik	BC055064	1264	Intronic
1.15735	8	chr1:157356528-157356540	Acbd6	AK165836	6522	3'	Acbd6	NM_028250	7136	Intronic
1.16598	8	chr1:165979503-165979570	Selp	M72332	0	intragenic	Selp	M72332	0	intragenic
1.19417	8	chr1:194173398-194173577	Kcnh1	NM_001038607	37844	Intronic	Hhat	BC008159	23947	3'
1.85058	8	chr1:85058709-85058878	5830484A20Rik	AK139759	870	1st intron	AK047983	AK047983	66575	3'
1.91608	8	chr1:91613105-91613222	Centg2	NM_178119	15528	Intronic	Centg2	NM_178119	7169	Intronic
1.93569	8	chr1:93573468-93573525	Asb1	NM_023046	183462	intergenic	Twist2	NM_007855	58385	5'
2.10208	8	chr2:102078943-102079042	AK165496	AK165496	141562	intergenic	Trim44	NM_020267	21965	3'
2.10948	8	chr2:109476959-109477055	Bdnf	NM_007540	829	1st intron	Bdnf	NM_007540	47212	1st intron
2.1137	8	chr2:113704885-113704937	Gja9	NM_010290	0	1st exon	Gja9	NM_010290	0	1st exon
2.12105	8	chr2:121049831-121049851	Hisppd2a	AK046696	3323	5'	Ckmt1	NM_009897	239	5'
2.12722	8	chr2:127223989-127223994	Prom2	BC039212	670	Intronic	Prom2	BC039212	185	Intronic
2.13978	8	chr2:139787604-139787619	Tasp1	AK146320	29384	5'	AK132230	AK132230	23711	3'
2.14323	8	chr2:143228027-143228079	Otor	NM_020595	454915	intergenic	Pcsk2	NM_008792	9565	5'
2.15735	8	chr2:157355219-157355219	Blcap	NM_016916	97417	5'	Ctnnbl1	AK145147	73672	5'
2.15807	8	chr2:158077573-158077648	A930034L06Rik	BC049241	4567	3'	BC054059	NM_145635	116441	intergenic
2.15826	8	chr2:158262030-158262093	BC054059	NM_145635	62422	3'	Slc32a1	BC052020	40145	5'
2.16325	8	chr2:163256297-163256324	Hnf4a	BC039220	560	Intronic	Hnf4a	BC039220	1250	Intronic
2.1636	8	chr2:163597934-163598000	Rims4	NM_183023	27294	1st intron	Rims4	NM_183023	12059	1st intron
2.17372	8	chr2:173719122-173719224	Vapb	NM_019806	291898	intergenic	Stx16	NM_172675	85	5'
2.17392	8	chr2:173922884-173922986	Npepl1	NM_213733	157296	intergenic	Gnas	NM_010310	4333	5'
2.17962	8	chr2:179627763-179627809	Cdh4	NM_009867	253567	Intronic	Cdh4	NM_009867	81874	Intronic
2.18068	8	chr2:180685480-180685547	AK006122	AK006122	13827	3'	Bhlhb4	NM_080641	18551	3'
2.18087	8	chr2:180867938-180868035	C030019F02Rik	NM_021426	1367	Intronic	C030019F02Rik	NM_021426	4450	Intronic
2.28272	8	chr2:28275469-28275556	Gm347	NM_001005420	0	intragenic	Gm347	NM_001005420	0	intragenic
2.28442	8	chr2:28443863-28443952	Gfi1b	NM_008114	0	1st exon	Gfi1b	NM_008114	0	1st exon
2.33886	8	chr2:33887261-33887325	2610528K11Rik	BC059907	177338	intergenic	Pbx3	AK144363	106464	intergenic
2.7036	8	chr2:70360529-70360566	4933404M02Rik	NM_025744	36336	3'	Gad1	AK054554	2453	5'
2.90965	8	chr2:90968233-90968413	Madd	AK122257	317	Intronic	Madd	AY263983	22	Intronic
3.10709	8	chr3:107090676-107090699	Cd53	NM_007651	172579	intergenic	AI504432	NM_173787	76871	5'
3.11489	8	chr3:114896174-114896218	Col11a1	NM_007729	683905	intergenic	Olfm3	NM_153458	169	5'
3.14174	8	chr3:141748773-141748818	Unc5c	AK164239	7455	Intronic	Unc5c	AK164239	5376	Intronic
3.1484	8	chr3:14840218-14840233	Car1	NM_009799	55159	5'	Car3	NM_007606	55	5'
3.1532	8	chr3:153204919-153205007	St6galnac3	NM_011372	60852	Intronic	St6galnac3	NM_011372	143883	Intronic
3.89855	8	chr3:89855741-89855828	4632404H12Rik	NM_028726	295	1st intron	4632404H12Rik	NM_028726	2643	1st intron
3.96397	8	chr3:96397886-96397986	Fcgr1	NM_010186	18562	5'	D730018G16	BC107365	121255	intergenic
4.10611	8	chr4:106115231-106115264	BC055111	NM_183182	77	5'	Ttc22	NM_177667	5132	5'
4.10657	8	chr4:106568918-106568924	2810410C14Rik	NM_175471	0	intragenic	2810410C14Rik	NM_175471	0	intragenic
4.1194	8	chr4:119401498-119401637	Guca2b	NM_008191	244690	intergenic	Edn2	BC037042	257272	intergenic
4.12038	8	chr4:120378556-120378594	Rims3	NM_182929	2855	1st intron	Rims3	NM_182929	2133	1st intron
4.12382	8	chr4:123819528-123819648	Rragc	BC071245	380295	intergenic	AK160260	AK160260	251903	intergenic
4.12502	8	chr4:125021361-125021443	Ftl1	BC106145	14100	3'	Csf3r	NM_007782	505636	intergenic
4.12505	8	chr4:125050696-125050737	Ftl1	BC106145	43414	3'	Csf3r	NM_007782	476322	intergenic
4.12538	8	chr4:125381184-125381196	Ftl1	BC106145	373888	intergenic	Csf3r	NM_007782	145848	intergenic
4.1255	8	chr4:125499068-125499145	Ftl1	BC106145	491804	intergenic	Csf3r	NM_007782	27932	5'
4.12754	8	chr4:127545112-127545163	Gjb5	NM_010291	684669	intergenic	Hmgb4	NM_027036	217378	intergenic
4.12841	8	chr4:128416236-128416310	Trim62	NM_178110	2643	3'	Adc	NM_172875	18175	3'
4.13232	8	chr4:132318593-132318599	Ahdc1	NM_146155	34233	Intronic	Ahdc1	NM_146155	8491	Intronic
4.13915	8	chr4:139157408-139157457	Pax7	NM_011039	52388	5'	Igsf21	NM_198610	141495	intergenic
4.14217	8	chr4:142170323-142170359	9030409G11Rik	AK052809	658864	intergenic	Pdpn	BC026551	363775	intergenic
4.14683	8	chr4:146829194-146829347	2510039O18Rik	NM_029841	38156	3'	Nppb	NM_008726	427	5'
4.15267	8	chr4:152667994-152668107	Gm833	NM_001033414	1123328	intergenic	BC049688	BC049688	132509	intergenic
4.1544	8	chr4:154399383-154399566	Gnb1	NM_008142	443	Intronic	Gnb1	NM_008142	1495	Intronic
4.22735	8	chr4:22736645-22736719	Pou3f2	X66602	157549	intergenic	F730047E07Rik	BC094429	1851836	intergenic
4.43052	8	chr4:43052631-43052633	Stoml2	NM_023231	148	5'	B230312A22Rik	BC044832	882	3'
4.45859	8	chr4:45865499-45865594	Igfbpl1	NM_018741	17631	5'	1300002K09Rik	NM_028788	4512	5'
4.49863	8	chr4:49865133-49865214	AK162603	AK162603	36214	1st intron	AK162603	AK162603	308	1st intron
4.65883	8	chr4:65885569-65885636	Astn2	NM_207109	132861	1st intron	Astn2	NM_207109	4640	1st intron
5.11382	8	chr5:113826626-113826644	C530024P05Rik	NM_177292	11243	3'	Cmklr1	U79525	47696	3'
5.1205	8	chr5:120497909-120497958	Rbm19	NM_028762	38345	3'	Lhx5	NM_008499	194583	intergenic
5.12127	8	chr5:121270191-121270263	Rph3a	NM_011286	92	5'	Ptpn11	BC003980	120930	intergenic
5.12343	8	chr5:123432110-123432157	AK016534	AK016534	29977	3'	Hpd	NM_008277	292	3'
5.12378	8	chr5:123785135-123785203	Diablo	NM_023232	387	5'	Vps33a	NM_029929	4550	3'
5.13598	8	chr5:135981375-135981433	Por	NM_008898	7525	1st intron	Por	NM_008898	19093	1st intron
5.13613	8	chr5:136128196-136128268	2900083I11Rik	NM_021403	1639	3'	2900083I11Rik	BC051947	8576	Intronic
5.13742	8	chr5:137419802-137419803	BC058768	BC058768	0	intragenic	BC058768	BC058768	0	intragenic
5.14479	8	chr5:144796262-144796327	Bri3	AK049027	96010	3'	Nptx2	NM_016789	3133	5'
5.2817	8	chr5:28172502-28172546	Paxip1	NM_018878	50398	5'	Htr5a	NM_008314	208	5'
5.34586	8	chr5:34587299-34587340	Zfyve28	NM_001015039	27149	1st intron	Zfyve28	NM_001015039	17635	1st intron
5.35615	8	chr5:35616694-35616808	Adra2c	NM_007418	18009	3'	E130018O15Rik	NM_001002765	79260	3'
5.37301	8	chr5:37303941-37304064	Wfs1	AK144561	26820	5'	Gababrbp	NM_178394	35161	5'
5.37599	8	chr5:37601714-37601747	Evc	BC021392	0	intragenic	Evc	NM_021292	0	intragenic
5.38274	8	chr5:38277153-38277174	Msx1	BC016426	164346	intergenic	Stx18	AK007700	50317	5'
5.45815	8	chr5:45818139-45818179	9630031F12Rik	NM_021416	0	intragenic	9630031F12Rik	NM_021416	0	intragenic
5.52696	8	chr5:52700092-52700233	LOC433886	NM_001007590	36273	5'	Lgi2	AK122570	121603	intergenic
5.73926	8	chr5:73926868-73926914	Sgcb	NM_011890	12	5'	Usp46	NM_177561	354843	intergenic
5.78361	8	chr5:78362911-78362927	Rest	NM_011263	5160	3'	2610024G14Rik	NM_019836	6107	3'
5.99945	8	chr5:99947735-99947759	AK015871	AK015871	22411	3'	Hnrpd	BC011172	253560	intergenic
6.11409	8	chr6:114091289-114091404	Atp2b2	NM_009723	83725	5'	Slc6a11	NM_172890	5488	5'
6.11572	8	chr6:115725053-115725092	Tmem40	NM_144805	492	5'	Cand2	NM_025958	15120	5'
6.31204	8	chr6:31204612-31204654	AB041803	NM_144555	56037	5'	Mkln1	AK164822	124361	intergenic
6.32211	8	chr6:32210983-32211062	Plxna4	NM_175750	29690	Intronic	Plxna4	NM_175750	29600	Intronic
6.36306	8	chr6:36308302-36308314	9330158H04Rik	NM_001033377	103687	Intronic	9330158H04Rik	NM_001033377	4820	Intronic
6.38309	8	chr6:38311026-38311042	Zc3hav1	NM_028864	26823	5'	9430097H08Rik	NM_153600	96	5'
6.80913	8	chr6:8091968-8092021	Rnps1	AK146443	158556	intergenic	BC020002	NM_145374	67233	5'
6.83893	8	chr6:83893303-83893320	Zfml	NM_008717	13164	1st intron	Zfml	NM_008717	998	1st intron
6.89066	8	chr6:8907646-8907732	Nxph1	AK139424	5259	3'	Nxph1	NM_008751	289394	1st intron
6.91439	8	chr6:91439682-91439690	Tmem43	NM_028766	284	1st intron	Tmem43	NM_028766	3061	1st intron
6.91737	8	chr6:91739681-91739713	Grip2	NM_001033353	10995	5'	C130022K22Rik	BC051147	103864	intergenic
6.94405	8	chr6:94407994-94408004	Magi1	AK147358	158619	intergenic	Slc25a26	NM_026255	57810	5'
6.95188	8	chr6:95189136-95189170	Kbtbd8	NM_001008785	93973	3'	Suclg2	BC080781	250454	intergenic
7.10718	8	chr7:107184137-107184184	Syt9	NM_021889	21836	1st intron	Syt9	NM_021889	32062	1st intron
7.10887	8	chr7:108873635-108873655	Ric3	NM_178780	24459	1st intron	Ric3	NM_178780	693	1st intron
7.12095	8	chr7:120957078-120957132	Otoa	NM_139310	2868	3'	AK122466	AK122466	476063	intergenic
7.12118	8	chr7:121182553-121182698	Otoa	NM_139310	228388	intergenic	AK122466	AK122466	250543	intergenic
7.12329	8	chr7:123294692-123294708	AK080486	AK080486	2926	5'	AK086648	AK086648	840998	intergenic
7.13901	8	chr7:139011682-139011739	Stk32c	NM_021302	19260	1st intron	Stk32c	NM_021302	27707	1st intron
7.1441	8	chr7:144104098-144104352	Dhcr7	NM_007856	446426	intergenic	Cttn	NM_007803	140887	intergenic
7.18305	8	chr7:18306194-18306240	Qpctl	NM_026111	544	Intronic	Qpctl	NM_026111	679	Intronic
7.18441	8	chr7:18441652-18441706	Rtn2	NM_013648	292	1st intron	Rtn2	NM_013648	3376	1st intron
7.2914	8	chr7:29140352-29140388	AK172968	AK172968	30461	Intronic	AK172968	AK172968	3137	Intronic
7.30193	8	chr7:30193196-30193243	Nphs1	AF191090	1879	Intronic	Nphs1	AF191090	2124	Intronic
7.37483	8	chr7:37484288-37484437	Zfp536	NM_172385	5850	5'	C80913	NM_011274	184398	intergenic
7.43349	8	chr7:43351319-43351357	Etfb	NM_026695	25636	3'	4931406B18Rik	NM_028737	8624	3'
7.45233	8	chr7:45234135-45234204	2410127E16Rik	NM_029741	4308	1st intron	2410127E16Rik	NM_029741	530	1st intron
7.45986	8	chr7:4599713-4599780	Zfp579	NM_026741	1319	5'	Fiz1	NM_011813	10399	3'
7.51488	8	chr7:51489817-51489902	Tmem16e	NM_177694	23133	3'	Slc17a6	NM_080853	225	5'
7.825	8	chr7:82501747-82501764	Sh3gl3	AK012114	318157	intergenic	1700129I04Rik	NM_177894	7388	3'
7.97479	8	chr7:97481140-97481195	AK134242	AK134242	23004	3'	BC085127	BC085127	10866	1st intron
7.98313	8	chr7:98315322-98315362	Lrrc54	NM_001024619	78862	5'	LOC434214	NM_001034890	31381	5'
7.99506	8	chr7:99506795-99507032	AK141001	AK141001	3697	3'	Slco2b1	NM_175316	24972	3'
8.10256	8	chr8:10255890-10255951	C230040D10Rik	NM_001013383	101702	1st intron	C230040D10Rik	NM_001013383	16584	1st intron
8.12383	8	chr8:12384007-12384035	A230072I06Rik	NM_001033796	103392	intergenic	LOC434280	NM_001013812	1720	5'
8.12447	8	chr8:124469887-124469938	Fbxo31	NM_133765	5069	5'	Map1lc3b	NM_026160	6614	5'
8.12454	8	chr8:124539856-124539880	Zcchc14	NM_080855	1845	5'	Jph3	NM_020605	76783	5'
8.12929	8	chr8:129290807-129290869	Slc35f3	NM_175434	9266	3'	1810063B05Rik	NM_174987	17778	5'
8.17115	8	chr8:17115761-17115843	Csmd1	NM_053171	88488	Intronic	Csmd1	NM_053171	100780	Intronic
8.2031	8	chr8:20311890-20311917	A430108E01Rik	AK166663	73	5'	LOC436177	NM_001024708	94612	Intronic
8.20439	8	chr8:20439085-20439139	A430108E01Rik	AK166663	13	5'	2010016B13Rik	NM_183253	2081182	intergenic
8.30226	8	chr8:30226503-30226559	Unc5d	NM_153135	1473	Intronic	Unc5d	NM_153135	128	Intronic
8.67551	8	chr8:67553787-67553841	Cpe	NM_013494	42075	1st intron	Cpe	NM_013494	31019	1st intron
8.967	8	chr8:96702582-96702657	Gnao1	M36778	1797	Intronic	Gnao1	M36778	82739	Intronic
9.10392	8	chr9:103921668-103921678	Ube1dc1	NM_025692	209	5'	Acad11	NM_175324	373	5'
9.10845	8	chr9:108448016-108448044	4933406E20Rik	AK016685	5999	Intronic	4933406E20Rik	AK016685	6204	Intronic
9.1135	8	chr9:113502462-113502551	Arpp21	AK029467	1422776	intergenic	Pdcd6ip	BC026823	662	3'
9.1145	8	chr9:114502101-114502153	Cnot10	AK161842	13245	5'	Dync1li1	NM_146229	35400	5'
9.11951	8	chr9:119513102-119513226	Scn10a	NM_009134	3050	Intronic	Scn10a	NM_009134	313	Intronic
9.12078	8	chr9:120781633-120781666	Rpl14	NM_025974	358299	intergenic	Ctnnb1	NM_007614	522	5'
9.29615	8	chr9:29616713-29616740	Hnt	BC023307	455527	intergenic	Hnt	AK140516	95563	1st intron
9.41383	8	chr9:4139007-4139029	AK147527	AK147527	233236	intergenic	Aasdhppt	NM_026276	156074	intergenic
9.43709	8	chr9:43710738-43710758	Pvrl1	NM_021424	152299	intergenic	AK138823	AK138823	19209	3'
9.48649	8	chr9:48650526-48650604	Zbtb16	NM_001033324	62701	5'	Htr3a	X72395	579	3'
9.56929	8	chr9:56929011-56929043	Man2c1	NM_028636	1	1st intron	Man2c1	NM_028636	267	1st intron
9.58197	8	chr9:58198035-58198055	BC100468	BC100468	29473	5'	6030419C18Rik	NM_176921	88693	5'
9.5867	8	chr9:58671083-58671289	AK010725	AK010725	131493	intergenic	Neo1	AK052439	1631	3'
9.99373	8	chr9:99373343-99373347	Armc8	BC038866	12374	1st intron	Armc8	BC038866	4607	1st intron
10.1265	8	chr10:126458021-126458042	Cyp27b1	NM_010009	2077	3'	March9	NM_001033262	966	3'
10.1278	8	chr10:127811977-127812153	2610036N15Rik	NM_027257	280	Intronic	2610036N15Rik	NM_027257	129	Intronic
10.6042	8	chr10:60418806-60418958	AK007277	AK007277	85393	5'	Pcbd1	NM_025273	65834	5'
10.902	8	chr10:90201349-90201382	E030041M21Rik	NM_029166	953166	intergenic	Apaf1	AK220340	217750	intergenic
11.1009	8	chr11:100935927-100935984	1300010M03Rik	NM_028933	22	5'	Tubg1	NM_134024	264	5'
11.103	8	chr11:103026643-103026649	4933400C05Rik	NM_177801	685	Intronic	4933400C05Rik	NM_177801	180	Intronic
11.1184	8	chr11:118361959-118362019	D11Bwg0517e	BC054403	32495	Intronic	D11Bwg0517e	BC054403	64258	Intronic
11.1184	8	chr11:118419387-118419420	D11Bwg0517e	BC054403	89909	Intronic	D11Bwg0517e	BC054403	6844	Intronic
11.1533	8	chr11:15325609-15325629	Cobl	AK147366	2960660	intergenic	BC027127	NM_145967	832154	intergenic
11.3079	8	chr11:3081592-3081608	BC046305	BC046305	2090	Intronic	BC046305	BC046305	4466	Intronic
11.3435	8	chr11:34348104-34348129	Dock2	AK037611	9746	Intronic	Dock2	AK037611	16695	Intronic
11.4044	8	chr11:40443967-40444101	Odz2	NM_011856	3435936	intergenic	Mat2b	AK162087	78701	3'
11.5073	8	chr11:50736101-50736137	Zfp454	AK046117	5195	5'	Zfp2	BC089506	6016	3'
11.5574	8	chr11:55741099-55741190	Glra1	AK078258	289523	intergenic	Nmur2	NM_153079	127267	intergenic
11.6027	8	chr11:60270679-60270774	4933439F18Rik	NM_025757	9254	3'	Drg2	NM_021354	84	5'
11.6377	8	chr11:63769273-63769284	Hs3st3b1	NM_018805	30799	5'	Cox10	NM_178379	10800	3'
11.6937	8	chr11:69373767-69373818	Efnb3	NM_007911	105	1st intron	Efnb3	NM_007911	2093	1st intron
11.7855	8	chr11:78547271-78547295	Nlk	NM_008702	33715	5'	1810009O10Rik	NM_197989	19417	3'
11.7941	8	chr11:79409865-79409925	Rab11fip4	NM_175543	2266	1st intron	Rab11fip4	NM_175543	25927	1st intron
11.8013	8	chr11:80128873-80128978	Rhbdl4	NM_139228	10043	Intronic	Rhbdl4	NM_139228	6826	Intronic
11.8474	8	chr11:84745969-84746004	Znhit3	NM_001005223	13435	5'	Car4	BC012704	28047	5'
11.8774	8	chr11:87737223-87737358	Epx	NM_007946	45564	5'	Dynll2	NM_026556	58436	3'
11.9291	8	chr11:92913474-92913499	BC100484	BC100484	1519865	intergenic	Car10	AK012302	1010	5'
11.9735	8	chr11:97350200-97350270	P140	NM_018873	301	Intronic	P140	NM_018873	284	Intronic
12.1028	8	chr12:102799803-102799864	Lgmn	NM_011175	400	Intronic	Lgmn	NM_011175	1120	Intronic
12.1092	8	chr12:109233469-109233553	Degs2	AK162979	83407	5'	Yy1	NM_009537	7605	5'
12.1121	8	chr12:112127026-112127133	6720458F09Rik	NM_177374	309	1st intron	6720458F09Rik	NM_177374	1529	1st intron
12.1136	8	chr12:113587865-113587885	Mta1	NM_054081	2894	3'	Crip2	NM_024223	478	5'
12.2947	8	chr12:29475624-29475669	Tssc1	NM_201357	21973	3'	Myt1l	NM_008666	639024	intergenic
12.8513	8	chr12:85125937-85125980	AK134097	AK134097	48404	5'	Zadh1	NM_029880	49102	5'
12.9244	8	chr12:92446222-92446241	Sel1h	NM_001039089	191517	intergenic	Flrt2	NM_201518	3641852	intergenic
13.2528	8	chr13:25276630-25276744	Vmp	NM_009513	1132	1st intron	Vmp	NM_009513	618	1st intron
13.4695	8	chr13:46946194-46946203	Kif13a	AB037923	5508	5'	Nhlrc1	NM_175340	77330	3'
13.5427	8	chr13:54269929-54270091	Hrh2	NM_001010973	37959	3'	Cplx2	NM_009946	110962	intergenic
13.7001	8	chr13:70012565-70012668	A530095I07Rik	NM_207226	1221	5'	Srd5a1	NM_175283	28204	3'
13.9963	8	chr13:99634411-99634456	Foxd1	NM_008242	177584	intergenic	0610009B10Rik	NM_026685	100709	intergenic
14.1024	8	chr14:102422115-102422250	Scel	NM_022886	3154	Intronic	Scel	NM_022886	457	Intronic
14.1233	8	chr14:123330674-123330726	Fgf14	NM_010201	2618	5'	N.A.	N.A.	N.A.	N.A.
14.337	8	chr14:33696504-33696582	Grid1	NM_008166	44743	Intronic	Grid1	NM_008166	78300	Intronic
14.3378	8	chr14:33777576-33777620	Grid1	NM_008166	2469	Intronic	Grid1	NM_008166	78237	Intronic
14.3593	8	chr14:35927317-35927366	Gcap14	NM_027045	47336	5'	Rgr	NM_021340	21388	3'
14.5406	8	chr14:54063897-54063978	Jph4	NM_177049	48	Intronic	Jph4	NM_177049	209	Intronic
14.694	8	chr14:69403897-69403911	Xpo7	BC029702	66	Intronic	Xpo7	BC029702	491	Intronic
14.7589	8	chr14:75891435-75891472	D230005D02Rik	NM_172813	256	1st intron	D230005D02Rik	NM_172813	111507	1st intron
15.1017	8	chr15:101707955-101708030	4732484G22Rik	NM_001003667	10340	5'	2310001L23Rik	NM_001033177	4391	3'
15.1098	8	chr15:10982584-10982657	Rln3r1	NM_178717	0	1st exon	Rln3r1	NM_178717	0	1st exon
15.7203	8	chr15:72029989-72030115	A830008O07	NM_177819	472545	intergenic	1810044A24Rik	BC070463	386823	intergenic
15.7448	8	chr15:74486233-74486356	AK006048	AK006048	22778	5'	Arc	NM_018790	10043	3'
15.7451	8	chr15:74513001-74513126	Arc	NM_018790	13238	5'	Jrk	NM_008415	16602	3'
15.8381	8	chr15:83810353-83810415	4931407K02Rik	BC065111	9254	Intronic	4931407K02Rik	BC065111	824	Intronic
15.839	8	chr15:83898227-83898271	4931407K02Rik	BC065111	5134	5'	Sult4a1	NM_013873	5612	3'
15.8464	8	chr15:84641265-84641423	AK042863	AK042863	5420	Intronic	AK042863	AK042863	41159	Intronic
15.995	8	chr15:99497153-99497173	Racgap1	NM_012025	17508	5'	Accn2	NM_009597	1587	5'
16.2045	8	chr16:20451643-20451854	Ap2m1	NM_009679	471	Intronic	Ap2m1	NM_009679	1101	Intronic
16.3051	8	chr16:30507568-30507675	Lsg1	NM_178069	285	5'	BC022623	NM_177632	11847	5'
16.4367	8	chr16:43673250-43673281	Zbtb20	AK038731	129978	intergenic	Qtrtd1	BC083089	107480	intergenic
16.4619	8	chr16:4621208-4621226	Dnaja3	NM_023646	29	Intronic	Dnaja3	BC027240	577	Intronic
16.909	8	chr16:90900378-90900419	1110004E09Rik	BC019533	76726	5'	BC027145	BC027145	3236	3'
16.9682	8	chr16:96817029-96817164	Dscam	NM_031174	2908	Intronic	Dscam	NM_031174	3151	Intronic
17.1672	8	chr17:16722944-16722966	Rgmb	NM_178615	1191679	intergenic	BC018101	NM_001005358	45774	5'
17.2574	8	chr17:25739748-25739869	AB093257	AB093257	77	Intronic	AB093257	AB093257	1564	Intronic
17.2718	8	chr17:27177190-27177313	Grm4	NM_001013385	10800	Intronic	Grm4	NM_001013385	461	Intronic
17.2745	8	chr17:27452078-27452092	Spdef	NM_013891	4100	1st intron	Spdef	NM_013891	4055	1st intron
17.3007	8	chr17:30071260-30071366	Btbd9	NM_172618	9969	Intronic	Btbd9	AK006275	70227	1st intron
17.3241	8	chr17:32413528-32413557	Cyp4f16	NM_024442	126565	intergenic	Cyp4f15	NM_134127	11425	5'
17.8528	8	chr17:85280625-85280691	AK007130	AK007130	169311	intergenic	AK155246	AK155246	19239	Intronic
18.3641	8	chr18:36410646-36410764	Pura	NM_008989	3182	1st intron	Pura	NM_008989	2299	1st intron
18.3669	8	chr18:36685599-36685776	Slc4a9	AK142545	3441	3'	BC091647	BC091647	83325	5'
18.6145	8	chr18:61453483-61453629	Ppargc1b	AK028464	4879	Intronic	Ppargc1b	AK028464	54256	Intronic
18.6186	8	chr18:61862560-61862653	AI173486	NM_178928	290	Intronic	AI173486	NM_178928	257	Intronic
18.7748	8	chr18:77478836-77478854	St8sia5	NM_153124	19077	3'	AK030047	AK030047	33353	5'
18.8178	8	chr18:81780184-81780238	Sall3	NM_178280	631574	intergenic	Galr1	Y15004	747372	intergenic
19.4124	8	chr19:41245218-41245288	Tll2	NM_011904	8631	1st intron	Tll2	NM_011904	14533	1st intron
19.7207	8	chr19:7209200-7209461	Flrt1	NM_201411	36613	5'	D930010J01Rik	AK052998	43288	Intronic
X.100411304	8	chrX:100411547-100411641	Rnf12	NM_011276	227591	intergenic	AK152535	AK152535	74743	3'
Y.1041800	8	chrY:1048484-1048748	Usp9y	NM_148943	252391	intergenic	Zfy2	NM_009571	342466	intergenic
Y.1125735	8	chrY:1130473-1130517	Usp9y	NM_148943	334270	intergenic	Zfy2	NM_009571	260587	intergenic
Y.233442	8	chrY:242729-242780	Jarid1d	AK141096	5698	Intronic	Jarid1d	AK141096	4135	Intronic
Y.2678948	8	chrY:2682621-2682712	Rbmy1a1	U36929	220131	intergenic	N.A.	N.A.	N.A.	N.A.
Y.29633	8	chrY:33426-33428	No annotation yet				Zfy1	NM_009570	28223	3'
Y.878546	8	chrY:882717-883764	Usp9y	NM_148943	87015	5'	Zfy2	NM_009571	507842	intergenic
Y.976266	8	chrY:980092-980247	Usp9y	NM_148943	183944	intergenic	Zfy2	NM_009571	410913	intergenic
1.11751	9	chr1:117512263-117512303	Cdh7	AK042657	5544778	intergenic	Tsn	NM_011650	2613781	intergenic
1.12216	9	chr1:122159547-122159576	Steap3	AY214462	58827	5'	C1ql2	NM_207233	8565	5'
1.12222	9	chr1:122218056-122218122	C1ql2	NM_207233	47370	3'	Marco	NM_010766	83994	3'
1.12974	9	chr1:12975669-12975856	Slco5a1	AK028758	0	intragenic	Slco5a1	NM_172841	0	1st exon
1.19094	9	chr1:19095041-19095137	Tcfap2d	NM_153154	1565	Intronic	Tcfap2d	NM_153154	8953	Intronic
1.19416	9	chr1:194158450-194158512	Kcnh1	NM_001038607	22838	Intronic	Hhat	BC008159	38953	3'
1.34523	9	chr1:34524209-34524296	Tesp2	AK132909	18763	5'	9430069J07Rik	NM_213727	19	5'
1.36839	9	chr1:36840208-36840208	Zap70	BC029727	112844	intergenic	AK089564	AK089564	27133	3'
1.47971	9	chr1:4798185-4798246	Lypla1	NM_008866	152	1st intron	Lypla1	NM_008866	319	1st intron
2.14377	9	chr2:143768256-143768286	4930517K23Rik	NM_207275	2853	3'	LOC433481	NM_001033778	96318	3'
2.1514	9	chr2:151404267-151404295	Snph	NM_198214	80307	5'	Psmf1	NM_212446	3220	3'
2.15177	9	chr2:151773394-151773420	2310046K01Rik	NM_027172	72710	3'	Srxn1	BC049957	23556	5'
2.16226	9	chr2:162260329-162260419	Ptprt	AY026862	205907	1st intron	Ptprt	AY026862	91865	1st intron
2.16467	9	chr2:164671116-164671154	Slc12a5	NM_020333	410	Intronic	Slc12a5	NM_020333	223	Intronic
2.16515	9	chr2:165148172-165148304	Slc13a3	NM_054055	8246	1st intron	Slc13a3	NM_054055	16016	1st intron
2.17821	9	chr2:178206799-178206847	Phactr3	NM_028806	7916	Intronic	Phactr3	NM_028806	1480	Intronic
2.18105	9	chr2:181055531-181055630	Kcnq2	NM_001006669	11443	1st intron	Kcnq2	NM_001006669	8623	1st intron
2.18106	9	chr2:181066489-181066597	Kcnq2	NM_001006668	1910	5'	Eef1a2	NM_007906	10556	3'
2.26785	9	chr2:26786394-26786410	Rexo4	NM_207234	7	5'	Adamts13	AB071302	9021	5'
2.27569	9	chr2:27569643-27569659	Rxra	NM_011305	5699	Intronic	Rxra	NM_011305	968	Intronic
2.29132	9	chr2:29132177-29132240	Als4	NM_198033	127728	intergenic	Crsp8	BC016537	36618	5'
2.34769	9	chr2:34770793-34770799	Traf1	NM_009421	236	Intronic	Traf1	NM_009421	250	Intronic
2.58382	9	chr2:58382173-58382206	Acvr1	AK052246	50531	5'	Upp2	AK044005	582	5'
2.9145	9	chr2:91450789-91450854	AK132515	AK132515	191	5'	Arhgap1	AK046291	134	5'
2.92471	9	chr2:92472641-92472785	Chst1	NM_023850	56624	3'	Syt13	NM_030725	243225	intergenic
2.94324	9	chr2:94325590-94325613	Api5	AK134480	86642	5'	Lrrc4c	NM_178725	2942893	intergenic
3.10492	9	chr3:104924985-104925118	Mov10	NM_008619	0	intragenic	Mov10	NM_008619	0	intragenic
3.1054	9	chr3:105403422-105403488	AK016218	AK016218	196593	intergenic	Kcnd3	NM_001039347	176929	intergenic
3.10764	9	chr3:107640325-107640405	Slc6a17	NM_172271	11569	1st intron	Slc6a17	NM_172271	5295	1st intron
3.27558	9	chr3:27561556-27561683	Tnfsf10	NM_009425	30882	3'	Ghsr	NM_177330	803	5'
3.51572	9	chr3:51572048-51572097	Rab33b	BC065076	0	1st exon	Rab33b	BC065076	0	1st exon
3.80887	9	chr3:80888945-80889001	Gria2	NM_013540	255	5'	Glrb	NM_010298	40556	3'
4.10307	9	chr4:103070103-103070139	Oma1	NM_025909	205761	intergenic	BC051993	BC051993	47474	5'
4.11739	9	chr4:117391458-117391484	Dph2	NM_026344	1536	5'	Ipo13	NM_146152	952	3'
4.11779	9	chr4:117793775-117793875	Ptprf	NM_011213	18447	5'	BC059842	BC059842	66850	3'
4.1396	9	chr4:139598963-139598976	AK030056	AK030056	3591	5'	Arhgef10l	NM_172415	187590	intergenic
4.14002	9	chr4:140022521-140022528	Padi4	NM_011061	0	intragenic	Padi4	NM_011061	0	intragenic
4.1468	9	chr4:146801127-146801220	2510039O18Rik	NM_029841	10059	3'	Nppb	NM_008726	28524	5'
4.1512	9	chr4:151195920-151195940	Rpl22	NM_009079	18060	3'	BC098195	BC098195	28361	5'
4.15331	9	chr4:153310283-153310312	Prdm16	NM_027504	99182	Intronic	Prdm16	NM_027504	10140	Intronic
4.4428	9	chr4:44281613-44281662	Rnf38	NM_001038993	92198	5'	Melk	NM_010790	40378	5'
4.4453	9	chr4:44533010-44533079	Melk	NM_010790	147269	intergenic	Zcchc7	NM_177027	244622	intergenic
5.11545	9	chr5:115454399-115454487	Cabp1	NM_013879	7323	5'	Pop5	NM_026398	42402	5'
5.11621	9	chr5:116207075-116207118	Cit	NM_007708	196	Intronic	Cit	NM_007708	731	Intronic
5.11681	9	chr5:116815030-116815103	1500001A10Rik	BC056392	71531	1st intron	1500001A10Rik	BC056392	37265	1st intron
5.1181	9	chr5:118105840-118105926	Nos1	BC083183	2576	1st intron	Nos1	BC083183	21984	1st intron
5.12798	9	chr5:127985086-127985201	Glt1d1	NM_177005	4038	3'	C630028F04Rik	NM_172885	87549	3'
5.12836	9	chr5:128361957-128361994	C630028F04Rik	NM_172885	88348	Intronic	C630028F04Rik	NM_172885	64109	Intronic
5.13068	9	chr5:130678275-130678290	A330070K13Rik	NM_198665	8948	5'	Caln1	NM_021371	55220	5'
5.13481	9	chr5:134813338-134813432	Cyln2	NM_009990	5616	Intronic	Cyln2	NM_009990	6287	Intronic
5.14224	9	chr5:142237654-142237775	Sdk1	AK147578	9526	Intronic	Sdk1	AK147578	13497	Intronic
5.1475	9	chr5:147499096-147499113	Gsh1	NM_008178	0	1st exon	Gsh1	NM_008178	0	1st exon
5.14949	9	chr5:149494918-149494998	Hmgb1	NM_010439	131572	intergenic	Uspl1	AK145409	52	5'
5.23925	9	chr5:23926663-23926683	Accn3	BC054460	0	intragenic	Accn3	BC054460	0	intragenic
5.26335	9	chr5:26337684-26337838	Actr3b	NM_001004365	977359	intergenic	Speer4a	NM_029376	27714	3'
5.37121	9	chr5:37124391-37124432	Man2b2	NM_008550	5535	5'	Ppp2r2c	NM_172994	32406	5'
5.37417	9	chr5:37420180-37420272	Gababrbp	NM_178394	6682	3'	Crmp1	BC065046	110101	intergenic
5.65744	9	chr5:65746180-65746199	1110003E01Rik	NM_133697	6482	Intronic	1110003E01Rik	NM_133697	1337	Intronic
6.11381	9	chr6:113809121-113809212	Atp2b2	AK147399	744	1st intron	Atp2b2	AK147399	47862	1st intron
6.30101	9	chr6:30102400-30102408	Nrf1	NM_010938	0	intragenic	Nrf1	NM_010938	0	intragenic
6.39828	9	chr6:39828977-39829045	Mrps33	NM_010270	88468	5'	LOC434008	NM_001004182	210847	intergenic
6.85459	9	chr6:85464018-85464035	Fbxo41	NM_001001160	13505	1st intron	Fbxo41	NM_001001160	4333	1st intron
6.90816	9	chr6:90818034-90818119	Iqsec1	NM_182784	190290	intergenic	Nup210	BC052468	160496	intergenic
7.10699	9	chr7:106993148-106993252	Nalp14	NM_001002894	3921	3'	1700012H05Rik	NM_029660	7420	5'
7.11184	9	chr7:111837096-111837150	Usp47	BC108425	22196	1st intron	Usp47	BC108425	983	1st intron
7.12219	9	chr7:122199732-122199862	Prkcb1	NM_008855	118105	Intronic	Prkcb1	NM_008855	16308	Intronic
7.12302	9	chr7:123026719-123026745	Slc5a11	NM_146198	2467	Intronic	Slc5a11	AF518726	12	Intronic
7.13103	9	chr7:131036424-131036431	5430419D17Rik	NM_175166	408	Intronic	5430419D17Rik	NM_175166	1209	Intronic
7.18377	9	chr7:18379086-18379179	Gpr4	NM_175668	7976	1st intron	Gpr4	NM_175668	778	1st intron
7.18524	9	chr7:18527047-18527064	Ppp1r13l	NM_001010836	7217	1st intron	Ppp1r13l	NM_001010836	7	1st intron
7.26198	9	chr7:26198488-26198591	Nalp4a	NM_172896	14321	3'	Nalp9a	NM_194056	61031	5'
7.27362	9	chr7:27362755-27362810	BC089566	BC089566	0	1st exon	BC089566	BC089566	0	1st exon
7.2887	9	chr7:28871514-28871559	Spred3	NM_182927	582	Intronic	Spred3	NM_182927	81	Intronic
7.29175	9	chr7:29178235-29178249	AK172968	AK172968	34657	1st intron	AK172968	AK172968	48981	1st intron
7.46241	9	chr7:4625894-4625925	6430526N21Rik	NM_001033383	2167	1st intron	6430526N21Rik	NM_001033383	6167	1st intron
7.57309	9	chr7:5733639-5733659	Nalp4c	AY596194	25414	3'	2210018M03Rik	NM_001013012	925	3'
7.80247	9	chr7:80251471-80251485	Fes	AK143639	0	intragenic	Fes	AK143639	0	intragenic
7.82741	9	chr7:82741742-82741821	Eftud1	NM_175317	87744	3'	A530021J07	NM_177895	282872	intergenic
7.91992	9	chr7:9200510-9200519	V1re11	NM_134230	50270	5'	Zik1	NM_009577	161603	intergenic
7.96209	9	chr7:96209780-96209864	Odz4	AK147579	122640	1st intron	Odz4	AK147329	20724	1st intron
8.11266	9	chr8:112667617-112667623	4930566A11Rik	NM_029468	53559	3'	Ap1g1	X54424	168	5'
8.12006	9	chr8:120059844-120059948	Bcmo1	NM_021486	40445	3'	AK085367	AK085367	83196	5'
8.12328	9	chr8:123284646-123284688	6430548M08Rik	AK133157	233386	intergenic	Gse1	NM_198671	90174	5'
8.12401	9	chr8:12400976-12400994	Sox1	NM_009233	3477	3'	LOC434280	NM_001013812	23866	1st intron
8.12462	9	chr8:124622488-124622523	Jph3	NM_020605	5411	1st intron	Jph3	NM_020605	16550	1st intron
8.12464	9	chr8:124647760-124647817	Jph3	NM_020605	7954	Intronic	Jph3	NM_020605	20461	Intronic
8.13447	9	chr8:13448330-13448365	Grk1	NM_011881	30791	3'	Gas6	NM_019521	17004	3'
8.14391	9	chr8:14393260-14393460	Dlgap2	AK082945	11195	1st intron	Dlgap2	AK082945	137644	1st intron
8.19784	9	chr8:19784674-19784765	A430108E01Rik	AK033345	0	1st exon	A430108E01Rik	AK033345	0	1st exon
8.2444	9	chr8:24440977-24440998	Ank1	AK158131	181	1st intron	Ank1	M84756	59678	5'
8.75551	9	chr8:75551031-75551093	A230063L24Rik	AK162888	1419	Intronic	A230063L24Rik	AK162888	2069	Intronic
8.91714	9	chr8:91714156-91714340	Cyld	AK147204	72202	3'	Sall1	NM_021390	204099	intergenic
8.98867	9	chr8:98868509-98868568	Got2	NM_010325	91044	5'	Cdh8	AK044046	3045060	intergenic
9.1053	9	chr9:10531747-10531852	AK138164	AK138164	150819	Intronic	AK138164	AK138164	70702	Intronic
9.1086	9	chr9:108599478-108599487	Prkar2a	NM_008924	1497	Intronic	Prkar2a	NM_008924	1969	Intronic
9.12238	9	chr9:122388940-122388954	Abhd5	NM_026179	158726	intergenic	D9Ertd402e	NM_001013405	265349	intergenic
9.27057	9	chr9:27057702-27057741	Jam3	NM_023277	152895	intergenic	Spata19	NM_029299	88544	5'
9.34662	9	chr9:34662818-34662869	Kirrel3	NM_026324	1311	Intronic	A130066N16Rik	NM_001002772	5059	3'
10.8456	9	chr10:84558425-84558432	Mterfd3	NM_028832	628	5'	Cry1	NM_007771	3070	3'
10.9081	9	chr10:90814299-90814387	Tmpo	AK141845	212976	intergenic	Nedd1	NM_008682	1300200	intergenic
11.104	9	chr11:104014286-104014400	4933407P14Rik	BC100418	7333	3'	Mapt	NM_001038609	33181	5'
11.1152	9	chr11:115152374-115152414	Otop3	AB087505	1402	1st intron	Otop3	AB087505	3012	1st intron
11.1187	9	chr11:118722847-118722951	D11Bwg0517e	AK160816	95393	1st intron	D11Bwg0517e	AK160816	2493	1st intron
11.1199	9	chr11:119895498-119895554	Azi1	AK133245	1995	Intronic	Azi1	AK133245	1806	Intronic
11.1204	9	chr11:120440718-120440730	Sirt7	BC026650	40	Intronic	Sirt7	BC026650	37	Intronic
11.3107	9	chr11:31069886-31069897	Asb3	NM_023906	68421	3'	Stc2	NM_011491	189549	intergenic
11.5415	9	chr11:54146705-54146724	Il3	NM_010556	36014	5'	Acsl6	NM_001033598	531	5'
11.5565	9	chr11:55654369-55654405	Glra1	AK078258	202766	intergenic	Nmur2	NM_153079	214024	intergenic
11.669	9	chr11:66897690-66897714	AK011251	AK011251	16176	3'	Myh2	NM_144961	89710	5'
11.8101	9	chr11:81010285-81010287	Accn1	NM_007384	41188	5'	1700071K01Rik	NM_001033765	378409	intergenic
11.8213	9	chr11:82129450-82129482	Ccl1	M23501	133459	intergenic	Gm644	NM_023438	75627	5'
11.8239	9	chr11:82392378-82392415	Gm644	NM_023438	129874	intergenic	AY512914	AY512914	57150	5'
11.9138	9	chr11:9140202-9140266	AK036546	AK036546	15691	3'	AY160971	AY160971	61054	5'
11.9504	9	chr11:95043726-95043766	Dlx4	NM_007867	81393	5'	Tac4	NM_053093	33871	5'
12.1079	9	chr12:107918086-107918238	Vrk1	NM_011705	1439702	intergenic	AK014062	AK014062	23782	5'
12.124	9	chr12:12405355-12405430	D12Ertd553e	NM_029758	3047	3'	Mycn	NM_008709	556687	intergenic
12.1367	9	chr12:13665656-13665665	BC072598	BC072598	55335	3'	AW125753	NM_029007	507476	intergenic
12.3392	9	chr12:33923578-33923584	Atxn7l1	NM_001033436	12201	Intronic	Atxn7l1	NM_001033436	3585	Intronic
12.3955	9	chr12:3955659-3955707	Pomc1	NM_008895	621	1st intron	Pomc1	NM_008895	2407	1st intron
12.6798	9	chr12:67978074-67978093	Mamdc1	AK137667	190672	1st intron	Mamdc1	AK137667	161490	1st intron
12.8924	9	chr12:89244430-89244461	Nrxn3	AK149250	7780	1st intron	Nrxn3	AK149250	63536	1st intron
13.1021	9	chr13:102133078-102133103	Slc30a5	NM_022885	199406	intergenic	Pik3r1	NM_001024955	647928	intergenic
13.1527	9	chr13:15267301-15267326	Gli3	AK158261	12315	1st intron	Gli3	AK158261	1572	1st intron
13.2479	9	chr13:24790364-24790384	Gmnn	BC020061	21046	5'	BC005537	NM_024473	18746	5'
13.5495	9	chr13:54955169-54955183	Tspan17	NM_028841	148786	intergenic	Unc5a	BC058084	3855	5'
13.5543	9	chr13:55429019-55429174	F12	NM_021489	974	Intronic	F12	NM_021489	641	Intronic
13.5867	9	chr13:58673194-58673196	Slc28a3	BC010472	52707	5'	Ntrk2	NM_008745	143022	intergenic
13.5975	9	chr13:59755956-59755962	4921517D22Rik	NM_183290	52235	5'	Hbld2	NM_026921	9077	3'
13.9849	9	chr13:98492795-98492859	Enc1	NM_007930	139094	intergenic	BC054101	BC054101	102127	intergenic
14.1161	9	chr14:11617221-11617314	Cadps	AK122453	921	5'	C630025C03	NM_177813	333386	intergenic
14.3598	9	chr14:35979921-35979957	Lrrc22	NM_173418	0	intragenic	Lrrc22	NM_173418	0	intragenic
14.5398	9	chr14:53981330-53981445	1500001L15Rik	NM_026890	3181	3'	Zfhx2	NM_001039198	34343	3'
14.6312	9	chr14:63117875-63117926	AK036170	AK036170	12923	5'	Msra	BC014738	46636	Intronic
14.6512	9	chr14:65115620-65115639	Ptk2b	AK150105	2842	Intronic	Ptk2b	AK150105	1504	Intronic
15.2769	9	chr15:27692224-27692247	BC092282	BC092282	3446	Intronic	BC092282	BC092282	273	Intronic
15.3478	9	chr15:34782057-34782082	Kcns2	NM_181317	0	1st exon	Kcns2	NM_181317	0	1st exon
15.6796	9	chr15:67957494-67957559	Zfp406	NM_198644	8783	Intronic	Zfp406	NM_198644	18644	Intronic
15.8105	9	chr15:81047506-81047527	4930483J18Rik	NM_026288	27609	3'	Gpr24	AK134867	15354	5'
15.8375	9	chr15:83752590-83752632	4931407K02Rik	BC065111	384	Intronic	4931407K02Rik	BC065111	8226	Intronic
15.9952	9	chr15:99525411-99525559	Accn2	NM_009597	0	intragenic	Accn2	NM_009597	0	intragenic
16.1802	9	chr16:18023023-18023069	Prodh	AK085938	20320	5'	Rtn4r	NM_022982	18221	5'
16.2034	9	chr16:20339335-20339361	Abcc5	NM_013790	3320	1st intron	Abcc5	NM_013790	441	1st intron
16.2053	9	chr16:20533553-20533616	AK013788	AK013788	0	intragenic	AK013788	AK013788	0	intragenic
16.2998	9	chr16:29985252-29985316	Hes1	NM_008235	0	1st exon	Hes1	NM_008235	0	1st exon
16.9122	9	chr16:91221913-91221921	Olig1	NM_016968	61120	3'	Ifnar2	NM_010509	39839	5'
16.9508	9	chr16:95081561-95081572	Kcnj6	NM_010606	31539	1st intron	Kcnj6	NM_010606	24417	1st intron
17.2395	9	chr17:23951299-23951414	Ccnf	NM_007634	0	intragenic	Ccnf	NM_007634	0	intragenic
17.3262	9	chr17:32618844-32618855	BC066107	NM_207245	0	intragenic	BC066107	NM_207245	0	intragenic
17.3467	9	chr17:34672271-34672292	Ddah2	BC003328	2132	3'	Ly6g6c	NM_023463	3098	5'
17.3572	9	chr17:35719605-35719616	AY989826	AY989826	27334	5'	H2-T10	NM_010395	5531	3'
17.3874	9	chr17:38737268-38737372	Olfr130	NM_146487	1061141	intergenic	Pgk2	NM_031190	933176	intergenic
17.6527	9	chr17:65269912-65269922	E130009J12Rik	AF338468	109290	Intronic	E130009J12Rik	AK135727	8819	3'
17.6987	9	chr17:69874095-69874172	Dlgap1	AK220515	0	1st exon	Dlgap1	AK220515	0	1st exon
18.2582	9	chr18:25820479-25820590	AK082301	AK082301	59176	5'	Brunol4	BC052744	1887	Intronic
18.2589	9	chr18:25895923-25895982	Brunol4	BC052744	73447	1st intron	Brunol4	BC052744	398	1st intron
18.3497	9	chr18:34971136-34971153	Reep2	NM_144865	2237	Intronic	Reep2	NM_144865	80	Intronic
18.3626	9	chr18:36256310-36256445	Psd2	BC066026	115690	intergenic	Pura	NM_008989	150757	intergenic
18.3669	9	chr18:36687355-36687401	Slc4a9	AK142545	5132	3'	BC091647	BC091647	81634	5'
18.3722	9	chr18:37218033-37218046	Pcdhac1	NM_001003671	0	1st exon	Pcdhac1	NM_001003671	0	1st exon
18.3734	9	chr18:37344300-37344311	Pcdha1	BC082326	30673	3'	Pcdhb3	NM_053128	82650	5'
18.6668	9	chr18:66686498-66686599	AK078927	AK078927	49442	3'	Mc4r	NM_016977	296527	intergenic
18.7781	9	chr18:77810309-77810324	AK133955	AK133955	137587	intergenic	8030462N17Rik	NM_178670	27039	3'
19.1025	9	chr19:10249860-10249967	Fads2	NM_019699	81365	5'	Fads1	BC026831	51	5'
19.2323	9	chr19:23229733-23229753	AK046642	AK046642	20260	5'	Klf9	NM_010638	2035	1st intron
19.359	9	chr19:35898339-35898398	Pank1	AF347700	952919	intergenic	A830019P07Rik	NM_183214	2033	3'
19.4515	9	chr19:45151381-45151419	Kazald1	NM_178929	18807	3'	Tlx1	NM_021901	52624	5'
X.71106099	9	chrX:71109085-71109108	Ikbkg	NM_178590	404856	intergenic	Gab3	AK039787	110465	intergenic
X.71896337	9	chrX:71897555-71897571	Rab39b	NM_175122	66639	5'	Pls3	BC005459	140820	intergenic
Y.296404	9	chrY:300850-300863	Jarid1d	NM_011419	20602	3'	Eif2s3y	AK012186	46180	5'
Y.310604	9	chrY:317781-317872	Jarid1d	NM_011419	37572	3'	Eif2s3y	AK012186	29210	5'
Y.457343	9	chrY:467182-467605	Uty	AF057367	939	Intronic	Uty	AF057367	84	Intronic
Y.626880	9	chrY:633586-633723	Ddx3y	NM_012008	10656	5'	Usp9y	NM_148943	1749	3'
Y.962667	9	chrY:963073-965542	Usp9y	NM_148943	168082	intergenic	Zfy2	NM_009571	426775	intergenic
1.13401	10	chr1:134016111-134016173	Pctk3	NM_008795	48912	5'	Lemd1	NM_001033250	40450	3'
1.19474	10	chr1:194736871-194736893	Syt14	NM_181546	460	5'	AA408296	NM_145415	68243	3'
1.74474	10	chr1:74475690-74475719	Usp37	NM_176972	11385	1st intron	Plcd4	AK140231	404	5'
1.74872	10	chr1:74873204-74873204	B230363K08Rik	NM_001039495	4398	5'	Ihh	BC046984	5320	3'
2.12941	10	chr2:129407316-129407339	Pdyn	NM_018863	16053	5'	Stk35	NM_183262	84673	5'
2.15163	10	chr2:151629502-151629569	Angpt4	AK132988	1326	Intronic	Angpt4	AK132988	809	Intronic
2.1602	10	chr2:160207198-160207242	Mafb	NM_010658	148777	intergenic	Top1	NM_009408	130449	intergenic
2.16315	10	chr2:163150210-163150312	Gdap1l1	AK140488	3496	3'	D930001I22Rik	AK052945	7570	3'
2.16716	10	chr2:167169403-167169462	Slc9a8	NM_148929	1229	3'	Spata2	NM_170756	3166	3'
2.17954	10	chr2:179545496-179545535	Cdh4	NM_009867	171296	Intronic	Cdh4	NM_009867	164145	Intronic
2.18081	10	chr2:180814787-180814804	AK133152	AK133152	60757	5'	Ythdf1	NM_173761	18989	3'
2.29855	10	chr2:29857537-29857588	Wdr34	NM_001008498	681	Intronic	Wdr34	NM_001008498	2620	Intronic
3.10834	10	chr3:108342910-108342955	Sypl2	NM_008596	194	Intronic	Sypl2	NM_008596	1699	Intronic
3.11322	10	chr3:113219170-113219206	Prmt6	NM_178891	2840156	intergenic	Amy2	BC100579	158047	intergenic
3.88083	10	chr3:88083415-88083431	Bcan	NM_007529	140	Intronic	Bcan	NM_007529	247	Intronic
4.11249	10	chr4:11249330-11249363	2810013E07Rik	NM_178112	67970	5'	Rbm35a	BC059280	9734	3'
4.11968	10	chr4:119684802-119684880	Edn2	BC037042	19846	3'	Foxo6	NM_194060	79870	3'
4.12438	10	chr4:124380396-124380429	Gm50	NM_001007573	15937	5'	Epha10	NM_177671	3714	5'
4.12506	10	chr4:125058920-125058958	Ftl1	BC106145	51637	3'	Csf3r	NM_007782	468099	intergenic
4.12839	10	chr4:128394249-128394294	Trim62	NM_178110	7390	1st intron	Trim62	NM_178110	4851	1st intron
4.13086	10	chr4:130859697-130859794	Matn1	NM_010769	632194	intergenic	Ptpru	NM_011214	180787	intergenic
4.14778	10	chr4:147787031-147787131	AK010559	AK010559	0	intragenic	AK010559	AK010559	0	intragenic
4.42966	10	chr4:42966423-42966433	N28178	AK122428	1180	3'	Dnajb5	NM_019874	7764	5'
5.11163	10	chr5:111633444-111633466	AK138421	AK138421	930	1st intron	AK138421	AK138421	1231	1st intron
5.11427	10	chr5:114276257-114276261	Dao1	BC018377	50	Intronic	Dao1	BC018377	2394	Intronic
5.1167	10	chr5:116704813-116704839	1500001A10Rik	BC056392	0	intragenic	1500001A10Rik	BC056392	0	intragenic
5.12226	10	chr5:122264215-122264288	Cutl2	BC065113	78719	Intronic	Cutl2	BC065113	40134	Intronic
5.12748	10	chr5:127481126-127481284	Aacs	NM_030210	1674341	intergenic	AK157823	AK157823	49823	5'
5.12776	10	chr5:127761258-127761263	AK157823	AK157823	9007	Intronic	AK157823	AK157823	32803	Intronic
5.12923	10	chr5:129232148-129232156	AK044685	AK044685	71773	Intronic	AK044685	AK044685	35521	Intronic
5.14047	10	chr5:140470580-140470635	Mad1l1	AF083813	24075	Intronic	Mad1l1	AF083813	43363	Intronic
5.14653	10	chr5:146532050-146532169	Rnf6	NM_028774	6438	5'	Cdk8	NM_153599	3802	5'
5.14695	10	chr5:146955081-146955132	Gpr12	NM_001010941	59518	5'	Usp12	BC068136	90053	3'
5.2401	10	chr5:24013245-24013245	Centg3	NM_139153	1133	3'	Gbx1	NM_015739	1244	3'
5.30861	10	chr5:30864636-30864707	AK006670	AK006670	42254	5'	Kcnk3	AB013345	90	5'
5.31413	10	chr5:31415779-31415789	Ucn	NM_021290	308	5'	Mpv17	NM_008622	1743	3'
5.35798	10	chr5:35800413-35800435	Hmx1	NM_010445	90693	3'	Cpz	NM_153107	18770	3'
6.11415	10	chr6:114152849-114152855	Slc6a11	NM_172890	25084	Intronic	Slc6a11	NM_172890	7352	Intronic
6.11929	10	chr6:119286328-119286344	AI841794	NM_172492	0	intragenic	AI841794	NM_172492	0	intragenic
6.12262	10	chr6:122625332-122625381	Dppa3	NM_139218	29466	3'	AK010332 (Nanog)	AK010332 (Nanog)	47855	5'
6.13855	10	chr6:138547663-138547758	Lmo3	NM_207222	1546	5'	Igbp1b	NM_015777	73574	3'
6.14722	10	chr6:147225771-147225794	Pthlh	BC058187	4726	5'	1810060J02Rik	NM_025911	207257	intergenic
6.28293	10	chr6:28295418-28295422	AK018330	AK018330	126508	intergenic	Gcc1	NM_028900	71279	3'
6.39934	10	chr6:39941354-39941397	Mrps33	NM_010270	200832	intergenic	LOC434008	NM_001004182	98483	5'
6.68729	10	chr6:68729045-68729068	Tacstd2	NM_020047	1263682	intergenic	BC080787	BC080787	1807951	intergenic
7.12577	10	chr7:125776875-125776950	BC030902	BC030902	110973	intergenic	Xpo6	AK154709	115949	intergenic
7.12662	10	chr7:126616920-126616954	BC093505	BC093505	695	Intronic	BC093505	BC093505	1675	Intronic
7.12926	10	chr7:129260826-129260860	Sec23ip	NM_001029982	685909	intergenic	Brwd2	AK170058	122221	intergenic
7.13893	10	chr7:138936223-138936226	Bnip3	NM_009760	188375	intergenic	Dpysl4	NM_011993	1167	5'
7.16028	10	chr7:16030361-16030453	Prkd2	NM_178900	1424	3'	Gng8	NM_010320	19899	5'
7.24394	10	chr7:24395716-24395759	Tex101	NM_019981	14935	5'	BC049730	NM_199150	22280	5'
7.30003	10	chr7:30004030-30004126	BC054747	BC054747	14922	5'	AK005167	AK005167	6816	5'
7.30142	10	chr7:30143122-30143203	AY078069	NM_172142	5657	3'	Aplp1	NM_007467	578	3'
7.31162	10	chr7:31164686-31164770	Abpe	NM_207262	150991	intergenic	Abpd	NM_001009952	1908373	intergenic
7.60566	10	chr7:6060569-6060623	Olfr1344	AK029628	14819	3'	Olfr1350	NM_146389	113481	intergenic
7.98069	10	chr7:98070567-98070579	Capn5	NM_007602	17188	5'	Phca	NM_025408	18279	3'
8.12622	10	chr8:126218925-126218999	Spire2	NM_172287	0	1st exon	Spire2	NM_172287	0	1st exon
8.1263	10	chr8:126300335-126300563	Tubb3	NM_023279	2697	1st intron	Tubb3	NM_023279	3732	1st intron
8.23458	10	chr8:23460954-23460991	Atp7b	NM_007511	503	Intronic	Atp7b	NM_007511	125	Intronic
8.77746	10	chr8:77748100-77748125	AK144838	AK144838	18103	5'	AK018615	AK018615	21132	5'
8.81325	10	chr8:81327528-81327672	1700031F13Rik	NM_183096	37203	3'	Pou4f2	NM_138944	1479	3'
8.89403	10	chr8:89403141-89403253	Abcc12	AK133175	729	Intronic	Abcc12	AK133175	4213	Intronic
9.10665	10	chr9:106647300-106647354	Rad54l2	NM_030730	141	5'	B930007L02Rik	NM_001015507	32748	5'
9.20625	10	chr9:20625583-20625587	Angptl6	NM_145154	0	intragenic	Angptl6	NM_145154	0	intragenic
9.21799	10	chr9:21801065-21801138	Elavl3	NM_010487	13839	1st intron	Elavl3	NM_010487	889	1st intron
9.34587	10	chr9:34587558-34587591	Kirrel3	NM_026324	348851	1st intron	Kirrel3	NM_026324	73879	1st intron
9.4978	10	chr9:49781447-49781470	Ncam1	NM_010875	230338	intergenic	1600029D21Rik	AK002767	465297	intergenic
9.53467	10	chr9:53468544-53468570	Rab39	NM_175562	0	1st exon	Rab39	NM_175562	0	1st exon
9.54823	10	chr9:54824485-54824543	Chrna3	AK080415	0	1st exon	Chrna3	AK080415	0	1st exon
10.1207	10	chr10:120712758-120712825	BC072607	BC072607	2848	1st intron	BC072607	BC072607	911	1st intron
10.1264	10	chr10:126398702-126398734	Ctdsp2	NM_146012	0	1st exon	Ctdsp2	NM_146012	0	1st exon
10.3966	10	chr10:39657166-39657196	BC021785	AK165493	7275	Intronic	BC021785	NM_001001489	2052	3'
10.4089	10	chr10:40897162-40897288	A530089I17Rik	NM_133999	20111	Intronic	A530089I17Rik	NM_133999	12087	Intronic
10.7642	10	chr10:76421994-76422021	Pcbp3	AK079564	16373	5'	AK143813	AK143813	33702	5'
10.8418	10	chr10:84184728-84184743	Polr3b	NM_027423	27759	3'	Rfx4	NM_001024918	1110	5'
10.8865	10	chr10:88654400-88654476	Tmem16d	AK078364	75195	1st intron	Tmem16d	AK039728	32328	1st intron
11.1142	10	chr11:114181209-114181234	AK132953	AK132953	111461	intergenic	4932435O22Rik	NM_177008	48272	3'
11.1151	10	chr11:115074355-115074390	Grin2c	NM_010350	0	intragenic	Grin2c	NM_010350	0	intragenic
11.3052	10	chr11:3053822-3053889	AK133558	AK133558	354	Intronic	AK133558	AK133558	1545	Intronic
11.3073	10	chr11:3076555-3076632	BC046305	BC046305	5886	Intronic	BC046305	BC046305	835	Intronic
11.3624	10	chr11:36239947-36239998	Odz2	NM_011856	11221	Intronic	Odz2	NM_011856	468117	Intronic
11.3974	10	chr11:3976790-3976850	Sec14l3	NM_001029937	205	3'	1700020C11Rik	NM_026443	14662	3'
11.5814	10	chr11:58139478-58139532	Zfp672	AK019676	0	1st exon	Zfp672	AK019676	0	1st exon
11.6986	10	chr11:69860006-69860031	Dlgh4	BC014807	56	Intronic	Dlgh4	BC014807	451	Intronic
11.7175	10	chr11:71753481-71753541	BC030477	NM_177618	147672	intergenic	Aipl1	BC028285	91404	3'
11.7193	10	chr11:71929602-71929728	A330068P14Rik	NM_001024927	1106	Intronic	A330068P14Rik	NM_001024927	6615	Intronic
11.7443	10	chr11:74435567-74435585	Garnl4	NM_001015046	29257	5'	E130309D14Rik	NM_001013784	222	5'
11.8015	10	chr11:80149062-80149083	Rhbdl4	NM_139228	970	Intronic	Rhbdl4	NM_139228	4608	Intronic
11.8043	10	chr11:80429991-80430042	Cdk5r1	NM_009871	132642	intergenic	Tmem98	NM_029537	196592	intergenic
11.878	10	chr11:87802652-87802693	Dynll2	NM_026556	2467	1st intron	Dynll2	NM_026556	764	1st intron
12.1122	10	chr12:112204727-112204758	2810002N01Rik	NM_026511	22743	3'	Kns2	AK031309	1943	5'
12.1668	10	chr12:16679216-16679253	Ntsr2	AK158943	0	1st exon	Ntsr2	AK158943	0	1st exon
12.3367	10	chr12:33670095-33670144	1110049B09Rik	NM_001024478	2499	Intronic	1110049B09Rik	NM_001024478	1117	Intronic
12.3806	10	chr12:3806390-3806424	AK086254	AK086254	175	1st intron	Dnmt3a	AK158722	114	5'
12.5619	10	chr12:56190625-56190658	Srp54	BC019683	9508	3'	Srp54	BC005543	4333	Intronic
12.7082	10	chr12:70826781-70826839	Spg3a	NM_178628	213	Intronic	Spg3a	NM_178628	17735	Intronic
12.7126	10	chr12:71265831-71265839	Trim9	AK163123	0	1st exon	Trim9	AK129109	0	1st exon
12.7334	10	chr12:73341635-73341783	Rtn1	NM_153457	13932	5'	4921529O18Rik	NM_030070	19060	5'
12.8743	10	chr12:87437064-87437064	Esrrb	NM_011934	26341	3'	Vash1	AK090166	130737	intergenic
13.1114	10	chr13:111401004-111401055	Rab3c	AK014050	0	1st exon	Rab3c	AK014050	0	1st exon
13.4246	10	chr13:42458118-42458211	Edn1	NM_010104	139203	intergenic	Phactr1	NM_198419	233429	intergenic
13.5787	10	chr13:57877354-57877380	Spock1	AK039058	171590	Intronic	Spock1	AK039058	39656	Intronic
13.7555	10	chr13:75554747-75554855	Cast	AB026997	280039	intergenic	Pcsk1	AK043742	1115	5'
14.7895	10	chr14:78950119-78950201	Olfm4	AK133536	193145	intergenic	Pcdh17	BC079850	4303428	intergenic
15.1003	10	chr15:100297225-100297245	Letmd1	NM_134093	0	1st exon	Letmd1	NM_134093	0	1st exon
15.276	10	chr15:27599868-27599877	BC052328	AK152590	0	intragenic	BC052328	AK152590	0	intragenic
15.7285	10	chr15:72854184-72854307	1810044A24Rik	NM_180662	902	Intronic	1810044A24Rik	NM_180662	4531	Intronic
15.7858	10	chr15:78577482-78577683	BC094219	NM_183141	32214	5'	Mfng	NM_008595	5554	3'
15.8391	10	chr15:83914527-83914680	Sult4a1	NM_013873	143	Intronic	Sult4a1	NM_013873	3120	Intronic
15.8468	10	chr15:84681834-84681841	AK042863	AK042863	45913	Intronic	AK042863	AK042863	666	Intronic
15.8771	10	chr15:87715012-87715059	AW049604	NM_134096	127907	intergenic	Zdhhc25	NM_027306	713031	intergenic
16.2848	10	chr16:28479592-28479649	Fgf12	AK148215	118312	intergenic	Fgf12	NM_010199	192959	Intronic
16.3681	10	chr16:36806907-36806969	Iqcb1	BC029084	14986	3'	Hcls1	NM_008225	47314	5'
16.5615	10	chr16:5616344-5616422	5730409G15Rik	AK133590	445106	intergenic	A2bp1	BC053009	183729	intergenic
16.9374	10	chr16:93739197-93739224	BC098072	BC098072	1393	Intronic	BC098072	BC098072	2417	Intronic
17.1488	10	chr17:14884720-14884741	2410011O22Rik	NM_001034891	115546	intergenic	AK145347	AK145347	169236	intergenic
17.2497	10	chr17:24967320-24967395	Gnptg	NM_172529	3847	Intronic	Gnptg	NM_172529	16	Intronic
17.2979	10	chr17:29795308-29795319	Zfand3	BC100559	7451	Intronic	Zfand3	BC100559	67020	Intronic
17.3564	10	chr17:35640600-35640608	H2-T23	NM_010398	129	1st intron	H2-T23	NM_010398	56	1st intron
17.45	10	chr17:45000029-45000140	Aarsl	NM_198608	15661	3'	Gm323	NM_001013749	5447	3'
17.725	10	chr17:72508155-72508197	Alk	NM_007439	0	1st exon	Alk	NM_007439	0	1st exon
17.9975	10	chr17:9978538-9978614	4932702K14Rik	NM_026226	465523	intergenic	Qk	AF090402	71331	3'
18.2106	10	chr18:21059292-21059375	D030074E01Rik	NM_029491	20245	5'	Rnf125	AK016103	45147	5'
18.7705	10	chr18:77051976-77051977	Smad2	NM_010754	620880	intergenic	Ier3ip1	NM_025409	82513	5'
18.8036	10	chr18:80359559-80359592	1110032A13Rik	NM_199197	154	Intronic	1110032A13Rik	NM_199197	146	Intronic
19.2556	10	chr19:25555908-25556008	Ankrd15	BC058673	54364	3'	Dmrt1	AY169787	16843	5'
19.5537	10	chr19:55369521-55369532	Zdhhc6	NM_001033573	244	5'	Vti1a	AK014541	49	5'
19.618	10	chr19:6181686-6181718	4933430F08Rik	NM_028967	9229	3'	AK007250	AK007250	2703	5'
Y.1715062	10	chrY:1718578-1718605	Zfy2	NM_009571	263313	intergenic	BC111527	BC111527	228748	intergenic
1.12124	11	chr1:121247064-121247178	Inhbb	NM_008381	1478	1st intron	Inhbb	NM_008381	1050	1st intron
1.63546	11	chr1:63548963-63549029	Adam23	NM_011780	18206	3'	Mdh1b	BC050786	84105	3'
1.84573	11	chr1:84575376-84575413	Dner	NM_152915	148	5'	Trip12	NM_133975	24825	3'
1.95101	11	chr1:95102991-95103095	Sned1	AJ584850	29	Intronic	Sned1	AJ584850	1410	Intronic
2.12728	11	chr2:127276156-127276170	Zfp661	NM_028141	53	5'	Mrps5	NM_029963	2702	5'
2.15198	11	chr2:151980178-151980192	Csnk2a1	NM_007788	6899	3'	Tbc1d20	NM_024196	5126	5'
2.16493	11	chr2:164930907-164930926	Cdh22	NM_174988	4992	5'	Slc35c2	BC064092	36842	3'
2.1718	11	chr2:171802083-171802133	Cbln4	NM_175631	67437	5'	Mc3r	NM_008561	137587	intergenic
2.18034	11	chr2:180340639-180340656	AK018689	AK018689	70507	3'	Slco4a1	NM_148933	49737	5'
2.24308	11	chr2:24310808-24310851	Pax8	NM_011040	13254	5'	Cacna1b	AF042317	117748	intergenic
2.30765	11	chr2:30764990-30765007	Ptges	NM_022415	39692	5'	Tor1b	NM_133673	10010	5'
3.13667	11	chr3:136667502-136667534	Ppp3ca	BC096652	59230	1st intron	Ppp3ca	BC096652	67593	1st intron
3.31496	11	chr3:31499957-31499968	Slc7a14	NM_172861	51060	1st intron	Slc7a14	NM_172861	1085	1st intron
3.91298	11	chr3:91299437-91299511	Pglyrp4	NM_207263	473037	intergenic	Pglyrp3	NM_207247	801063	intergenic
3.95344	11	chr3:9535520-9535626	Gig1	NM_133218	77898	Intronic	Gig1	NM_133218	12562	Intronic
3.97986	11	chr3:97986548-97986581	Pde4dip	NM_177145	32847	5'	Sec22l1	NM_011342	66	5'
4.10961	11	chr4:109617609-109617613	Dmrta2	NM_172296	135995	intergenic	Elavl4	NM_010488	84057	3'
4.12626	11	chr4:126256114-126256270	AU040320	NM_001035526	0	1st exon	AU040320	NM_001035526	0	1st exon
4.13324	11	chr4:133240591-133240632	Hmgn2	NM_016957	544	5'	Dhdds	NM_026144	520	3'
4.13833	11	chr4:138331790-138331818	Tmco4	NM_029857	564	3'	Htr6	NM_021358	1680	3'
4.14713	11	chr4:147136588-147136772	BC072569	BC072569	4950	5'	Ubiad1	NM_027873	141615	intergenic
4.15227	11	chr4:152273958-152274004	Gm833	NM_001033414	729259	intergenic	BC049688	BC049688	526578	intergenic
4.15808	11	chr4:15808398-15808432	Calb1	NM_009788	0	1st exon	Calb1	NM_009788	0	1st exon
4.44454	11	chr4:44455822-44455847	Melk	NM_010790	70059	3'	Zcchc7	NM_177027	321832	intergenic
4.44598	11	chr4:44599919-44599960	Melk	NM_010790	214164	intergenic	Zcchc7	NM_177027	177727	intergenic
4.48993	11	chr4:48993698-48993733	2310039E09Rik	NM_026509	299122	intergenic	E130309F12Rik	AK034251	86661	5'
5.11078	11	chr5:110784827-110784873	Galnt9	AK032568	0	1st exon	Galnt9	AK032568	0	1st exon
5.11381	11	chr5:113814418-113814441	C530024P05Rik	NM_177292	0	intragenic	C530024P05Rik	NM_177292	0	intragenic
5.11599	11	chr5:115992502-115992507	AK041990	AK041990	14946	5'	Rpl29	BC094039	70046	3'
5.11709	11	chr5:117090916-117090981	AK019794	AK019794	8032	3'	2400003N08Rik	NM_178622	261765	intergenic
5.11717	11	chr5:117176060-117176089	AK019794	AK019794	93158	3'	2400003N08Rik	NM_178622	176639	intergenic
5.13065	11	chr5:130648698-130648741	Rsafd1	NM_001015876	22860	3'	A330070K13Rik	NM_198665	14833	3'
5.14023	11	chr5:140231554-140231580	A930017N06Rik	NM_175522	4371	3'	Mad1l1	AF083813	29595	3'
5.14666	11	chr5:146664754-146664864	Cdk8	NM_153599	57765	3'	Wasf3	NM_145155	24429	5'
5.25111	11	chr5:25111552-25111591	Gm443	NM_198621	83485	3'	AK140523	AK140523	58305	3'
5.33592	11	chr5:33592258-33592263	Ctbp1	AK160658	411	5'	Maea	BC058687	60169	5'
5.37026	11	chr5:37026132-37026169	BC051182	BC051182	41947	5'	Cno	NM_133724	9267	3'
5.37526	11	chr5:37528953-37528955	Gababrbp	NM_178394	115410	intergenic	Crmp1	BC065046	1373	5'
6.11919	11	chr6:119198850-119198919	Dcp1b	NM_001033379	13061	3'	5730412N02Rik	NM_001033382	3259	5'
6.28398	11	chr6:28400571-28400600	Pax4	NM_011038	1300	5'	AL033314	NM_019776	29771	5'
6.32638	11	chr6:32640481-32640503	Plxna4	NM_175750	122142	intergenic	Chchd3	NM_025336	81891	3'
6.88975	11	chr6:8898637-8898650	Nxph1	AK139424	0	1st exon	Nxph1	AK139424	0	1st exon
6.89034	11	chr6:89035781-89035797	Gpr175	BC028977	157933	intergenic	4933427D06Rik	NM_175017	26030	5'
7.10892	11	chr7:108920772-108920836	Ric3	NM_001038624	46303	5'	Lmo1	NM_057173	8942	3'
7.12152	11	chr7:121521615-121521637	AK122466	AK122466	81439	5'	Scnn1g	NM_011326	4027	5'
7.12922	11	chr7:129216825-129216882	Sec23ip	NM_001029982	641919	intergenic	Brwd2	AK170058	166211	intergenic
7.1318	11	chr7:131799111-131799139	Bub3	NM_009774	436079	intergenic	Gpr26	NM_173410	5676	5'
7.24849	11	chr7:24850734-24850771	Pou2f2	X57940	9532	5'	LOC434147	NM_001033781	10463	5'
7.30054	11	chr7:30055545-30055565	0610010E21Rik	NM_001033140	23323	3'	Lrfn3	NM_175478	8718	3'
7.4621	11	chr7:46215877-46215965	Otog	AK165831	87594	3'	Myod1	BC103613	28659	5'
7.63323	11	chr7:63323937-63323962	Otud7	NM_130880	72	1st intron	Otud7	NM_130880	170288	1st intron
8.10818	11	chr8:108180255-108180317	C730015A04Rik	NM_177788	105	Intronic	C730015A04Rik	NM_177788	1176	Intronic
8.11529	11	chr8:115290302-115290334	Terf2ip	BC012270	384446	intergenic	Cntnap4	NM_130457	165700	intergenic
8.12768	11	chr8:127679485-127679527	BC094596	BC094596	0	1st exon	BC094596	BC094596	0	1st exon
8.72628	11	chr8:72630881-72630914	AI449175	NM_172754	76396	5'	1200003I07Rik	NM_181274	1834	3'
8.90589	11	chr8:90590567-90590628	Zfp423	AY147407	12405	Intronic	Zfp423	AY147407	73073	Intronic
9.12005	11	chr9:120051317-120051455	Mobp	NM_008614	26597	3'	Myrip	NM_144557	101383	intergenic
9.12255	11	chr9:122550648-122550715	Abhd5	NM_026179	320460	intergenic	D9Ertd402e	NM_001013405	103615	intergenic
9.24291	11	chr9:24292507-24292522	Dpy19l1	NM_172920	54193	5'	1700009B20Rik	NM_173412	83076	5'
9.40623	11	chr9:40624875-40624876	AK038159	AK038159	51133	3'	Bsx	NM_178245	319	5'
9.43757	11	chr9:43758497-43758505	AK138823	AK138823	12537	5'	Thy1	NM_009382	38446	5'
9.4631	11	chr9:46311652-46311759	4931429L15Rik	NM_183104	240724	intergenic	Igsf4a	AK013911	969545	intergenic
9.54067	11	chr9:54069076-54069221	1700104A03Rik	NM_001033169	1768	Intronic	1700104A03Rik	NM_001033169	8994	Intronic
9.58638	11	chr9:58639963-58639976	AK010725	AK010725	100276	intergenic	Neo1	AK052439	32848	3'
9.61279	11	chr9:61282481-61282523	Tle3	AK031322	66080	3'	Rplp1	NM_018853	428786	intergenic
9.62945	11	chr9:62949224-62949268	Lbxcor1	AB185113	4229	5'	Map2k5	BC028260	12527	3'
9.94464	11	chr9:94465794-94465869	1190002N15Rik	AK162197	131797	intergenic	Slc9a9	NM_177909	13437	5'
10.1077	11	chr10:10771779-10771819	Grm1	BC067057	753	1st intron	Grm1	BC067057	638	1st intron
10.1119	11	chr10:11188676-11188724	Epm2a	NM_010146	40787	3'	Timm8a	BC094631	110745	intergenic
10.1191	11	chr10:119108423-119108469	Grip1	BC072632	250964	1st intron	Grip1	BC067398	114001	intergenic
10.2456	11	chr10:24559363-24559363	Enpp3	AK132256	33747	5'	Crsp3	AK028545	88	5'
10.4065	11	chr10:40650024-40650068	Wasf1	NM_031877	23064	3'	Gpr6	AK139367	108348	intergenic
10.6034	11	chr10:60338609-60338643	AK007277	AK007277	5137	5'	Pcbd1	NM_025273	146090	intergenic
10.6999	11	chr10:69993775-69993780	Phyhipl	BC037618	27458	1st intron	Phyhipl	BC037618	526	1st intron
10.8396	11	chr10:83957581-83957584	Ckap4	NM_175451	0	intragenic	Ckap4	NM_175451	0	intragenic
10.9025	11	chr10:90256824-90256899	E030041M21Rik	NM_029166	1008662	intergenic	Apaf1	AK220340	162254	intergenic
11.1011	11	chr11:101062324-101062360	D830013H23Rik	NM_176906	0	1st exon	D830013H23Rik	NM_176906	0	1st exon
11.1014	11	chr11:101418683-101418712	Tmem106a	NM_144830	11694	3'	Rdm1	NM_025654	25340	5'
11.1039	11	chr11:103869543-103869553	Arf2	NM_007477	68124	3'	Crhr1	NM_007762	79422	5'
11.1185	11	chr11:118475498-118475545	D11Bwg0517e	BC054403	49233	Intronic	D11Bwg0517e	BC054403	11216	Intronic
11.2303	11	chr11:23031693-23031782	4930430E16Rik	BC026495	108007	intergenic	Xpo1	BC034710	124793	intergenic
11.3369	11	chr11:33687602-33687644	Kcnip1	AK045948	136051	1st intron	Kcnip1	AY171234	55505	1st intron
11.5419	11	chr11:54187342-54187372	Acsl6	NM_144823	2103	Intronic	Acsl6	NM_144823	1240	Intronic
11.5909	11	chr11:59093260-59093451	Wnt3a	NM_009522	1779	1st intron	Wnt3a	NM_009522	13415	1st intron
11.5913	11	chr11:5916441-5916554	Camk2b	BC080273	985	Intronic	Camk2b	BC080273	12371	Intronic
11.7877	11	chr11:78768755-78768790	Nos2	AF065919	1319	Intronic	Nos2	AF065919	224	Intronic
11.8029	11	chr11:80293154-80293231	Psmd11	NM_178616	5032	3'	Cdk5r1	NM_009871	47	5'
11.8218	11	chr11:82187928-82187955	Ccl1	M23501	191934	intergenic	Gm644	NM_023438	17152	5'
11.8454	11	chr11:84540548-84540701	Lhx1	NM_008498	198895	intergenic	Mrm1	NM_145433	88632	3'
11.8707	11	chr11:87070800-87070804	Ppm1e	NM_177167	5557	1st intron	Ppm1e	AK053696	101957	intergenic
11.9813	11	chr11:98130338-98130377	Crkrs	NM_026952	67564	3'	Neurod2	BC058965	12276	3'
12.1007	11	chr12:100669215-100669283	Calm1	NM_009790	58393	3'	AK147460	AK147460	8408	5'
12.1132	11	chr12:113246135-113246181	AI450948	NM_001033476	22710	5'	BC022687	NM_145450	10623	5'
12.2942	11	chr12:29417404-29417451	Tssc1	NM_201357	2380	Intronic	Tssc1	NM_201357	16311	Intronic
12.7386	11	chr12:73858625-73858652	Six6os1	NM_029444	22035	5'	Six6	NM_011384	143	5'
12.9944	11	chr12:99442836-99442859	Ttc8	NM_029553	58565	3'	Ches1	BC029185	148286	intergenic
13.4272	11	chr13:42722713-42722729	Phactr1	NM_198419	1899	Intronic	Phactr1	NM_198419	244866	Intronic
13.5395	11	chr13:53955724-53955767	Msx2	NM_013601	475137	intergenic	Drd1a	NM_010076	105529	intergenic
13.5488	11	chr13:54886339-54886370	Tspan17	NM_028841	79964	3'	Unc5a	BC058084	72677	5'
14.2848	11	chr14:28484210-28484265	Cacna2d3	NM_009785	122629	Intronic	Cacna2d3	NM_009785	63644	Intronic
14.5798	11	chr14:57980144-57980146	Fgf9	NM_013518	916385	intergenic	1700129C05Rik	NM_026461	107003	intergenic
14.6401	11	chr14:64013057-64013072	Extl3	BC065073	1995	Intronic	Extl3	BC065073	29	Intronic
14.7593	11	chr14:75929606-75929642	D230005D02Rik	NM_172813	38427	1st intron	D230005D02Rik	NM_172813	73336	1st intron
15.9863	11	chr15:98627781-98627781	Wnt1	AK141669	5918	3'	AK158894	AK158894	4036	3'
17.7218	11	chr17:72181827-72181834	Alk	NM_007439	70975	Intronic	Alk	NM_007439	83583	Intronic
18.6417	11	chr18:64168078-64168125	AK154451	AK154451	52978	3'	St8sia3	NM_009182	222654	intergenic
19.3766	11	chr19:3767736-3767736	Suv420h1	NM_144871	6	1st intron	Suv420h1	NM_144871	284	1st intron
19.4395	11	chr19:43956293-43956298	Dnmbp	AY383729	0	intragenic	Dnmbp	AY383729	0	intragenic
X.7768823	11	chrX:7771458-7771463	Ssxb3	NM_198898	25255	5'	Ssx9	NM_199063	133929	intergenic
Y.1201568	11	chrY:1204080-1204178	Usp9y	NM_148943	407904	intergenic	Zfy2	NM_009571	186953	intergenic
Y.1393971	11	chrY:1397834-1397913	Zfy2	NM_009571	2954	Intronic	Zfy2	NM_009571	3168	Intronic
Y.1835770	11	chrY:1848110-1848117	Zfy2	NM_009571	392835	intergenic	BC111527	BC111527	99226	5'
Y.270302	11	chrY:288315-288331	Jarid1d	NM_011419	8069	3'	Eif2s3y	AK012186	58713	5'
Y.744154	11	chrY:755812-755858	Usp9y	NM_148943	6870	Intronic	Usp9y	NM_148943	12779	Intronic
1.1688	12	chr1:168801264-168801349	4831428F09Rik	NM_172844	282786	intergenic	C030014K22Rik	NM_175461	36842	5'
1.16891	12	chr1:168916362-168916362	C030014K22Rik	BC066094	220	Intronic	C030014K22Rik	BC066094	8289	Intronic
1.17922	12	chr1:179219652-179219698	Akt3	NM_011785	134233	intergenic	Zfp238	NM_001012330	61659	5'
1.50124	12	chr1:5013027-5013042	Rgs20	AK078208	2161	5'	Atp6v1h	NM_133826	60200	5'
1.63111	12	chr1:63111342-63111343	Ndufs1	NM_145518	357	5'	Eef1b2	NM_018796	63	5'
1.75362	12	chr1:75362705-75362721	D1Bwg1363e	NM_001001566	164	5'	A230078I05Rik	NM_177056	13	5'
2.1041	12	chr2:104100045-104100103	A930018P22Rik	NM_026634	174489	intergenic	Hipk3	NM_010434	130528	intergenic
2.15715	12	chr2:157148506-157148521	Src	NM_009271	1305	Intronic	Src	NM_009271	3	Intronic
2.16358	12	chr2:163581052-163581082	Rims4	NM_183023	10394	1st intron	Rims4	NM_183023	28959	1st intron
2.16485	12	chr2:164851633-164851748	Cdh22	NM_174988	3116	Intronic	Cdh22	NM_174988	10136	Intronic
2.18034	12	chr2:180347311-180347326	AK018689	AK018689	77178	3'	Slco4a1	NM_148933	43066	5'
2.18124	12	chr2:181243611-181243674	Stmn3	NM_009133	0	1st exon	Stmn3	NM_009133	0	1st exon
2.18169	12	chr2:181694135-181694269	Oprl1	AK043275	43822	3'	Myt1	NM_008665	2244	5'
2.28014	12	chr2:28017158-28017205	Olfm1	NM_001038613	1710	1st intron	Olfm1	NM_019498	10515	5'
2.79255	12	chr2:79255216-79255236	Neurod1	NM_010894	0	intragenic	Neurod1	NM_010894	0	intragenic
2.92868	12	chr2:92872613-92872690	4631405J19Rik	BC100298	38369	3'	Trp53i11	NM_001025246	115770	intergenic
3.15276	12	chr3:152758851-152758859	St6galnac5	NM_012028	0	intragenic	St6galnac5	NM_012028	0	intragenic
3.19886	12	chr3:19886770-19886847	Crh	NM_205769	167	1st intron	Crh	NM_205769	508	1st intron
4.12036	12	chr4:120364127-120364137	AK136831	AK136831	11375	1st intron	AK136831	AK136831	5978	1st intron
4.12413	12	chr4:124135730-124135803	AK013916	AK013916	22660	5'	Utp11l	NM_026031	45302	3'
4.12438	12	chr4:124384818-124384876	Epha10	NM_177671	563	1st intron	Epha10	NM_177671	1356	1st intron
4.13695	12	chr4:136948320-136948340	AK133251	AK133251	19931	3'	BC052065	BC052065	5458	5'
4.14744	12	chr4:147438708-147438722	Srm	NM_009272	297	3'	Masp2	NM_001003893	7629	5'
4.15001	12	chr4:150005881-150005920	Vamp3	NM_009498	104147	intergenic	AK144150	AK144150	618351	intergenic
4.15112	12	chr4:151125598-151125611	Gpr153	NM_178406	0	intragenic	Gpr153	NM_178406	0	intragenic
4.15127	12	chr4:151268348-151268408	Kcnab2	NM_010598	11718	Intronic	Kcnab2	NM_010598	10202	Intronic
4.1522	12	chr4:152201441-152201500	Gm833	NM_001033414	656748	intergenic	BC049688	BC049688	599089	intergenic
4.15248	12	chr4:152481949-152481969	Gm833	NM_001033414	937237	intergenic	BC049688	BC049688	318600	intergenic
4.15291	12	chr4:152914961-152914987	Trp73	BC066045	3411	Intronic	Trp73	BC066045	10153	Intronic
4.32929	12	chr4:32929858-32929870	Bach2	NM_007521	20052	3'	Casp8ap2	NM_011997	14260	5'
4.41734	12	chr4:41734826-41734893	AK009522	AK009522	21774	1st intron	AK009522	AK009522	23020	1st intron
4.44724	12	chr4:44725469-44725576	Melk	NM_010790	339747	intergenic	Zcchc7	NM_177027	52144	5'
4.61743	12	chr4:61743547-61743572	Zfp37	X89264	48752	5'	Slc31a2	NM_025286	29247	5'
4.82777	12	chr4:82778057-82778154	1810054D07Rik	AK049108	8912	1st intron	1810054D07Rik	AK049108	17195	1st intron
5.10012	12	chr5:100124577-100124587	AK015871	AK015871	199246	intergenic	Hnrpd	BC011172	76725	3'
5.10039	12	chr5:100390432-100390461	BC062109	AK166646	27349	5'	BC062109	BC062109	9320	1st intron
5.10879	12	chr5:108789880-108789925	Cplx1	NM_007756	991	1st intron	Cplx1	NM_007756	287	1st intron
5.11485	12	chr5:114849132-114849144	BC057022	NM_001004180	19715	1st intron	BC057022	NM_001004180	6200	1st intron
5.11523	12	chr5:115230369-115230394	Tcf1	NM_009327	9167	1st intron	Tcf1	NM_009327	1135	1st intron
5.12864	12	chr5:128638214-128638270	C630028F04Rik	NM_172885	79662	1st intron	C630028F04Rik	NM_172885	108735	1st intron
5.1296	12	chr5:129602366-129602399	AK153762	AK153762	83077	3'	Sfrs8	NM_172276	213555	intergenic
5.13652	12	chr5:136525161-136525196	Aps	NM_018825	8165	1st intron	Aps	NM_018825	4076	1st intron
5.14838	12	chr5:148380514-148380518	C130038G02Rik	NM_001033601	112132	1st intron	C130038G02Rik	NM_001033601	6011	1st intron
5.37297	12	chr5:37298172-37298189	Wfs1	AK144561	20998	5'	Gababrbp	NM_178394	40983	5'
6.12046	12	chr6:120458389-120458412	Cecr6	NM_033567	0	1st exon	Cecr6	NM_033567	0	1st exon
6.31234	12	chr6:31237347-31237371	AB041803	NM_144555	88763	5'	Mkln1	AK164822	91635	5'
6.33053	12	chr6:33056469-33056561	Chchd3	AK145337	66157	5'	Exoc4	AK014499	122769	intergenic
6.39801	12	chr6:39801721-39801765	Mrps33	NM_010270	61200	5'	LOC434008	NM_001004182	238115	intergenic
6.84329	12	chr6:84330833-84330865	Dysf	AK131144	154132	intergenic	AK144571	AK144571	47749	3'
6.85477	12	chr6:85477196-85477216	Egr4	NM_020596	0	intragenic	Egr4	NM_020596	0	intragenic
7.10129	12	chr7:101293313-101293362	Centd2	NM_027180	6930	3'	Pde2a	NM_001008548	2191	5'
7.10564	12	chr7:105635834-105635859	Tpp1	NM_009906	9818	5'	Mrpl17	NM_025301	41755	3'
7.13792	12	chr7:137922454-137922492	Txnl2	NM_023140	615536	intergenic	Tcerg1l	NM_183289	174455	intergenic
7.15304	12	chr7:15306271-15306338	Slc8a2	BC080277	2429	Intronic	Slc8a2	BC080277	2557	Intronic
7.27897	12	chr7:27900875-27900907	Dyrk1b	NM_001037957	4838	3'	Cri2	NM_198425	75748	5'
7.34408	12	chr7:34411701-34411776	Chst8	NM_175140	26306	Intronic	Chst8	NM_175140	45082	Intronic
7.422	12	chr7:4223306-4223357	Syt5	NM_016908	73677	5'	Tmem86b	NM_023440	7796	3'
8.11483	12	chr8:114828017-114828110	Gabarapl2	BC026798	175	Intronic	Gabarapl2	BC026798	1110	Intronic
8.12677	12	chr8:126777578-126777590	BC036300	BC036300	31285	5'	Acta1	NM_009606	273	3'
8.19917	12	chr8:19919882-19919885	A430108E01Rik	AK033345	130920	intergenic	Defb51	AK136644	190574	intergenic
8.74599	12	chr8:74600680-74600698	Unc13a	NM_001029873	53	5'	AK087256	AK087256	3247	3'
9.10555	12	chr9:105552120-105552152	Atp2c1	AK136062	166717	intergenic	E330026B02Rik	NM_172927	80074	3'
9.40019	12	chr9:40020344-40020400	Scn3b	NM_178227	199	1st intron	Scn3b	NM_178227	165	1st intron
9.43448	12	chr9:43449743-43449753	Trim29	BC027353	362639	intergenic	Pvrl1	NM_021424	45821	5'
9.43665	12	chr9:43666211-43666236	Pvrl1	NM_021424	107774	intergenic	AK138823	AK138823	63734	3'
9.57266	12	chr9:57266340-57266360	Scamp5	NM_020270	189	5'	Rpp25	NM_133982	35887	5'
9.57856	12	chr9:57859197-57859215	4930535E21Rik	AK145264	2672	Intronic	Stra6	AK083120	2717	5'
11.1039	12	chr11:103931017-103931038	Arf2	NM_007477	129603	intergenic	Crhr1	NM_007762	17943	5'
11.1077	12	chr11:107736371-107736449	Cacng5	NM_080644	8958	5'	Prkca	BC096493	17846	3'
11.2273	12	chr11:22726543-22726563	Tmem17	NM_153596	307320	intergenic	B3gnt1	NM_016888	8193	3'
11.3055	12	chr11:3064796-3064823	AK133558	AK133558	93	Intronic	AK133558	AK133558	768	Intronic
11.4358	12	chr11:4361329-4361366	AK015939	AK015939	20241	5'	Mtmr3	BC081544	21206	3'
11.9697	12	chr11:96968368-96968386	Tbkbp1	NM_198100	2575	5'	Kpnb1	BC055115	9243	3'
12.1113	12	chr12:111331220-111331285	2810452K22Rik	AK007812	3631	Intronic	2810452K22Rik	AK007812	443	Intronic
12.3214	12	chr12:32145305-32145353	Slc26a4	NM_011867	51	1st intron	Slc26a4	NM_011867	379	1st intron
12.8124	12	chr12:8126009-8126020	AK147540	AK147540	83171	3'	1110057K04Rik	NM_172401	108117	intergenic
13.4884	12	chr13:48844465-48844541	Phf2	NM_011078	448	Intronic	Phf2	NM_011078	2642	Intronic
14.5444	12	chr14:54445733-54445806	BC036313	NM_001024645	415	1st intron	BC036313	NM_001024645	1172	1st intron
14.6708	12	chr14:67079025-67079079	Nef3	AK051696	879	5'	Adam7	NM_007402	371615	intergenic
15.7378	12	chr15:73784863-73784889	Gm628	NM_001033365	117950	intergenic	Bai1	NM_174991	559061	intergenic
15.8191	12	chr15:81907272-81907293	Nhp2l1	NM_011482	32429	5'	AY270177	AY270177	2435	5'
15.8676	12	chr15:86760594-86760710	Tbc1d22a	NM_145476	434383	intergenic	AW049604	NM_134096	692342	intergenic
15.9535	12	chr15:95357008-95357031	Nell2	AK039790	280	5'	AK037810	AK037810	258869	intergenic
17.8292	12	chr17:82919329-82919375	Slc8a1	U70033	1272649	intergenic	AW548124	NM_134117	204274	intergenic
17.91	12	chr17:91001215-91001243	Nrxn1	AB093249	108	5'	Nanp	BC083086	143863	intergenic
18.382	12	chr18:38201486-38201492	Centd3	AK220486	77948	5'	Pcdh1	BC040402	121178	intergenic
18.7742	12	chr18:77419865-77419899	St8sia5	X98014	3669	Intronic	St8sia5	NM_153124	17359	1st intron
19.4043	12	chr19:40428193-40428217	Sorbs1	AK122487	1277	Intronic	Sorbs1	AK122487	7625	Intronic
Y.1139403	12	chrY:1149257-1149272	Usp9y	NM_148943	353039	intergenic	Zfy2	NM_009571	241818	intergenic
Y.990512	12	chrY:998662-998715	Usp9y	NM_148943	202463	intergenic	Zfy2	NM_009571	392394	intergenic
1.1713	13	chr1:17130851-17130864	Gdap1	NM_010267	55	1st intron	Gdap1	NM_010267	1291	1st intron
2.14314	13	chr2:143143336-143143377	Otor	NM_020595	370218	intergenic	Pcsk2	NM_008792	94262	5'
2.15827	13	chr2:158276279-158276397	BC054059	NM_145635	76699	3'	Slc32a1	BC052020	25868	5'
2.17201	13	chr2:172012303-172012306	Mc3r	NM_008561	69985	3'	2010011I20Rik	BC057642	24516	5'
2.18082	13	chr2:180823961-180823969	AK133152	AK133152	69927	5'	Ythdf1	NM_173761	9819	3'
2.92198	13	chr2:92202223-92202294	Mapk8ip1	AF003115	156	5'	Cry2	NM_009963	2227	3'
3.66062	13	chr3:66062426-66062437	Ccnl1	NM_019937	16283	5'	Veph1	NM_028357	82133	3'
3.87118	13	chr3:87119435-87119456	Cd1d1	NM_007639	34181	5'	Kirrel1	NM_130867	49292	3'
[truncated: 461 more rows]

## Sheet: NS5 ChIP-PET 5+
ChIP-PET ID	PET Overlap Count	Binding Location	Nearest Left Target Gene	Nearest Left Target ID	Nearest Left Target Distance	Annotation to Nearest Left Target	Nearest Right Target Gene	Nearest Right Target ID	Nearest Right Target Distance	Annotation to Nearest Right Target
1.12667	5	chr1:126673200-126673238	Dpp10	NM_199021	800121	intergenic	Actr3	NM_023735	547231	intergenic
1.13648	5	chr1:136481329-136481418	Syt2	NM_009307	964	Intronic	Syt2	NM_009307	75871	Intronic
1.13745	5	chr1:137450833-137451079	Nav1	AK158038	26641	1st intron	Nav1	AK158038	53372	1st intron
1.17733	5	chr1:177328731-177328779	Rgs7	NM_011880	904	1st intron	Rgs7	NM_011880	179	1st intron
1.36604	5	chr1:3660910-3660936	Xkr4	NM_001011874	0	1st exon	Xkr4	NM_001011874	0	1st exon
1.74791	5	chr1:74791397-74791519	Cdk5r2	NM_009872	2044	3'	Fev	NM_153111	23256	3'
1.82176	5	chr1:82177055-82177412	Irs1	NM_010570	6793	5'	4930418P06Rik	NM_029777	42108	5'
1.84958	5	chr1:84959935-84960219	Slc16a14	BC023456	145969	intergenic	A530032D15Rik	NM_213615	7353	3'
1.92837	5	chr1:9283815-9283931	Sntg1	AK038698	0	1st exon	Sntg1	AK083241	0	1st exon
2.15867	5	chr2:158677270-158677364	Dhx35	NM_145742	127663	intergenic	Gm826	NM_001033411	1325523	intergenic
2.16358	5	chr2:163581034-163581054	Rims4	NM_183023	10371	1st intron	Rims4	NM_183023	28982	1st intron
2.17193	5	chr2:171932399-171932431	Cbln4	NM_175631	197744	intergenic	Mc3r	NM_008561	7280	5'
2.17963	5	chr2:179627830-179627999	Cdh4	NM_009867	253695	Intronic	Cdh4	NM_009867	81746	Intronic
2.18124	5	chr2:181243610-181243671	Stmn3	NM_009133	0	1st exon	Stmn3	NM_009133	0	1st exon
2.2913	5	chr2:29132192-29132268	Als4	NM_198033	127750	intergenic	Crsp8	BC016537	36596	5'
2.79261	5	chr2:79261615-79261697	Neurod1	NM_010894	4181	5'	Ssfa2	AK169543	174606	intergenic
2.90979	5	chr2:90980745-90980878	Madd	AK036347	651	1st intron	Madd	AK036347	2822	1st intron
2.9219	5	chr2:92190746-92190763	Mapk8ip1	NM_011162	635	Intronic	Mapk8ip1	NM_011162	1119	Intronic
2.92472	5	chr2:92472689-92472775	Chst1	NM_023850	56643	3'	Syt13	NM_030725	243206	intergenic
3.13695	5	chr3:136952281-136952282	Ppp3ca	BC096652	79017	3'	AK145825	AK145825	326194	intergenic
3.1532	5	chr3:153204924-153205020	St6galnac3	NM_011372	60861	Intronic	St6galnac3	NM_011372	143874	Intronic
3.15475	5	chr3:154755102-154755207	Tnni3k	NM_177066	27009	Intronic	Tnni3k	NM_177066	7618	Intronic
3.55099	5	chr3:55099816-55099821	6030405A18Rik	NM_177854	96002	5'	Ccna1	NM_007628	33584	3'
3.76	5	chr3:76000897-76000914	Golph4	NM_175193	3329	1st intron	Golph4	NM_175193	41132	1st intron
3.82498	5	chr3:82498515-82498564	Gucy1a3	NM_021896	267539	intergenic	Npy2r	BC104733	127336	intergenic
3.85231	5	chr3:85231676-85231711	Fbxw7	NM_080428	168143	intergenic	Pet112l	AK166231	428351	intergenic
4.11822	5	chr4:118219776-118219857	Olfr62	BC104295	55417	3'	Olfr1340	NM_146304	4363	5'
4.13952	5	chr4:139521554-139521770	Igsf21	NM_198610	2802	5'	AK030056	AK030056	71068	3'
4.14685	5	chr4:146845787-146845789	Nppa	NM_008725	0	intragenic	Nppa	NM_008725	0	intragenic
4.15127	5	chr4:151268227-151268570	Kcnab2	NM_010598	11738	Intronic	Kcnab2	NM_010598	10182	Intronic
4.42965	5	chr4:42966322-42966407	N28178	AK122428	1116	3'	Dnajb5	NM_019874	7828	5'
5.10669	5	chr5:106689212-106689237	Zfp326	NM_018759	533110	intergenic	E130309B19Rik	NM_001005477	3601	3'
5.11485	5	chr5:114849074-114849239	BC057022	NM_001004180	19733	1st intron	BC057022	NM_001004180	6182	1st intron
5.12378	5	chr5:123785127-123785194	Diablo	NM_023232	378	5'	Vps33a	NM_029929	4559	3'
5.14031	5	chr5:140308017-140308108	Mad1l1	AF083813	46314	Intronic	Mad1l1	AF083813	10224	Intronic
5.14976	5	chr5:149756799-149756977	AK087319	AK087319	17530	3'	4930434E21Rik	NM_029440	40168	5'
5.23865	5	chr5:23867518-23867526	Kcnh2	AF012868	5853	5'	Nos3	NM_008713	7360	5'
5.27383	5	chr5:27383382-27383532	B930011P16Rik	NM_207282	540	3'	Dpp6	BC048383	209412	intergenic
5.28172	5	chr5:28172484-28172643	Paxip1	NM_018878	50437	5'	Htr5a	NM_008314	169	5'
5.29286	5	chr5:29285903-29285979	Shh	NM_009170	488066	intergenic	Rnf32	NM_021470	240922	intergenic
5.38766	5	chr5:38766469-38766578	Slc2a9	NM_001012363	781	1st intron	Slc2a9	AK156740	1763	1st intron
5.71407	5	chr5:71407243-71407261	Gabra2	NM_008066	32268	5'	4930503B16Rik	NM_030052	314705	intergenic
5.7834	5	chr5:78340416-78340569	Spink2	NM_183284	54264	5'	Rest	NM_011263	2222	5'
6.1192	5	chr6:119198848-119198909	Dcp1b	NM_001033379	13055	3'	5730412N02Rik	NM_001033382	3265	5'
6.12046	5	chr6:120458742-120458797	Cecr6	NM_033567	0	1st exon	Cecr6	NM_033567	0	1st exon
6.31814	5	chr6:31814079-31814089	Podxl	NM_013723	320010	intergenic	1700012A03Rik	NM_029587	166365	intergenic
6.85461	5	chr6:85464205-85464372	Fbxo41	NM_001001160	13767	1st intron	Fbxo41	NM_001001160	4071	1st intron
6.88941	5	chr6:88942818-88942932	Gpr175	BC028977	65019	3'	4933427D06Rik	NM_175017	118944	intergenic
6.90817	5	chr6:90817977-90818286	Iqsec1	NM_182784	190345	intergenic	Nup210	BC052468	160441	intergenic
6.91805	5	chr6:91805066-91805265	Grip2	NM_001033353	76463	5'	C130022K22Rik	BC051147	38396	5'
7.1347	5	chr7:134702587-134702765	AK016590	AK016590	522347	intergenic	AK140373	AK140373	34700	3'
7.33251	5	chr7:33252266-33252379	Abpd	NM_001009952	177243	intergenic	Abpz	NM_177446	193629	intergenic
7.42228	5	chr7:4223232-4223302	Syt5	NM_016908	73613	5'	Tmem86b	NM_023440	7860	3'
7.44299	5	chr7:44300338-44300445	Syt3	NM_016663	32320	3'	0610012D14Rik	NM_026690	33084	5'
7.49778	5	chr7:49778479-49778680	Slc6a5	AY147186	177	1st intron	Slc6a5	NM_148931	209	5'
7.74895	5	chr7:74895691-74895810	AK135124	AK135124	465518	intergenic	Sv2b	BC060224	92657	3'
7.76397	5	chr7:76397922-76398006	D430020F16	NM_172902	79458	Intronic	D430020F16	NM_172902	64916	Intronic
7.79374	5	chr7:79375776-79375976	AK139984	AK139984	33827	3'	Rhcg	NM_019799	91004	3'
7.99522	5	chr7:99522929-99523218	AK141001	AK141001	19857	3'	Slco2b1	NM_175316	8812	3'
8.12214	5	chr8:122144734-122144833	Cdh13	NM_019707	16363	Intronic	Cdh13	NM_019707	29778	Intronic
8.1777	5	chr8:17773378-17773458	Csmd1	NM_053171	238160	intergenic	Mcph1	NM_173189	821730	intergenic
8.30226	5	chr8:30226516-30226645	Unc5d	NM_153135	1522	Intronic	Unc5d	NM_153135	79	Intronic
8.334	5	chr8:33400647-33400737	AK141037	AK141037	16366	5'	AK170314	AK170314	12225	Intronic
8.72017	5	chr8:72017559-72017677	Slc18a1	NM_153054	11366	1st intron	Atp6v1b2	NM_007509	153	5'
8.96359	5	chr8:96359059-96359177	Ces1	NM_021456	132796	intergenic	AK007235	AK007235	14610	5'
8.97917	5	chr8:97917705-97917713	AK158130	AK158130	5068	3'	Gpr97	NM_173036	4776	Intronic
9.10513	5	chr9:105130642-105130705	Nek11	NM_172461	28149	Intronic	Nek11	NM_172461	15057	Intronic
9.34691	5	chr9:34691641-34691657	Kirrel3	BC063072	2717	Intronic	Kirrel3	BC063072	2390	Intronic
9.44633	5	chr9:44633645-44634047	BC021608	NM_138951	79900	5'	Atp5l	NM_013795	30421	3'
9.49781	5	chr9:49781420-49781500	Ncam1	NM_010875	230340	intergenic	1600029D21Rik	AK002767	465295	intergenic
9.5071	5	chr9:50710436-50710479	Snf1lk2	AK028526	22650	Intronic	Snf1lk2	AK028526	37379	Intronic
9.57266	5	chr9:57266332-57266363	Scamp5	NM_020270	186	5'	Rpp25	NM_133982	35890	5'
9.743	5	chr9:74300159-74300316	Wdr72	AK052055	263569	intergenic	Onecut1	NM_008262	348285	intergenic
9.9983	5	chr9:99833030-99833215	BC100555	BC100555	147600	intergenic	Fndc6	NM_001033543	433949	intergenic
10.2577	5	chr10:25771758-25771872	C030003D03Rik	AK021041	2952	3'	Gm623	NM_001013766	147306	intergenic
10.764	5	chr10:76402023-76402221	Pcbp3	AK034811	65750	1st intron	Pcbp3	AK034811	3340	1st intron
10.7729	5	chr10:77289546-77289646	C330046G03Rik	AK082868	0	intragenic	C330046G03Rik	AK082868	0	intragenic
10.8702	5	chr10:87016608-87016619	Pah	NM_008777	2683	3'	BC028536	BC028536	239573	intergenic
11.1	5	chr11:100019798-100019875	Krt1-14	BC011074	337	Intronic	Krt1-14	BC011074	208	Intronic
11.1117	5	chr11:111709899-111709953	Kcnj2	NM_008425	818185	intergenic	BC038907	BC038907	770089	intergenic
11.1152	5	chr11:115152305-115152380	Otop3	AB087505	1350	1st intron	Otop3	AB087505	3064	1st intron
11.1185	5	chr11:118501724-118501817	D11Bwg0517e	AK160816	14927	Intronic	D11Bwg0517e	AK160816	125596	Intronic
11.1187	5	chr11:118743295-118743401	D11Bwg0517e	BC054403	15661	5'	Enpp7	AK144474	60926	5'
11.3046	5	chr11:3046962-3046991	BC046305	BC046305	681	Intronic	BC046305	BC046305	6457	Intronic
11.3075	5	chr11:3077566-3077610	BC046305	BC046305	64	Intronic	BC046305	BC046305	1810	Intronic
11.3079	5	chr11:3079244-3079316	BC046305	BC046305	1756	Intronic	BC046305	BC046305	118	Intronic
11.3084	5	chr11:3085193-3085205	BC046305	BC046305	5689	Intronic	BC046305	BC046305	867	Intronic
11.3093	5	chr11:3094231-3094253	BC046305	BC046305	828	5'	Eif4enif1	AK041598	8151	5'
11.3262	5	chr11:32618440-32618755	Fbxw11	AK149139	6600	Intronic	Fbxw11	AK149139	1873	Intronic
11.3279	5	chr11:32789493-32789552	AK005748	AK005748	64949	5'	Fgf18	AK078245	227915	intergenic
11.5916	5	chr11:5916394-5916603	Camk2b	BC080273	986	Intronic	Camk2b	BC080273	12370	Intronic
11.594	5	chr11:59400940-59400996	Olfr222	NM_001011789	13035	5'	AA536749	NM_201245	77757	5'
11.7317	5	chr11:73170396-73170483	AK133348	AK133348	0	intragenic	AK133348	AK133348	0	intragenic
11.8013	5	chr11:80128821-80128972	Rhbdl4	NM_139228	10014	Intronic	Rhbdl4	NM_139228	6855	Intronic
11.8213	5	chr11:82129405-82129569	Ccl1	M23501	133480	intergenic	Gm644	NM_023438	75606	5'
11.8233	5	chr11:82331126-82331169	Gm644	NM_023438	68625	3'	AY512914	AY512914	118399	intergenic
11.8774	5	chr11:87737293-87737400	Epx	NM_007946	45620	5'	Dynll2	NM_026556	58380	3'
11.9697	5	chr11:96968346-96968395	Tbkbp1	NM_198100	2568	5'	Kpnb1	BC055115	9250	3'
12.1121	5	chr12:112127067-112127082	6720458F09Rik	NM_177374	304	1st intron	6720458F09Rik	NM_177374	1534	1st intron
12.5137	5	chr12:5137358-5137483	BC065168	BC065168	8585	Intronic	BC065168	BC065168	26009	Intronic
12.799	5	chr12:79903006-79903130	6330442E10Rik	NM_178745	6287	1st intron	6330442E10Rik	NM_178745	22743	1st intron
12.871	5	chr12:87102337-87102461	1700019E19Rik	BC038915	50838	3'	1700020O03Rik	AK031712	28577	5'
13.5489	5	chr13:54886330-54886418	Tspan17	NM_028841	79984	3'	Unc5a	BC058084	72657	5'
13.5495	5	chr13:54955136-54955266	Tspan17	NM_028841	148811	intergenic	Unc5a	BC058084	3830	5'
13.5867	5	chr13:58673150-58673177	Slc28a3	BC010472	52675	5'	Ntrk2	NM_008745	143054	intergenic
13.7036	5	chr13:70363610-70363837	D13Wsu50e	NM_138596	80257	3'	BC026613	BC026613	692343	intergenic
13.8316	5	chr13:8316203-8316276	Adarb2	BC059822	113673	1st intron	Adarb2	BC059822	242109	1st intron
14.313	5	chr14:31296744-31296806	Chat	NM_009891	1857	5'	AK048416	AK048416	102365	intergenic
14.6144	5	chr14:61435657-61435752	Gucy1b2	AK047129	25305	5'	Ddx26	NM_008715	194732	intergenic
14.7419	5	chr14:74189023-74189064	3110050K21Rik	NM_026083	110462	intergenic	Nurit	NM_026457	127987	intergenic
15.2877	5	chr15:28768274-28768331	AK085085	AK085085	956482	intergenic	Ctnnd2	AK140960	2096963	intergenic
15.6875	5	chr15:68749191-68749282	Rpl21	BC096572	609236	intergenic	Khdrbs3	NM_010158	8851	5'
15.7449	5	chr15:74486362-74486379	AK006048	AK006048	22854	5'	Arc	NM_018790	9967	3'
15.7854	5	chr15:78540469-78540489	BC094219	NM_183141	38484	1st intron	BC094219	NM_183141	4761	1st intron
15.8529	5	chr15:85293067-85293222	Atxn10	NM_016843	1542	3'	Wnt7b	NM_009528	70065	3'
15.8771	5	chr15:87714984-87715119	AW049604	NM_134096	127923	intergenic	Zdhhc25	NM_027306	713015	intergenic
16.1142	5	chr16:11424527-11424624	4933437K13Rik	NM_028964	0	intragenic	4933437K13Rik	NM_028964	0	intragenic
16.1227	5	chr16:12272871-12272902	AK080168	AK080168	428714	intergenic	Ercc4	NM_015769	750426	intergenic
16.3432	5	chr16:34320443-34320806	AK147314	AK147314	8768	1st intron	AK147314	AK147314	113035	1st intron
16.5678	5	chr16:5680338-5680544	5730409G15Rik	AK133590	509164	intergenic	A2bp1	BC053009	119671	intergenic
16.5805	5	chr16:5808541-5808603	A2bp1	NM_021477	7387	1st intron	A2bp1	NM_021477	280352	1st intron
16.6215	5	chr16:62150696-62150766	Epha6	NM_007938	1603228	intergenic	Nsun3	AK032127	523968	intergenic
16.9122	5	chr16:91220149-91220265	Olig1	NM_016968	59410	3'	Ifnar2	NM_010509	41549	5'
16.9127	5	chr16:9128825-9128921	AK163088	AK163088	360400	intergenic	Grin2a	NM_008170	362390	intergenic
16.9508	5	chr16:95081508-95081509	Kcnj6	NM_010606	31481	1st intron	Kcnj6	NM_010606	24475	1st intron
16.9682	5	chr16:96817007-96817054	Dscam	NM_031174	2842	Intronic	Dscam	NM_031174	3217	Intronic
17.1488	5	chr17:14884707-14884820	2410011O22Rik	NM_001034891	115579	intergenic	AK145347	AK145347	169203	intergenic
17.2574	5	chr17:25739788-25739849	AB093257	AB093257	87	Intronic	AB093257	AB093257	1554	Intronic
17.2909	5	chr17:29089109-29089231	Fgd2	NM_013710	1001	1st intron	Fgd2	NM_013710	1551	1st intron
17.3241	5	chr17:32413613-32413691	Cyp4f16	NM_024442	126675	intergenic	Cyp4f15	NM_134127	11315	5'
17.4638	5	chr17:46384250-46384422	Rds	AK044549	798	3'	Rds	NM_008938	2188	Intronic
17.5062	5	chr17:50624416-50624486	Tbc1d5	AK005461	16101	1st intron	Tbc1d5	AK005461	19576	1st intron
18.2564	5	chr18:25643577-25643747	Brunol4	BC052744	3122	Intronic	Brunol4	BC052744	547	Intronic
18.3625	5	chr18:36256413-36256457	Psd2	BC066026	115748	intergenic	Pura	NM_008989	150699	intergenic
18.7748	5	chr18:77478492-77478736	St8sia5	NM_153124	18846	3'	AK030047	AK030047	33584	5'
18.8255	5	chr18:82553470-82553476	Galr1	Y15004	12574	5'	Mbp	NM_010777	56076	5'
19.2342	5	chr19:23424570-23424620	Mamdc2	NM_174857	4051	Intronic	Mamdc2	NM_174857	1650	Intronic
19.3184	5	chr19:31840391-31840422	Prkg1	NM_001013833	9376	5'	AY566862	AY566862	94353	5'
19.4269	5	chr19:42690077-42690160	Loxl4	AK014331	24001	5'	AK154222	AK154222	89835	3'
19.4638	5	chr19:46380274-46380467	Psd	NM_028627	837	1st intron	Psd	NM_028627	23	1st intron
19.5423	5	chr19:54229268-54229331	Adra2a	NM_007417	127005	intergenic	Gpam	NM_008149	893684	intergenic
19.9559	5	chr19:9565497-9566232	Asrgl1	NM_025610	363253	intergenic	Incenp	NM_016692	373525	intergenic
X.119118527	5	chrX:119120506-119120522	Nap1l3	NM_138742	606185	intergenic	BC027572	BC027572	99987	5'
X.120310036	5	chrX:120311076-120311093	BC027572	BC027572	1050849	intergenic	4932411N23Rik	NM_177705	1968971	intergenic
X.156718850	5	chrX:156719774-156719865	Scml2	AK040521	118762	intergenic	Rai2	NM_198409	341911	intergenic
X.96022247	5	chrX:96022379-96022466	Pja1	BC037616	349056	intergenic	Eda	NM_010099	155901	intergenic
Y.1216981	5	chrY:1219790-1219813	Usp9y	NM_148943	423576	intergenic	Zfy2	NM_009571	171281	intergenic
Y.1280946	5	chrY:1281105-1281177	Usp9y	NM_148943	484916	intergenic	Zfy2	NM_009571	109941	intergenic
Y.1330189	5	chrY:1330689-1330713	Usp9y	NM_148943	534476	intergenic	Zfy2	NM_009571	60381	3'
Y.1503522	5	chrY:1508235-1508286	Zfy2	NM_009571	52982	5'	BC111527	BC111527	439079	intergenic
Y.1816387	5	chrY:1819481-1819524	Zfy2	NM_009571	364224	intergenic	BC111527	BC111527	127837	intergenic
Y.1821356	5	chrY:1823407-1823708	Zfy2	NM_009571	368279	intergenic	BC111527	BC111527	123782	intergenic
Y.2033332	5	chrY:2035634-2036831	BC111527	BC111527	87704	3'	Rbmy1a1	Y15131	33810	3'
Y.299784	5	chrY:300655-300725	Jarid1d	NM_011419	20436	3'	Eif2s3y	AK012186	46346	5'
Y.31180	5	chrY:36794-36967	No annotation yet				Zfy1	NM_009570	24770	3'
Y.537919	5	chrY:541747-541776	Uty	AF057367	5805	Intronic	Uty	AF057367	19177	Intronic
Y.978381	5	chrY:981328-981464	Usp9y	NM_148943	185171	intergenic	Zfy2	NM_009571	409686	intergenic
Y.987316	5	chrY:995769-995949	Usp9y	NM_148943	199634	intergenic	Zfy2	NM_009571	395223	intergenic
1.1016	6	chr1:101602389-101602566	AK014872	AK014872	1262691	intergenic	Cdh20	NM_011800	4993887	intergenic
1.12216	6	chr1:122159559-122159600	Steap3	AY214462	58845	5'	C1ql2	NM_207233	8547	5'
1.12932	6	chr1:129324441-129324532	2610024A01Rik	NM_028135	1081	Intronic	2610024A01Rik	NM_028135	3242	Intronic
1.15941	6	chr1:159412107-159412139	Lztr2	NM_033354	7024	3'	6430517E21Rik	NM_207583	669823	intergenic
1.16896	6	chr1:168960414-168960479	C030014K22Rik	NM_175461	32764	3'	Uck2	NM_030724	102315	intergenic
1.19416	6	chr1:194158484-194158531	Kcnh1	NM_001038607	22864	Intronic	Hhat	BC008159	38927	3'
1.56783	6	chr1:56783623-56783720	Satb2	AK129270	7490	Intronic	Satb2	AK129270	6448	Intronic
1.74873	6	chr1:74873149-74873194	B230363K08Rik	NM_001039495	4365	5'	Ihh	BC046984	5353	3'
1.80635	6	chr1:80635242-80635339	AK172588	AK172588	107934	1st intron	AK172588	AK172588	2058	1st intron
2.12483	6	chr2:124827354-124827482	Myef2	AK048404	12351	5'	AK141570	AK141570	713	5'
2.13165	6	chr2:131649538-131649639	Prnd	NM_023043	2018	3'	Rassf2	NM_175445	34702	3'
2.15828	6	chr2:158276269-158276303	BC054059	NM_145635	76647	3'	Slc32a1	BC052020	25920	5'
2.16479	6	chr2:164794226-164794362	Cd40	NM_011611	31437	3'	Cdh22	NM_174988	8418	3'
2.18035	6	chr2:180347312-180347393	AK018689	AK018689	77212	3'	Slco4a1	NM_148933	43032	5'
2.18082	6	chr2:180823954-180824061	AK133152	AK133152	69969	5'	Ythdf1	NM_173761	9777	3'
2.7036	6	chr2:70360538-70360591	4933404M02Rik	NM_025744	36353	3'	Gad1	AK054554	2436	5'
2.9813	6	chr2:98130979-98131044	Lrrc4c	NM_178725	698508	intergenic	B230118H07Rik	NM_026592	3230607	intergenic
3.11842	6	chr3:118423541-118423652	AK170966	AK170966	562712	intergenic	AK051312	AK051312	3176	5'
3.2756	6	chr3:27561385-27561534	Tnfsf10	NM_009425	30722	3'	Ghsr	NM_177330	963	5'
3.70524	6	chr3:70524688-70524698	Gm414	NM_001018031	408061	intergenic	Slitrk3	NM_198864	2609356	intergenic
3.84883	6	chr3:8491272-8491407	Il7	NM_008371	894839	intergenic	Stmn2	NM_025285	1259	5'
3.88078	6	chr3:88079583-88079652	Bcan	NM_007529	48	Intronic	Bcan	NM_007529	420	Intronic
3.89243	6	chr3:89245246-89245292	Hcn3	NM_008227	6282	1st intron	Hcn3	NM_008227	441	1st intron
4.10961	6	chr4:109617480-109617549	Dmrta2	NM_172296	135898	intergenic	Elavl4	NM_010488	84154	3'
4.11523	6	chr4:115226715-115226898	Cyp4b1	NM_007823	81169	5'	4732418C07Rik	AK030011	8868	5'
4.11739	6	chr4:117391525-117391617	Dph2	NM_026344	1636	5'	Ipo13	NM_146152	852	3'
4.11968	6	chr4:119682432-119682519	Edn2	BC037042	17480	3'	Foxo6	NM_194060	82236	3'
4.15291	6	chr4:152914860-152914976	Trp73	BC066045	3355	Intronic	Trp73	BC066045	10209	Intronic
4.36074	6	chr4:36073829-36073838	Lrrn6c	NM_175516	39750	5'	Aco1	NM_007386	4258345	intergenic
4.4172	6	chr4:41721363-41721366	AK009522	AK009522	8279	1st intron	AK009522	AK009522	36515	1st intron
4.446	6	chr4:44599935-44599947	Melk	NM_010790	214166	intergenic	Zcchc7	NM_177027	177725	intergenic
5.10879	6	chr5:108789930-108789975	Cplx1	NM_007756	1041	1st intron	Cplx1	NM_007756	237	1st intron
5.1108	6	chr5:110798795-110798912	Galnt9	AK032568	13609	1st intron	Galnt9	AK032568	18887	1st intron
5.11306	6	chr5:113065068-113065103	AK016515	AK016515	7087	Intronic	AK016515	AK016515	3193	Intronic
5.11381	6	chr5:113814274-113814501	C530024P05Rik	NM_177292	0	intragenic	C530024P05Rik	NM_177292	0	intragenic
5.12133	6	chr5:121329535-121329609	Rph3a	NM_011286	59437	5'	Ptpn11	BC003980	61585	3'
5.35848	6	chr5:35848503-35848569	Cpz	NM_153107	6140	5'	2310079F23Rik	NM_030208	25661	3'
5.86666	6	chr5:86666957-86666993	Epha5	AK034289	1175032	intergenic	Cenpc1	NM_007683	419620	intergenic
5.94503	6	chr5:9452283-9452329	9330182L06Rik	NM_172706	747	Intronic	9330182L06Rik	NM_172706	592	Intronic
6.10361	6	chr6:103614908-103614945	Chl1	NM_007697	1824	Intronic	Chl1	NM_007697	335	Intronic
6.10372	6	chr6:103719875-103719894	Chl1	AK040765	3909	3'	Cntn6	NM_017383	738931	intergenic
6.12843	6	chr6:128435137-128435229	AK029950	AK029950	29868	Intronic	Ppih	NM_028677	3101	3'
6.13485	6	chr6:134853875-134853963	Gpr19	BC021648	441	Intronic	Gpr19	BC021648	8934	Intronic
6.48481	6	chr6:48482778-48482806	Atp6v0e2	NM_133764	11408	3'	BC027309	AK143222	1591	5'
6.89208	6	chr6:89208115-89208169	Gm839	NM_201356	26422	5'	Plxna1	NM_008881	76354	3'
7.1013	6	chr7:101296087-101296147	Pde2a	NM_001008548	301	1st intron	Pde2a	AK158560	28222	5'
7.10887	6	chr7:108873651-108873752	Ric3	NM_178780	24515	1st intron	Ric3	NM_178780	637	1st intron
7.10892	6	chr7:108920784-108920807	Ric3	NM_001038624	46294	5'	Lmo1	NM_057173	8951	3'
7.12873	6	chr7:128729393-128729418	Sec23ip	NM_001029982	154471	intergenic	Brwd2	AK170058	653659	intergenic
7.13968	6	chr7:139679137-139679171	AK029726	AK029726	144020	intergenic	BC056493	BC056493	12559	5'
7.1811	6	chr7:18110109-18110244	C530028I08Rik	NM_001033314	41250	5'	Nanos2	NM_194064	35868	5'
7.34924	6	chr7:34924347-34924373	AK149337	AK149337	260	5'	Gpatc1	NM_026181	60942	3'
8.34161	6	chr8:34161706-34161817	AK170314	AK170314	745772	intergenic	Wrn	BC060700	539856	intergenic
8.87344	6	chr8:87344827-87344944	Cacna1a	NM_007578	38837	1st intron	Cacna1a	NM_007578	6708	1st intron
9.28895	6	chr9:28895452-28895515	Hnt	AK140516	36516	Intronic	Hnt	AK140516	32983	Intronic
9.4002	6	chr9:40020310-40020458	Scn3b	NM_178227	211	1st intron	Scn3b	NM_178227	153	1st intron
9.43757	6	chr9:43758519-43758531	AK138823	AK138823	12561	5'	Thy1	NM_009382	38422	5'
9.69655	6	chr9:69655952-69656012	Foxb1	NM_022378	95991	5'	Bnip2	NM_016787	132681	intergenic
9.91257	6	chr9:91258026-91258096	Zic4	NM_009576	70808	3'	Plscr1	AF159593	795956	intergenic
10.1118	6	chr10:111827559-111827638	Kcnc2	NM_001025581	151084	Intronic	Kcnc2	NM_001025581	32118	Intronic
10.1267	6	chr10:126659196-126659217	Kif5a	NM_001039000	7978	1st intron	Kif5a	NM_001039000	6509	1st intron
10.3557	6	chr10:3557603-3557710	Oprm1	AF260306	0	intragenic	Oprm1	AK038389	0	1st exon
10.4523	6	chr10:45235418-45235551	Lin28b	AK133928	60674	5'	Hace1	AK156958	30817	5'
10.9025	6	chr10:90253409-90253564	E030041M21Rik	NM_029166	1005287	intergenic	Apaf1	AK220340	165629	intergenic
10.9026	6	chr10:90256876-90256981	E030041M21Rik	NM_029166	1008729	intergenic	Apaf1	AK220340	162187	intergenic
11.1156	6	chr11:115630061-115630351	Caskin2	NM_080643	524	5'	AK002758	AK002758	637	5'
11.305	6	chr11:3050873-3050893	BC046305	BC046305	4588	Intronic	BC046305	BC046305	2550	Intronic
11.3065	6	chr11:3066844-3066874	AK133558	AK133558	1178	Intronic	AK133558	AK133558	3729	Intronic
11.307	6	chr11:3072196-3072274	BC046305	BC046305	1528	Intronic	BC046305	BC046305	5193	Intronic
11.3087	6	chr11:3087594-3087630	BC046305	BC046305	199	Intronic	BC046305	BC046305	1330	Intronic
11.3092	6	chr11:3093044-3093112	BC046305	BC046305	4019	1st intron	BC046305	BC046305	283	1st intron
11.3369	6	chr11:33687530-33687576	Kcnip1	AK045948	135981	1st intron	Kcnip1	AY171234	55575	1st intron
11.3593	6	chr11:35933768-35933775	Odz2	NM_011856	11778	Intronic	Odz2	NM_011856	16369	Intronic
11.4663	6	chr11:4663870-4663986	Cabp7	NM_138948	17147	5'	Nf2	BC005442	1922	3'
11.5169	6	chr11:51687497-51687606	Phf15	NM_199299	8398	Intronic	Phf15	NM_199299	2476	Intronic
11.5415	6	chr11:54146613-54146742	Il3	NM_010556	35977	5'	Acsl6	NM_001033598	568	5'
11.5574	6	chr11:55741075-55741169	Glra1	AK078258	289501	intergenic	Nmur2	NM_153079	127289	intergenic
11.7831	6	chr11:78312271-78312370	A830091I15Rik	NM_172795	4940	1st intron	A830091I15Rik	NM_172795	862	1st intron
11.9814	6	chr11:98140168-98140200	Crkrs	NM_026952	77391	3'	Neurod2	BC058965	2449	3'
12.1094	6	chr12:109442689-109442769	Wars	BC046232	100809	intergenic	Wdr25	NM_177602	25878	5'
12.3367	6	chr12:33670087-33670167	1110049B09Rik	NM_001024478	2507	Intronic	1110049B09Rik	NM_001024478	1109	Intronic
12.3392	6	chr12:33923422-33923746	Atxn7l1	NM_001033436	12204	Intronic	Atxn7l1	NM_001033436	3582	Intronic
12.4187	6	chr12:41866590-41866688	Immp2l	NM_053122	245273	Intronic	Lrrn3	NM_010733	95451	3'
12.9281	6	chr12:92811256-92811270	Sel1h	NM_001039089	556549	intergenic	Flrt2	NM_201518	3276820	intergenic
13.1021	6	chr13:102133229-102133287	Slc30a5	NM_022885	199574	intergenic	Pik3r1	NM_001024955	647760	intergenic
13.5396	6	chr13:53955741-53955833	Msx2	NM_013601	475179	intergenic	Drd1a	NM_010076	105487	intergenic
13.5427	6	chr13:54270110-54270116	Hrh2	NM_001010973	38062	3'	Cplx2	NM_009946	110859	intergenic
13.5498	6	chr13:54980620-54980642	Unc5a	NM_153131	21278	1st intron	Unc5a	NM_153131	19869	1st intron
14.3378	6	chr14:33777459-33777588	Grid1	NM_008166	2394	Intronic	Grid1	NM_008166	78312	Intronic
14.3598	6	chr14:35979860-35979931	Lrrc22	NM_173418	0	intragenic	Lrrc22	NM_173418	0	intragenic
14.5093	6	chr14:50933805-50933844	Zfp219	BC052050	1815	1st intron	Zfp219	BC052050	3073	1st intron
14.5445	6	chr14:54445629-54445795	BC036313	NM_001024645	358	1st intron	BC036313	NM_001024645	1229	1st intron
14.6244	6	chr14:62443536-62443664	BC065085	BC094561	23989	3'	Tdh	NM_021480	2857	3'
14.7899	6	chr14:78991407-78991543	Olfm4	AK133536	234460	intergenic	Pcdh17	BC079850	4262113	intergenic
15.2506	6	chr15:25062765-25062900	Cdh12	NM_001008420	3528575	intergenic	9230109A22Rik	NM_177339	19421	3'
15.8815	6	chr15:88153060-88153198	AW049604	NM_134096	566001	intergenic	Zdhhc25	NM_027306	274937	intergenic
16.975	6	chr16:9750263-9750293	Grin2a	NM_008170	74740	1st intron	Grin2a	NM_008170	155418	1st intron
17.1115	6	chr17:11153214-11153219	Park2	AF250293	6147	Intronic	Park2	AF250293	124690	Intronic
17.6527	6	chr17:65269950-65270051	E130009J12Rik	AF338468	109373	Intronic	E130009J12Rik	AK135727	8736	3'
17.8771	6	chr17:87706891-87706895	Kcnk12	NM_199251	573	5'	Msh6	NM_010830	176515	intergenic
18.3159	6	chr18:31590201-31590264	Syt4	NM_009308	0	1st exon	Syt4	NM_009308	0	1st exon
18.7319	6	chr18:7320327-7320363	Irxl1	NM_177595	315591	intergenic	AK141108	AK141108	27615	3'
18.7473	6	chr18:74733556-74733718	Myo5b	NM_201600	27738	Intronic	Myo5b	NM_201600	8649	Intronic
18.813	6	chr18:81296339-81296402	Sall3	NM_178280	147733	intergenic	Galr1	Y15004	1231213	intergenic
19.2346	6	chr19:23463226-23463288	Mamdc2	NM_174857	17226	Intronic	Mamdc2	NM_174857	51418	Intronic
19.4515	6	chr19:45151392-45151560	Kazald1	NM_178929	18883	3'	Tlx1	NM_021901	52548	5'
19.6052	6	chr19:60523724-60523810	Prlhr	NM_201615	800	5'	2700078E11Rik	BC026363	58762	3'
X.71896323	6	chrX:71897606-71897914	Rab39b	NM_175122	66836	5'	Pls3	BC005459	140623	intergenic
Y.1132639	6	chrY:1133786-1133869	Usp9y	NM_148943	337602	intergenic	Zfy2	NM_009571	257255	intergenic
Y.1516319	6	chrY:1530732-1530781	Zfy2	NM_009571	75478	5'	BC111527	BC111527	416583	intergenic
Y.1614816	6	chrY:1615439-1615491	Zfy2	NM_009571	160187	intergenic	BC111527	BC111527	331874	intergenic
Y.2701764	6	chrY:2705034-2705105	Rbmy1a1	U36929	242534	intergenic	N.A.	N.A.	N.A.	N.A.
Y.2719924	6	chrY:2724464-2724483	Rbmy1a1	U36929	261938	intergenic	N.A.	N.A.	N.A.	N.A.
Y.337898	6	chrY:345703-345803	Jarid1d	NM_011419	65499	3'	Eif2s3y	AK012186	1283	5'
Y.734760	6	chrY:737219-738858	Usp9y	NM_148943	5779	Intronic	Usp9y	NM_148943	10821	Intronic
Y.749685	6	chrY:759743-760080	Usp9y	NM_148943	10946	Intronic	Usp9y	NM_148943	8703	Intronic
1.12222	7	chr1:122217881-122218165	C1ql2	NM_207233	47304	3'	Marco	NM_010766	84060	3'
1.13456	7	chr1:134561557-134561628	AK133041	AK133041	1220	3'	Nfasc	NM_182716	7623	1st intron
1.14787	7	chr1:147869267-147869306	Rgs18	NM_022881	1331647	intergenic	B830045N13Rik	NM_153539	388620	intergenic
1.1603	7	chr1:160300931-160300985	Astn1	AK164117	101416	1st intron	Astn1	AK164117	8092	1st intron
1.1688	7	chr1:168801239-168801334	4831428F09Rik	NM_172844	282766	intergenic	C030014K22Rik	NM_175461	36862	5'
1.16891	7	chr1:168916366-168916429	C030014K22Rik	BC066094	255	Intronic	C030014K22Rik	BC066094	8254	Intronic
1.17853	7	chr1:178533961-178533974	Pld5	NM_176916	421994	intergenic	AK172953	AK172953	36369	3'
1.34961	7	chr1:34962157-34962231	Plekhb2	AK166091	138071	intergenic	Hs6st1	BC052316	1050750	intergenic
1.93573	7	chr1:93573432-93573509	Asb1	NM_023046	183436	intergenic	Twist2	NM_007855	58411	5'
2.12722	7	chr2:127224042-127224099	Prom2	BC039212	749	Intronic	Prom2	BC039212	106	Intronic
2.15735	7	chr2:157354977-157355079	Blcap	NM_016916	97226	5'	Ctnnbl1	AK145147	73863	5'
2.16515	7	chr2:165148056-165148165	Slc13a3	NM_054055	8118	1st intron	Slc13a3	NM_054055	16144	1st intron
2.25223	7	chr2:25224458-25224567	Entpd2	NM_009849	1186	3'	Npdc1	NM_008721	578	5'
2.32566	7	chr2:32566486-32566540	AK018150	AK018150	3488	5'	Sh2d3c	AK085885	245	Intronic
2.54246	7	chr2:54246617-54246639	Rprm	NM_023396	345690	intergenic	Galnt13	NM_173030	5143	5'
2.62987	7	chr2:62987057-62987119	Kcnh7	AK034003	1962	5'	Fign	BC059266	791109	intergenic
3.10709	7	chr3:107090689-107090711	Cd53	NM_007651	172592	intergenic	AI504432	NM_173787	76858	5'
3.1149	7	chr3:114896162-114896228	Col11a1	NM_007729	683904	intergenic	Olfm3	NM_153458	170	5'
3.68152	7	chr3:68152716-68152805	D230050A05	NM_177585	8238	3'	AK147301	AK147301	342950	intergenic
4.10337	7	chr4:103373714-103373740	BC051993	BC051993	256050	1st intron	BC051993	BC051993	76037	1st intron
4.1506	7	chr4:150603095-150603140	Vamp3	NM_009498	701364	intergenic	AK144150	AK144150	21134	3'
4.44455	7	chr4:44455832-44455851	Melk	NM_010790	70066	3'	Zcchc7	NM_177027	321825	intergenic
5.26866	7	chr5:26866414-26866415	AK016349	AK016349	42349	5'	Dpp6	NM_010075	281728	intergenic
5.30864	7	chr5:30864714-30864744	AK006670	AK006670	42312	5'	Kcnk3	AB013345	32	5'
5.37182	7	chr5:37184481-37184553	Ppp2r2c	NM_172994	27378	1st intron	Ppp2r2c	NM_172994	26698	1st intron
5.45817	7	chr5:45818125-45818207	9630031F12Rik	NM_021416	0	intragenic	9630031F12Rik	NM_021416	0	intragenic
5.68251	7	chr5:68253193-68253228	Atp8a1	NM_001038999	126644	intergenic	AY616753	NM_001018019	57758	5'
6.10738	7	chr6:107381716-107381741	Crbn	AK160219	615886	intergenic	Lrrn1	NM_008516	113832	intergenic
6.11325	7	chr6:113247894-113247966	1110061O04Rik	NM_026849	950	3'	Cpne9	NM_170673	152	5'
6.11514	7	chr6:115144614-115144643	Syn2	BC053427	43549	1st intron	Syn2	BC053427	57003	1st intron
6.11929	7	chr6:119286341-119286344	AI841794	NM_172492	0	intragenic	AI841794	NM_172492	0	intragenic
6.12262	7	chr6:122625335-122625364	Dppa3	NM_139218	29459	3'	AK010332 (Nanog)	AK010332 (Nanog)	47862	5'
6.13855	7	chr6:138547652-138547688	Lmo3	NM_207222	1506	5'	Igbp1b	NM_015777	73614	3'
6.30983	7	chr6:30983224-30983340	Tsga13	NM_054073	137546	intergenic	AB041803	NM_144555	112404	intergenic
6.31647	7	chr6:31647864-31647874	Podxl	NM_013723	153795	intergenic	1700012A03Rik	NM_029587	332580	intergenic
6.48066	7	chr6:48066658-48066674	AI894139	NM_178898	171783	intergenic	A930040G15Rik	AB041543	258532	intergenic
6.83893	7	chr6:83893202-83893338	Zfml	NM_008717	13123	1st intron	Zfml	NM_008717	1039	1st intron
7.12118	7	chr7:121182621-121182656	Otoa	NM_139310	228401	intergenic	AK122466	AK122466	250530	intergenic
7.12139	7	chr7:121387708-121387755	Otoa	NM_139310	433494	intergenic	AK122466	AK122466	45437	3'
7.12152	7	chr7:121521523-121521575	AK122466	AK122466	81362	5'	Scnn1g	NM_011326	4104	5'
7.24717	7	chr7:24717585-24717648	Atp1a3	NM_144921	2961	5'	Grik5	NM_008168	1018	3'
7.7837	7	chr7:78371429-78371567	Ntrk3	AF035399	20053	Intronic	Ntrk3	AF035399	18742	Intronic
7.81335	7	chr7:81337724-81337831	Ap3b2	NM_021492	67	Intronic	Ap3b2	NM_021492	176	Intronic
8.12462	7	chr8:124622477-124622538	Jph3	NM_020605	5413	1st intron	Jph3	NM_020605	16548	1st intron
8.12464	7	chr8:124647711-124647840	Jph3	NM_020605	7941	Intronic	Jph3	NM_020605	20474	Intronic
8.12622	7	chr8:126219005-126219038	Spire2	NM_172287	0	1st exon	Spire2	NM_172287	0	1st exon
8.13447	7	chr8:13448223-13448269	Grk1	NM_011881	30690	3'	Gas6	NM_019521	17105	3'
9.1051	7	chr9:105102334-105102357	Nek11	NM_172461	25634	Intronic	Nek11	NM_172461	17	Intronic
9.10555	7	chr9:105552034-105552179	Atp2c1	AK136062	166687	intergenic	E330026B02Rik	NM_172927	80104	3'
9.11956	7	chr9:119555620-119555663	Scn10a	NM_009134	12583	5'	Scn11a	AF118044	46822	3'
9.12185	7	chr9:121855469-121855510	C85492	NM_153540	10815	5'	Snrk	NM_133741	125109	intergenic
9.26476	7	chr9:26476999-26477149	2310005P05Rik	NM_026189	1123519	intergenic	B3gat1	AK082739	6178	5'
9.34587	7	chr9:34587520-34587660	Kirrel3	NM_026324	348867	1st intron	Kirrel3	NM_026324	73863	1st intron
9.4865	7	chr9:48650516-48650616	Zbtb16	NM_001033324	62702	5'	Htr3a	X72395	578	3'
9.53468	7	chr9:53468307-53468440	Rab39	NM_175562	0	1st exon	Rab39	NM_175562	0	1st exon
9.57401	7	chr9:57404276-57404323	Cplx3	NM_146223	0	1st exon	Cplx3	NM_146223	0	1st exon
10.1191	7	chr10:119108503-119108657	Grip1	BC072632	251098	1st intron	Grip1	BC067398	113867	intergenic
10.6031	7	chr10:60309954-60309998	Unc5b	NM_029770	83038	5'	AK007277	AK007277	13605	3'
10.728	7	chr10:7280201-7280251	Lrp11	BC059874	0	1st exon	Lrp11	NM_172784	0	1st exon
10.8088	7	chr10:80880885-80880914	AK083461	AK083461	4392	5'	Ncln	NM_134009	8477	3'
11.1167	7	chr11:116736823-116737007	Mgat5b	NM_172948	1282	1st intron	Mgat5b	NM_172948	2513	1st intron
11.3031	7	chr11:3033336-3033379	BC046305	BC046305	147	Intronic	BC046305	BC046305	962	Intronic
11.3057	7	chr11:3057292-3057313	AK133558	AK133558	435	Intronic	AK133558	AK133558	565	Intronic
11.3624	7	chr11:36239951-36239972	Odz2	NM_011856	11210	Intronic	Odz2	NM_011856	468128	Intronic
11.7172	7	chr11:71724952-71725041	BC030477	NM_177618	119157	intergenic	Aipl1	BC028285	119919	intergenic
11.778	7	chr11:77796623-77796714	Sez6	AK147705	1433	3'	Phf12	AK170155	2254	5'
11.7877	7	chr11:78768795-78768879	Nos2	AF065919	1384	Intronic	Nos2	AF065919	159	Intronic
11.8454	7	chr11:84540522-84540597	Lhx1	NM_008498	198830	intergenic	Mrm1	NM_145433	88697	3'
11.8476	7	chr11:84760337-84760394	Znhit3	NM_001005223	27814	5'	Car4	BC012704	13668	5'
12.1057	7	chr12:105723557-105723627	Tcl1	AK149361	99826	5'	Bdkrb2	NM_009747	240628	intergenic
12.3005	7	chr12:30051295-30051325	Tssc1	NM_201357	597637	intergenic	Myt1l	NM_008666	63360	5'
12.4757	7	chr12:47572719-47572766	AK034094	AK034094	0	1st exon	AK034094	AK034094	0	1st exon
12.6067	7	chr12:6068493-6068534	2810032G03Rik	NM_028318	625875	intergenic	AK147540	AK147540	1967895	intergenic
12.7126	7	chr12:71265819-71265860	Trim9	AK163123	0	1st exon	Trim9	AK129109	0	1st exon
12.7849	7	chr12:78494004-78494106	Fut8	NM_016893	99228	3'	Gphn	NM_172952	651517	intergenic
12.8922	7	chr12:89222954-89222974	Adck1	BC010539	247767	intergenic	Nrxn3	AK149250	13401	5'
13.569	7	chr13:56905214-56905293	Trpc7	AK135153	0	1st exon	Trpc7	AK135153	0	1st exon
13.5933	7	chr13:59333288-59333307	Ntrk2	NM_001025074	193709	intergenic	Agtpbp1	BC060633	126218	intergenic
14.1033	7	chr14:103339595-103339616	D130079A08Rik	NM_177223	4777	1st intron	D130079A08Rik	NM_177223	5291	1st intron
14.7895	7	chr14:78950093-78950156	Olfm4	AK133536	193109	intergenic	Pcdh17	BC079850	4303464	intergenic
14.8547	7	chr14:85465750-85465904	Pcdh17	BC079850	2123611	intergenic	Diap3	AK220493	21280	3'
15.7203	7	chr15:72029956-72030051	A830008O07	NM_177819	472496	intergenic	1810044A24Rik	BC070463	386872	intergenic
15.7285	7	chr15:72854142-72854318	1810044A24Rik	NM_180662	887	Intronic	1810044A24Rik	NM_180662	4546	Intronic
15.8394	7	chr15:83936905-83936929	Sult4a1	NM_013873	3397	5'	AK014771	AK014771	3203	3'
16.815	7	chr16:81506007-81506060	Ncam2	AF001287	0	intragenic	Ncam2	AF001287	0	intragenic
16.909	7	chr16:90900411-90900581	1110004E09Rik	BC019533	76824	5'	BC027145	BC027145	3138	3'
18.7705	7	chr18:77051977-77051995	Smad2	NM_010754	620890	intergenic	Ier3ip1	NM_025409	82503	5'
18.7762	7	chr18:77622102-77622156	AK030047	AK030047	35351	3'	AK133955	AK133955	44032	3'
18.866	7	chr18:86605381-86605386	Neto1	NM_144946	9863	Intronic	Neto1	NM_144946	2423	Intronic
19.4707	7	chr19:47070004-47070066	Ina	NM_146100	905	1st intron	Ina	NM_146100	5107	1st intron
X.139150826	7	chrX:139151158-139151239	Dcx	AK048410	27489	Intronic	Dcx	AK048410	18257	Intronic
X.71913552	7	chrX:71920559-71920568	Rab39b	NM_175122	89639	5'	Pls3	BC005459	117820	intergenic
Y.1025602	7	chrY:1033114-1033257	Usp9y	NM_148943	236960	intergenic	Zfy2	NM_009571	357897	intergenic
Y.1148663	7	chrY:1149899-1149902	Usp9y	NM_148943	353675	intergenic	Zfy2	NM_009571	241182	intergenic
Y.1241564	7	chrY:1242173-1242176	Usp9y	NM_148943	445949	intergenic	Zfy2	NM_009571	148908	intergenic
Y.1480849	7	chrY:1480953-1481079	Zfy2	NM_009571	25738	5'	BC111527	BC111527	466323	intergenic
Y.64669	7	chrY:70210-70391	Zfy1	NM_009570	789	Intronic	Zfy1	NM_009570	1160	Intronic
Y.741235	7	chrY:742142-742244	Usp9y	NM_148943	9934	Intronic	Usp9y	NM_148943	6666	Intronic
Y.879134	7	chrY:882893-883748	Usp9y	NM_148943	87095	5'	Zfy2	NM_009571	507762	intergenic
1.13743	8	chr1:137432516-137432546	Nav1	AK158038	8216	1st intron	Nav1	AK158038	71797	1st intron
2.11264	8	chr2:112643871-112643979	AK008770	AK008770	186538	intergenic	4930563P21Rik	NM_029232	442644	intergenic
2.13899	8	chr2:138990168-138990268	Btbd3	NM_001025431	1011356	intergenic	C130053K05Rik	NM_175467	195141	intergenic
2.14323	8	chr2:143228109-143228174	Otor	NM_020595	455003	intergenic	Pcsk2	NM_008792	9477	5'
2.15163	8	chr2:151629439-151629477	Angpt4	AK132988	1249	Intronic	Angpt4	AK132988	886	Intronic
2.15377	8	chr2:153767837-153767912	Psp	NM_008953	60361	3'	1700058C13Rik	NM_028528	53912	5'
2.15828	8	chr2:158286683-158286822	BC054059	NM_145635	87113	3'	Slc32a1	BC052020	15454	5'
2.1718	8	chr2:171802007-171802082	Cbln4	NM_175631	67373	5'	Mc3r	NM_008561	137651	intergenic
2.31165	8	chr2:31168258-31168310	Freq	NM_019681	50806	3'	BC034076	NM_177649	91785	5'
3.1037	8	chr3:103703136-103703292	Trim33	NM_053170	218593	intergenic	Syt6	NM_018800	1126	5'
3.14175	8	chr3:141748891-141749007	Unc5c	AK164239	7609	Intronic	Unc5c	AK164239	5222	Intronic
3.33334	8	chr3:33334610-33334742	Pex2	AK083141	45	5'	Ttc14	AK031605	657062	intergenic
3.78911	8	chr3:78911599-78911641	Fstl5	NM_178673	2115689	intergenic	AK172139	AK172139	283371	intergenic
3.80888	8	chr3:80888883-80888964	Gria2	NM_013540	205	5'	Glrb	NM_010298	40606	3'
4.12382	8	chr4:123819503-123819647	Rragc	BC071245	380282	intergenic	AK160260	AK160260	251916	intergenic
4.12438	8	chr4:124384753-124384834	Epha10	NM_177671	509	1st intron	Epha10	NM_177671	1410	1st intron
4.13955	8	chr4:139555723-139555795	Igsf21	NM_198610	36899	5'	AK030056	AK030056	36971	3'
4.14713	8	chr4:147130661-147130702	BC070441	BC070441	14477	1st intron	BC070441	BC070441	840	1st intron
4.15003	8	chr4:150029699-150029740	Vamp3	NM_009498	127966	intergenic	AK144150	AK144150	594532	intergenic
4.15061	8	chr4:150607992-150608006	Vamp3	NM_009498	706246	intergenic	AK144150	AK144150	16252	3'
4.15386	8	chr4:153862648-153862746	Plcl4	DQ176851	7913	5'	AK144422	AK144422	23147	5'
4.22736	8	chr4:22736629-22736634	Pou3f2	X66602	157498	intergenic	F730047E07Rik	BC094429	1851887	intergenic
4.41795	8	chr4:41795634-41795662	Dnaic1	NM_175138	1147	Intronic	Dnaic1	NM_175138	3226	Intronic
4.68439	8	chr4:68442077-68442196	Dbccr1	NM_019967	1378	5'	AK030082	AK030082	966744	intergenic
5.11078	8	chr5:110784728-110784832	Galnt9	AK032568	0	1st exon	Galnt9	AK032568	0	1st exon
5.11383	8	chr5:113825482-113825597	C530024P05Rik	NM_177292	10147	3'	Cmklr1	U79525	48792	3'
5.13483	8	chr5:134829658-134829669	Cyln2	NM_009990	9799	1st intron	Cyln2	NM_009990	7008	1st intron
5.14047	8	chr5:140470455-140470600	Mad1l1	AF083813	23995	Intronic	Mad1l1	AF083813	43443	Intronic
5.14295	8	chr5:142947399-142947433	Wipi2	NM_178398	25574	3'	Zfp469	NM_178242	72367	3'
6.80914	8	chr6:8092051-8092076	Rnps1	AK146443	158625	intergenic	BC020002	NM_145374	67164	5'
7.11779	8	chr7:117792446-117792525	Nucb2	NM_016773	1460782	intergenic	Rps15a	NM_170669	103040	intergenic
7.12922	8	chr7:129216744-129216786	Sec23ip	NM_001029982	641831	intergenic	Brwd2	AK170058	166299	intergenic
7.1441	8	chr7:144103835-144103924	Dhcr7	NM_007856	446080	intergenic	Cttn	NM_007803	141233	intergenic
7.2485	8	chr7:24850756-24850773	Pou2f2	X57940	9544	5'	LOC434147	NM_001033781	10451	5'
7.30141	8	chr7:30143106-30143170	AY078069	NM_172142	5633	3'	Aplp1	NM_007467	602	3'
7.3019	8	chr7:30193134-30193257	Nphs1	AF191090	1855	Intronic	Nphs1	AF191090	2148	Intronic
7.31164	8	chr7:31164801-31164818	Abpe	NM_207262	151072	intergenic	Abpd	NM_001009952	1908292	intergenic
7.82501	8	chr7:82501649-82501794	Sh3gl3	AK012114	318123	intergenic	1700129I04Rik	NM_177894	7422	3'
8.10923	8	chr8:109227100-109227123	Smpd3	NM_021491	0	1st exon	Smpd3	NM_021491	0	1st exon
8.1263	8	chr8:126300535-126300561	Tubb3	NM_023279	2796	1st intron	Tubb3	NM_023279	3633	1st intron
8.73814	8	chr8:73814768-73814807	Slc5a5	NM_053248	762	Intronic	Slc5a5	NM_053248	230	Intronic
8.93092	8	chr8:9309586-9309707	Tmem28	NM_173446	76569	1st intron	Tmem28	AK149049	11847	3'
9.49092	8	chr9:49093451-49093473	Drd2	NM_010077	508	1st intron	Drd2	NM_010077	54351	1st intron
9.58197	8	chr9:58197873-58197947	BC100468	BC100468	29338	5'	6030419C18Rik	NM_176921	88828	5'
9.75469	8	chr9:75469701-75469802	Scg3	NM_009130	0	1st exon	Scg3	BC024785	0	1st exon
9.99027	8	chr9:99027869-99027959	Pik3cb	NM_029094	78475	5'	Cep70	AK133048	24899	5'
10.1101	8	chr10:110080794-110080845	Syt1	NM_009306	1666090	intergenic	E2f7	AK051521	68754	5'
10.4707	8	chr10:4707242-4707276	Vip	NM_011702	0	1st exon	Vip	NM_011702	0	1st exon
10.6041	8	chr10:60418945-60418963	AK007277	AK007277	85465	5'	Pcbd1	NM_025273	65762	5'
11.1035	8	chr11:103472867-103472988	Rprml	NM_001033212	6257	3'	Gosr2	NM_019650	20022	3'
11.104	8	chr11:104014134-104014187	4933407P14Rik	BC100418	7150	3'	Mapt	NM_001038609	33364	5'
11.1076	8	chr11:107633536-107633582	Cacng1	NM_007582	100993	intergenic	Cacng5	NM_080644	57134	3'
11.3061	8	chr11:3062635-3062666	AK133558	AK133558	2501	Intronic	AK133558	AK133558	1908	Intronic
11.3081	8	chr11:3082898-3082901	BC046305	BC046305	3389	Intronic	BC046305	BC046305	3167	Intronic
11.8455	8	chr11:84545570-84545657	Lhx1	NM_008498	203884	intergenic	Mrm1	NM_145433	83643	3'
13.1908	8	chr13:19079861-19080060	Amph	AK132168	26462	Intronic	Amph	AK132168	4834	Intronic
14.3143	8	chr14:31426406-31426456	9430077A04Rik	NM_177134	0	1st exon	9430077A04Rik	NM_177134	0	1st exon
14.6401	8	chr14:64013060-64013158	Extl3	BC065073	0	intragenic	Extl3	BC065073	0	intragenic
14.741	8	chr14:74101114-74101138	3110050K21Rik	NM_026083	22545	3'	Nurit	NM_026457	215904	intergenic
15.88	8	chr15:88002270-88002288	AW049604	NM_134096	415151	intergenic	Zdhhc25	NM_027306	425787	intergenic
16.2053	8	chr16:20533401-20533542	AK013788	AK013788	0	intragenic	AK013788	AK013788	0	intragenic
17.2497	8	chr17:24967333-24967426	Gnptg	AK078230	0	intragenic	Gnptg	AK078230	0	intragenic
17.2719	8	chr17:27194426-27194457	Grm4	NM_001013385	12230	Intronic	Grm4	NM_001013385	6054	Intronic
17.3012	8	chr17:30116868-30116872	Btbd9	NM_172618	55526	Intronic	Btbd9	AK006275	24670	1st intron
18.4252	8	chr18:42522254-42522325	BC054080	BC054080	54797	3'	Tcerg1	NM_001039474	115169	intergenic
Y.1117751	8	chrY:1119441-1119441	Usp9y	NM_148943	323216	intergenic	Zfy2	NM_009571	271641	intergenic
Y.1638963	8	chrY:1652745-1652775	Zfy2	NM_009571	197482	intergenic	BC111527	BC111527	294579	intergenic
Y.1787228	8	chrY:1790544-1790641	Zfy2	NM_009571	335314	intergenic	BC111527	BC111527	156747	intergenic
Y.1831833	8	chrY:1847759-1847793	Zfy2	NM_009571	392498	intergenic	BC111527	BC111527	99563	5'
Y.962510	8	chrY:967407-967531	Usp9y	NM_148943	171244	intergenic	Zfy2	NM_009571	423613	intergenic
1.13463	9	chr1:134626954-134627009	Nfasc	NM_182716	57678	5'	Lrrn2	NM_010732	80918	5'
1.1752	9	chr1:175198469-175198578	Igsf4b	NM_053199	15286	1st intron	Igsf4b	NM_053199	5563	1st intron
1.63548	9	chr1:63549074-63549158	Adam23	NM_011780	18326	3'	Mdh1b	BC050786	83985	3'
1.85058	9	chr1:85058782-85058908	5830484A20Rik	AK139759	922	1st intron	AK047983	AK047983	66523	3'
1.95101	9	chr1:95103034-95103118	Sned1	AJ584850	62	Intronic	Sned1	AJ584850	1377	Intronic
2.12105	9	chr2:121049831-121050047	Hisppd2a	AK046696	3421	5'	Ckmt1	NM_009897	141	5'
2.15637	9	chr2:156368596-156368681	0610011L14Rik	NM_026661	108225	intergenic	Dlgap4	NM_146128	23480	5'
2.16313	9	chr2:163130758-163130829	Gdap1l1	AK140488	627	1st intron	Gdap1l1	NM_144891	6671	1st intron
2.17821	9	chr2:178206725-178206837	Phactr3	NM_028806	7874	Intronic	Phactr3	NM_028806	1522	Intronic
2.18107	9	chr2:181066500-181066585	Kcnq2	NM_001006668	1909	5'	Eef1a2	NM_007906	10557	3'
2.53261	9	chr2:53262426-53262502	Arl6ip6	NM_022989	221429	intergenic	Rprm	NM_023396	637013	intergenic
2.65419	9	chr2:65420562-65420831	AK148881	AK148881	52367	5'	A330102K23Rik	AK082649	225983	intergenic
2.92202	9	chr2:92202497-92202523	Mapk8ip1	AF003115	408	5'	Cry2	NM_009963	1975	3'
3.56877	9	chr3:56877403-56877410	AK043125	AK043125	1002575	intergenic	Tm4sf1	NM_008536	497296	intergenic
4.10105	9	chr4:101048721-101048799	Dnajc6	NM_198412	0	1st exon	Dnajc6	NM_198412	0	1st exon
4.12413	9	chr4:124135661-124135780	AK013916	AK013916	22614	5'	Utp11l	NM_026031	45348	3'
4.13971	9	chr4:139712154-139712203	AK030056	AK030056	116800	intergenic	Arhgef10l	NM_172415	74381	3'
4.91944	9	chr4:9196638-9196695	4933402J24Rik	AK034888	0	1st exon	4933402J24Rik	AK034888	0	1st exon
5.12068	9	chr5:120684756-120684806	Rbm19	NM_028762	225193	intergenic	Lhx5	NM_008499	7735	5'
5.27873	9	chr5:27875637-27875677	Dpp6	BC085154	6836	Intronic	Dpp6	BC085154	12680	Intronic
6.55349	9	chr6:55350059-55350215	Ghrhr	NM_001003685	32240	3'	Adcyap1r1	NM_007407	31419	5'
6.89034	9	chr6:89035778-89035784	Gpr175	BC028977	157925	intergenic	4933427D06Rik	NM_175017	26038	5'
7.12139	9	chr7:121393058-121393067	Otoa	NM_139310	438825	intergenic	AK122466	AK122466	40106	3'
7.12329	9	chr7:123294636-123294647	AK080486	AK080486	2867	5'	AK086648	AK086648	841057	intergenic
7.12661	9	chr7:126616775-126616822	BC093505	BC093505	556	Intronic	BC093505	BC093505	1814	Intronic
7.15304	9	chr7:15306371-15306394	Slc8a2	BC080277	2507	Intronic	Slc8a2	BC080277	2479	Intronic
7.18441	9	chr7:18441655-18441712	Rtn2	NM_013648	296	1st intron	Rtn2	NM_013648	3372	1st intron
7.24854	9	chr7:24854826-24854858	Pou2f2	X57940	13622	5'	LOC434147	NM_001033781	6373	5'
7.37812	9	chr7:3781729-3781752	Cdc42ep5	NM_021454	13954	5'	Ncr1	NM_010746	159069	intergenic
7.44203	9	chr7:44203842-44203862	Clec11a	NM_009131	28916	5'	Syt3	NM_016663	49009	5'
7.46264	9	chr7:46264868-46264895	Myod1	BC103613	18019	3'	Kcnc1	NM_008421	701	5'
8.11309	9	chr8:113086030-113086080	Calb2	AK032171	28716	5'	BC025546	NM_146215	21061	5'
8.11483	9	chr8:114828118-114828121	Gabarapl2	BC026798	231	Intronic	Gabarapl2	BC026798	1054	Intronic
8.87359	9	chr8:87361466-87361583	Cacna1a	AK147277	8594	Intronic	Cacna1a	AK147277	43542	Intronic
8.97683	9	chr8:9769126-9769228	Tmem28	AK149049	445494	intergenic	Tmem28	NM_173446	870	1st intron
9.12255	9	chr9:122550611-122550795	Abhd5	NM_026179	320482	intergenic	D9Ertd402e	NM_001013405	103593	intergenic
9.24292	9	chr9:24292510-24292523	Dpy19l1	NM_172920	54195	5'	1700009B20Rik	NM_173412	83074	5'
9.42402	9	chr9:42403871-42403931	Grik4	NM_175481	23768	Intronic	Grik4	NM_175481	2579	Intronic
9.56461	9	chr9:56462466-56462562	Lrrn6a	NM_181074	10545	Intronic	Lrrn6a	NM_181074	10044	Intronic
9.74655	9	chr9:74655109-74655126	Onecut1	NM_008262	5113	1st intron	Onecut1	NM_008262	20791	1st intron
10.4076	9	chr10:40760494-40760538	Gpr6	AK139367	498	1st intron	Gpr6	AK139367	24	1st intron
10.9031	9	chr10:90310799-90310850	E030041M21Rik	NM_029166	1062625	intergenic	Apaf1	AK220340	108291	intergenic
11.1014	9	chr11:101418698-101418766	Tmem106a	NM_144830	11729	3'	Rdm1	NM_025654	25305	5'
11.1077	9	chr11:107736155-107736441	Cacng5	NM_080644	8846	5'	Prkca	BC096493	17958	3'
11.1185	9	chr11:118475500-118475501	D11Bwg0517e	BC054403	49212	Intronic	D11Bwg0517e	BC054403	11237	Intronic
11.3358	9	chr11:33580264-33580358	Kcnip1	AK045948	28739	1st intron	Kcnip1	AY171234	162817	1st intron
11.7231	9	chr11:72310387-72310429	BC011467	BC011467	4293	5'	9830002I17Rik	NM_029932	3943	3'
11.8043	9	chr11:80429835-80429846	Cdk5r1	NM_009871	132466	intergenic	Tmem98	NM_029537	196768	intergenic
11.9813	9	chr11:98130258-98130330	Crkrs	NM_026952	67501	3'	Neurod2	BC058965	12339	3'
12.1079	9	chr12:107918253-107918343	Vrk1	NM_011705	1439838	intergenic	AK014062	AK014062	23646	5'
12.7572	9	chr12:75722989-75723009	Dbpht2	NM_198866	504745	intergenic	Kcnh5	NM_172805	93059	3'
12.8212	9	chr12:82125231-82125266	Slc8a3	BC052435	1384	Intronic	Slc8a3	NM_080440	3052	Intronic
12.8744	9	chr12:87436909-87436925	Esrrb	NM_011934	26194	3'	Vash1	AK090166	130884	intergenic
13.2528	9	chr13:25276667-25276705	Vmp	NM_009513	1131	1st intron	Vmp	NM_009513	619	1st intron
13.4246	9	chr13:42458015-42458039	Edn1	NM_010104	139066	intergenic	Phactr1	NM_198419	233566	intergenic
13.7032	9	chr13:70319809-70320043	D13Wsu50e	NM_138596	36460	3'	BC026613	BC026613	736140	intergenic
13.9598	9	chr13:95979127-95979132	Otp	NM_011021	908	Intronic	Otp	NM_011021	4658	Intronic
14.2848	9	chr14:28484171-28484279	Cacna2d3	NM_009785	122617	Intronic	Cacna2d3	NM_009785	63656	Intronic
14.3593	9	chr14:35927406-35927521	Gcap14	NM_027045	47458	5'	Rgr	NM_021340	21266	3'
14.4845	9	chr14:48447226-48447244	Slc35f4	AK047949	202801	1st intron	Slc35f4	AK047949	225	1st intron
15.7789	9	chr15:77893955-77893969	Cacng2	NM_007583	53311	1st intron	Cacng2	NM_007583	51972	1st intron
17.3358	9	chr17:33583242-33583312	Vps52	NM_172620	5839	3'	AA388235	NM_001013793	8667	5'
18.2582	9	chr18:25820662-25820775	AK082301	AK082301	59360	5'	Brunol4	BC052744	1703	Intronic
18.6439	9	chr18:64391966-64392060	St8sia3	NM_009182	994	1st intron	St8sia3	NM_009182	301	1st intron
19.373	9	chr19:37304523-37304529	March5	NM_027314	17245	3'	Kif11	NM_010615	137019	intergenic
Y.1201360	9	chrY:1204401-1204716	Usp9y	NM_148943	408333	intergenic	Zfy2	NM_009571	186524	intergenic
Y.313035	9	chrY:318108-318182	Jarid1d	NM_011419	37891	3'	Eif2s3y	AK012186	28891	5'
Y.462099	9	chrY:472427-472512	Uty	AF057367	1040	Intronic	Uty	AF057367	820	Intronic
Y.678623	9	chrY:690413-690605	Usp9y	NM_148943	1791	Intronic	Usp9y	NM_148943	2071	Intronic
1.16154	10	chr1:161538939-161538972	Tnr	NM_022312	178063	1st intron	Tnr	NM_022312	35231	1st intron
1.17914	10	chr1:179145246-179145320	Akt3	NM_011785	59841	5'	Zfp238	NM_001012330	136051	intergenic
2.10948	10	chr2:109476856-109476880	Bdnf	NM_007540	690	1st intron	Bdnf	NM_007540	47351	1st intron
2.16467	10	chr2:164671147-164671162	Slc12a5	NM_020333	429	Intronic	Slc12a5	NM_020333	204	Intronic
2.16688	10	chr2:166880136-166880146	Kcnb1	NM_008420	137	5'	Ptgis	AK048059	2869	3'
2.17201	10	chr2:172012229-172012348	Mc3r	NM_008561	69969	3'	2010011I20Rik	BC057642	24532	5'
2.17912	10	chr2:179123307-179123356	Cdh26	AK132328	706559	intergenic	4930591A17Rik	NM_026596	221011	intergenic
2.19346	10	chr2:19346900-19346959	Msrb2	NM_029619	34207	3'	Ptf1a	AK007922	16461	5'
2.937	10	chr2:93700990-93700990	Gm1967	AK135828	31048	5'	Gm1967	AK163963	30113	1st intron
3.10544	10	chr3:105435889-105435949	AK016218	AK016218	229057	intergenic	Kcnd3	NM_001039347	144465	intergenic
3.15276	10	chr3:152758794-152758826	St6galnac5	NM_012028	0	intragenic	St6galnac5	NM_012028	0	intragenic
3.62682	10	chr3:62682948-62682984	Gpr149	NM_177346	0	intragenic	Gpr149	NM_177346	0	intragenic
4.12036	10	chr4:120364127-120364164	AK136831	AK136831	11388	1st intron	AK136831	AK136831	5965	1st intron
4.13695	10	chr4:136948267-136948344	AK133251	AK133251	19906	3'	BC052065	BC052065	5483	5'
4.1468	10	chr4:146801053-146801154	2510039O18Rik	NM_029841	9989	3'	Nppb	NM_008726	28594	5'
5.13613	10	chr5:136128241-136128260	2900083I11Rik	NM_021403	1657	3'	2900083I11Rik	BC051947	8558	Intronic
5.27366	10	chr5:27366278-27366358	Dpp6	BC085154	130243	1st intron	Dpp6	AK158964	13666	5'
5.27697	10	chr5:27696926-27696929	Dpp6	BC048383	103779	1st intron	Dpp6	NM_010075	16613	1st intron
5.37124	10	chr5:37124419-37124434	Man2b2	NM_008550	5550	5'	Ppp2r2c	NM_172994	32391	5'
5.62769	10	chr5:62771932-62772012	Pcdh7	NM_018764	4754288	intergenic	AK034089	AK034089	1156501	intergenic
6.11385	10	chr6:113847780-113847800	Atp2b2	AK147399	39368	1st intron	Atp2b2	AK147399	9238	1st intron
6.11405	10	chr6:114052840-114052896	Atp2b2	NM_009723	45247	5'	Slc6a11	NM_172890	43966	5'
6.28295	10	chr6:28295272-28295401	AK018330	AK018330	126424	intergenic	Gcc1	NM_028900	71363	3'
6.55036	10	chr6:55037996-55038042	Crhr2	AY445512	3632	Intronic	Crhr2	AY445512	8971	Intronic
6.89063	10	chr6:8907508-8907721	Nxph1	AK139424	5184	3'	Nxph1	NM_008751	289469	1st intron
7.1189	10	chr7:118903116-118903116	Gprc5b	NM_022420	116812	intergenic	Gp2	AK009843	330573	intergenic
7.40534	10	chr7:40535920-40535973	3000002G13Rik	NM_001004139	1221328	intergenic	2900093B09Rik	NM_021387	136483	intergenic
7.91142	10	chr7:91143068-91143201	1110001A23Rik	NM_026734	791947	intergenic	2310015N07Rik	BC034878	1293275	intergenic
7.98314	10	chr7:98315346-98315403	Lrrc54	NM_001024619	78894	5'	LOC434214	NM_001034890	31349	5'
8.12678	10	chr8:126777468-126777492	BC036300	BC036300	31181	5'	Acta1	NM_009606	377	3'
8.77747	10	chr8:77747979-77748027	AK144838	AK144838	17994	5'	AK018615	AK018615	21241	5'
9.10651	10	chr9:106514436-106514503	Iqcf4	NM_026090	85401	5'	Tex264	AK159046	2385	3'
9.43449	10	chr9:43449559-43449605	Trim29	BC027353	362473	intergenic	Pvrl1	NM_021424	45987	5'
10.1297	10	chr10:129683087-129683106	Neurod4	NM_007501	8735	1st intron	Neurod4	NM_007501	8	1st intron
10.7642	10	chr10:76422013-76422024	Pcbp3	AK079564	16384	5'	AK143813	AK143813	33691	5'
11.1037	10	chr11:103736937-103736951	Nsf	NM_008740	4182	Intronic	Nsf	NM_008740	5292	Intronic
11.9689	10	chr11:96894874-96895036	Mrpl10	NM_026154	29652	3'	Tbx21	NM_019507	19207	3'
12.3011	10	chr12:30116721-30116747	Myt1l	NM_008666	1832	1st intron	Myt1l	BC079651	4306	5'
12.8787	10	chr12:87873416-87873473	2310044G17Rik	BC026384	20538	3'	Tmem63c	NM_172583	42221	5'
13.1013	10	chr13:101310981-101311027	Birc1b	AY147001	8655	5'	Birc1e	BC070433	997	3'
13.1102	10	chr13:110237094-110237180	Pde4d	AK035860	0	1st exon	Pde4d	AK035860	0	1st exon
15.6213	10	chr15:62126932-62126990	AK090048	AK090048	54734	Intronic	AK090048	AK090048	16073	Intronic
16.1041	10	chr16:10415542-10415570	C2ta	AF042159	65	Intronic	C2ta	AF042159	156	Intronic
16.238	10	chr16:23805673-23805745	Sst	NM_009215	419	1st intron	Sst	NM_009215	245	1st intron
16.5797	10	chr16:5797424-5797449	5730409G15Rik	AK133590	626159	intergenic	A2bp1	BC053009	2676	5'
17.2513	10	chr17:25128246-25128291	Cacna1h	NM_021415	2823	Intronic	Cacna1h	AB041801	31177	3'
17.8473	10	chr17:84729102-84729129	Lrpprc	NM_028233	30274	5'	Ppm1b	NM_011151	137224	intergenic
18.3818	10	chr18:38182484-38182490	Centd3	AK220486	58946	5'	Pcdh1	BC040402	140180	intergenic
18.7705	10	chr18:77057686-77057687	Smad2	NM_010754	626590	intergenic	Ier3ip1	NM_025409	76803	5'
19.4171	10	chr19:41714519-41714527	Slit1	NM_015748	8446	Intronic	Slit1	NM_015748	59826	Intronic
19.4474	10	chr19:44745776-44745881	Hif1an	NM_176958	116244	intergenic	Pax2	NM_011037	64875	5'
Y.1124702	10	chrY:1129877-1130111	Usp9y	NM_148943	333769	intergenic	Zfy2	NM_009571	261088	intergenic
Y.1394258	10	chrY:1398184-1398706	Zfy2	NM_009571	3526	Intronic	Zfy2	NM_009571	2596	Intronic
Y.1484782	10	chrY:1493532-1493724	Zfy2	NM_009571	38350	5'	BC111527	BC111527	453711	intergenic
Y.1769888	10	chrY:1777989-1778031	Zfy2	NM_009571	322732	intergenic	BC111527	BC111527	169329	intergenic
Y.49950	10	chrY:55877-55887	No annotation yet				Zfy1	NM_009570	5768	3'
Y.630012	10	chrY:634783-634807	Ddx3y	NM_012008	11797	5'	Usp9y	NM_148943	608	3'
Y.655857	10	chrY:659434-659512	Usp9y	NM_148943	3832	Intronic	Usp9y	NM_148943	1827	Intronic
Y.81771	10	chrY:86498-86557	Zfy1	NM_009570	10941	Intronic	Zfy1	NM_009570	9764	Intronic
2.12941	11	chr2:129407340-129407346	Pdyn	NM_018863	16069	5'	Stk35	NM_183262	84657	5'
2.79255	11	chr2:79255184-79255265	Neurod1	NM_010894	0	intragenic	Neurod1	NM_010894	0	intragenic
3.89848	11	chr3:89850372-89850452	Chrnb2	NM_009602	0	1st exon	Chrnb2	NM_009602	0	1st exon
4.10307	11	chr4:103070096-103070121	Oma1	NM_025909	205748	intergenic	BC051993	BC051993	47487	5'
4.15424	11	chr4:154241350-154241377	Gabrd	NM_008072	8517	1st intron	Gabrd	NM_008072	330	1st intron
5.11398	11	chr5:113977735-113977792	AK006923	AK006923	12816	Intronic	AK006923	AK006923	6934	Intronic
5.14023	11	chr5:140231568-140231575	A930017N06Rik	NM_175522	4375	3'	Mad1l1	AF083813	29591	3'
6.11415	11	chr6:114152878-114152920	Slc6a11	NM_172890	25131	Intronic	Slc6a11	NM_172890	7305	Intronic
6.88974	11	chr6:8898651-8898766	Nxph1	AK139424	0	1st exon	Nxph1	AK139424	0	1st exon
7.11049	11	chr7:110493077-110493140	Adm	NM_009627	72112	3'	B430319F04Rik	NM_001033810	64744	3'
7.25015	11	chr7:25015306-25015332	Pafah1b3	NM_008776	8604	5'	BC059093	BC059093	61062	3'
8.10818	11	chr8:108180149-108180172	C730015A04Rik	NM_177788	0	intragenic	C730015A04Rik	NM_177788	0	intragenic
8.81334	11	chr8:81334358-81334469	Pou4f2	NM_138944	1689	5'	Rbmxrt	NM_009033	66928	3'
9.12164	11	chr9:121640078-121640184	Gup1	NM_029095	672	1st intron	Gup1	NM_029095	828	1st intron
9.56535	11	chr9:56536553-56536583	Lrrn6a	NM_181074	53178	5'	Odf3l1	NM_198673	110227	intergenic
10.118	11	chr10:11797228-11797355	Timm8a	BC094631	496663	intergenic	Utrn	NM_011682	276277	intergenic
10.6999	11	chr10:69993779-69993844	Phyhipl	BC037618	27492	1st intron	Phyhipl	BC037618	492	1st intron
11.4847	11	chr11:4849303-4849392	Ap1b1	AK034140	1399	1st intron	Ap1b1	AK165747	37564	5'
11.7121	11	chr11:71205956-71205959	6330403K07Rik	NM_134022	356307	intergenic	9230020A06Rik	NM_001033803	126772	intergenic
11.7175	11	chr11:71753487-71753491	BC030477	NM_177618	147650	intergenic	Aipl1	BC028285	91426	3'
11.7499	11	chr11:74989720-74989756	Hic1	NM_010430	4024	5'	Ovca2	NM_027136	2398	3'
11.8324	11	chr11:83237684-83237725	Rasl10b	NM_001013386	471	3'	1700020L24Rik	NM_025492	16185	5'
14.6271	11	chr14:62712577-62712644	Mtmr9	NM_177594	214547	intergenic	Xkr6	NM_173393	36517	5'
14.785	11	chr14:78504091-78504092	Pcdh8	AK048638	0	1st exon	Pcdh8	NM_021543	0	1st exon
15.276	11	chr15:27599830-27599858	BC052328	AK152590	0	intragenic	BC052328	AK152590	0	intragenic
16.2848	11	chr16:28479341-28479372	Fgf12	AK148215	118048	intergenic	Fgf12	NM_010199	193223	Intronic
16.952	11	chr16:95202774-95202775	Kcnj6	AK044218	96275	5'	Kcnj15	NM_001039057	163673	intergenic
17.45	11	chr17:45000047-45000086	Aarsl	NM_198608	15643	3'	Gm323	NM_001013749	5465	3'
17.7251	11	chr17:72508211-72508351	Alk	NM_007439	0	1st exon	Alk	NM_007439	0	1st exon
18.3834	11	chr18:38343089-38343150	Pcdh1	BC040402	7383	5'	AK039796	AK039796	21258	3'
19.1702	11	chr19:17022893-17022912	Foxb2	NM_008023	82053	5'	AK165582	AK165582	231	5'
19.2221	11	chr19:22206480-22206523	Trpm3	NM_001035240	103	1st intron	Trpm3	NM_177341	308802	intergenic
X.70120723	11	chrX:70122314-70122370	L1cam	NM_008478	2586	1st intron	L1cam	NM_008478	105	1st intron
1.16146	12	chr1:161458183-161458185	Tnr	NM_022312	97292	1st intron	Tnr	NM_022312	116002	1st intron
1.19544	12	chr1:195439729-195439777	Camk1g	NM_144817	368799	intergenic	Plxna2	NM_008882	880890	intergenic
1.664	12	chr1:66401385-66401396	BC052446	BC052446	25601	3'	Rpe	NM_025683	232709	intergenic
1.91613	12	chr1:91613182-91613207	Centg2	NM_178119	15559	Intronic	Centg2	NM_178119	7138	Intronic
2.16485	12	chr2:164851837-164851865	Cdh22	NM_174988	3277	Intronic	Cdh22	NM_174988	9975	Intronic
2.43435	12	chr2:43435800-43435841	Kynu	BC069848	9523	Intronic	Kynu	BC069848	15140	Intronic
3.31498	12	chr3:31499869-31499910	Slc7a14	NM_172861	50987	1st intron	Slc7a14	NM_172861	1158	1st intron
4.10959	12	chr4:109585981-109586019	Dmrta2	NM_172296	104384	intergenic	Elavl4	NM_010488	115668	intergenic
4.13833	12	chr4:138331886-138331904	Tmco4	NM_029857	655	3'	Htr6	NM_021358	1589	3'
4.14707	12	chr4:147073582-147073700	Fbxo2	NM_176848	63426	3'	AK160846	AK160846	7568	3'
7.13529	12	chr7:135292218-135292238	Foxi2	BC096623	40269	3'	Tmem12	NM_178669	58840	3'
7.24067	12	chr7:24068137-24068203	AK008654	AK008654	5163	3'	Kcnn4	NM_008433	10851	5'
7.30054	12	chr7:30055534-30055566	0610010E21Rik	NM_001033140	23318	3'	Lrfn3	NM_175478	8723	3'
8.10858	12	chr8:108582983-108582998	D130029J02Rik	NM_001033320	270	Intronic	D130029J02Rik	NM_001033320	151	Intronic
9.46393	12	chr9:46393906-46393923	4931429L15Rik	NM_183104	322933	intergenic	Igsf4a	AK013911	887336	intergenic
9.89535	12	chr9:89535415-89535431	B230218L05Rik	NM_207260	7200	1st intron	B230218L05Rik	NM_207260	551	1st intron
10.8015	12	chr10:80151922-80151951	Ap3d1	NM_007460	6596	5'	Dot1l	NM_199322	6397	5'
11.7443	12	chr11:74435540-74435581	Garnl4	NM_001015046	29241	5'	E130309D14Rik	NM_001013784	238	5'
12.1057	12	chr12:105667246-105667293	Tcl1	AK149361	43503	5'	Bdkrb2	NM_009747	296951	intergenic
12.2942	12	chr12:29417364-29417416	Tssc1	NM_201357	2343	Intronic	Tssc1	NM_201357	16348	Intronic
13.5477	12	chr13:54768125-54768148	Gprin1	NM_012014	8845	5'	Sncb	NM_033610	345	3'
14.1888	12	chr14:18884351-18884396	BC027644	BC027644	10584	5'	Kcnk5	NM_021542	46379	3'
14.2642	12	chr14:26423405-26423438	Ccdc66	BC070471	88077	5'	D14Ertd171e	NM_177814	25903	5'
15.7246	12	chr15:72464864-72464987	1810044A24Rik	NM_180662	46830	Intronic	1810044A24Rik	NM_180662	47612	Intronic
15.7378	12	chr15:73784875-73784875	Gm628	NM_001033365	117949	intergenic	Bai1	NM_174991	559062	intergenic
15.8275	12	chr15:82749074-82749141	Tcf20	NM_013836	9207	5'	Nfam1	AK152688	75393	3'
15.8468	12	chr15:84681822-84681857	AK042863	AK042863	45915	Intronic	AK042863	AK042863	664	Intronic
17.3488	12	chr17:34878201-34878227	H2-D1	AK159572	2666	3'	H2-Q1	BC080812	50384	5'
18.3613	12	chr18:36130792-36130819	Psd2	BC066036	81	Intronic	Psd2	BC066036	886	Intronic
19.4238	12	chr19:42379387-42379408	Crtac1	NM_145123	2238	Intronic	Crtac1	NM_145123	7788	Intronic
19.6501	12	chr19:6502754-6502809	AK163904	AK163904	4250	1st intron	Nrxn2	NM_020253	2092	Intronic
Y.1445357	12	chrY:1448025-1448109	Zfy2	NM_009571	13038	1st intron	Zfy2	NM_009571	6988	1st intron
2.15634	13	chr2:156344448-156344466	0610011L14Rik	NM_026661	84044	3'	Dlgap4	NM_146128	47661	5'
2.15766	13	chr2:157662232-157662332	Gm691	NM_198627	26124	3'	2610036D13Rik	NM_029282	10960	3'
2.94046	13	chr2:94046307-94046482	Hsd17b12	NM_019657	87646	5'	BC061503	BC061503	55216	3'
3.19886	13	chr3:19886784-19886876	Crh	NM_205769	189	1st intron	Crh	NM_205769	486	1st intron
4.12436	13	chr4:124362949-124362974	Gm50	NM_001007573	184	1st intron	Gm50	NM_001007573	974	1st intron
5.11353	13	chr5:113532655-113532719	Rutbc2	NM_172718	3485	Intronic	Rutbc2	NM_172718	18162	Intronic
5.13778	13	chr5:137783376-137783494	Actl6b	NM_031404	0	1st exon	Actl6b	NM_031404	0	1st exon
6.28929	13	chr6:28932560-28932644	AL033314	AK167576	47430	3'	Lep	NM_008493	77627	5'
6.33056	13	chr6:33056855-33056885	Chchd3	AK145337	66512	5'	Exoc4	AK014499	122414	intergenic
7.12303	13	chr7:123026764-123026799	Slc5a11	AF518726	0	intragenic	Slc5a11	AF518726	0	intragenic
7.12453	13	chr7:124533353-124533420	AK086648	AK086648	393518	intergenic	AK015957	AK015957	576119	intergenic
7.12674	13	chr7:126741202-126741212	Kctd13	NM_172747	4450	3'	Sez6l2	BC096615	562	5'
7.13792	13	chr7:137922531-137922556	Txnl2	NM_023140	615606	intergenic	Tcerg1l	NM_183289	174385	intergenic
7.27103	13	chr7:27105035-27105035	Spnb4	AB055618	1971	Intronic	Spnb4	AB055618	1674	Intronic
9.6442	13	chr9:64422685-64422750	2410080H04Rik	AK048840	80025	Intronic	2410080H04Rik	NM_172522	13522	Intronic
10.2884	13	chr10:28836518-28836541	AK029414	AK029414	2919	5'	Echdc1	NM_025855	166491	intergenic
10.7912	13	chr10:79121236-79121265	Hcn2	NM_008226	902	1st intron	Hcn2	NM_008226	6265	1st intron
10.9081	13	chr10:90814293-90814339	Tmpo	AK141845	212949	intergenic	Nedd1	NM_008682	1300227	intergenic
11.1039	13	chr11:103869529-103869628	Arf2	NM_007477	68154	3'	Crhr1	NM_007762	79392	5'
11.8323	13	chr11:83233446-83233458	Rasl10b	NM_001013386	4423	Intronic	Rasl10b	NM_001013386	593	Intronic
11.8448	13	chr11:84478350-84478366	Lhx1	NM_008498	136629	intergenic	Mrm1	NM_145433	150898	intergenic
12.1034	13	chr12:103350796-103350817	Btbd7	NM_172806	71350	5'	AK144534	AK144534	109321	intergenic
12.1126	13	chr12:112589303-112589326	2010107E04Rik	NM_027360	174529	intergenic	A730018C14Rik	NM_176956	272409	intergenic
13.779	13	chr13:77902533-77902541	AK164185	AK164185	104627	Intronic	AK164185	AK164185	173535	Intronic
17.3945	13	chr17:39456412-39456439	Olfr130	NM_146487	1780246	intergenic	Pgk2	NM_031190	214071	intergenic
17.8292	13	chr17:82919426-82919435	Slc8a1	U70033	1272727	intergenic	AW548124	NM_134117	204196	intergenic
Y.1036295	13	chrY:1051214-1051417	Usp9y	NM_148943	255090	intergenic	Zfy2	NM_009571	339767	intergenic
Y.1715104	13	chrY:1718582-1718741	Zfy2	NM_009571	263383	intergenic	BC111527	BC111527	228678	intergenic
Y.280873	13	chrY:286424-286436	Jarid1d	NM_011419	6176	3'	Eif2s3y	AK012186	60606	5'
Y.640524	13	chrY:645842-645916	Usp9y	NM_148943	1365	Intronic	Usp9y	NM_148943	1072	Intronic
1.16136	14	chr1:161360897-161360947	Tnr	NM_022312	30	1st intron	Tnr	NM_022312	213264	1st intron
2.1137	14	chr2:113703481-113703485	Gja9	NM_010290	119	1st intron	Gja9	NM_010290	1020	1st intron
2.18068	14	chr2:180685593-180685643	AK006122	AK006122	13932	3'	Bhlhb4	NM_080641	18446	3'
4.1248	14	chr4:124802983-124803018	Zc3h12a	NM_153159	172856	intergenic	Ftl1	BC106145	203416	intergenic
4.12616	14	chr4:126157823-126157864	5730409E04Rik	NM_001013755	42065	3'	Psmb2	NM_011970	22125	5'
4.13329	14	chr4:133292947-133292947	Lin28	NM_145833	2055	5'	Cd52	NM_013706	72666	3'
4.15113	14	chr4:151130936-151130954	Hes3	NM_008237	0	intragenic	Hes3	NM_008237	0	intragenic
4.44281	14	chr4:44281616-44281655	Rnf38	NM_001038993	92196	5'	Melk	NM_010790	40380	5'
4.44527	14	chr4:44532976-44532985	Melk	NM_010790	147205	intergenic	Zcchc7	NM_177027	244686	intergenic
5.14695	14	chr5:146955110-146955142	Gpr12	NM_001010941	59538	5'	Usp12	BC068136	90033	3'
5.28067	14	chr5:28068079-28068082	Dpp6	BC085154	9789	3'	Paxip1	NM_018878	3372	3'
9.10805	14	chr9:108048318-108048328	Bsn	NM_007567	0	1st exon	Bsn	NM_007567	0	1st exon
9.64462	14	chr9:64464717-64464746	2410080H04Rik	NM_172522	6211	Intronic	2410080H04Rik	NM_172522	12452	Intronic
10.8865	14	chr10:88654436-88654505	Tmem16d	AK078364	75227	1st intron	Tmem16d	AK039728	32296	1st intron
11.3041	14	chr11:3042887-3042903	BC046305	BC046305	482	Intronic	BC046305	BC046305	366	Intronic
12.1169	14	chr12:116927730-116927753	Ptprn2	AK138655	0	1st exon	Ptprn2	AK138655	0	1st exon
12.2501	14	chr12:25014247-25014263	AK018572	AK018572	327930	intergenic	Taf1b	AK165580	73426	5'
14.635	14	chr14:63501042-63501112	Msra	NM_026322	91064	5'	F830020C16Rik	BC051457	264633	intergenic
14.6352	14	chr14:63522862-63522918	Msra	NM_026322	112877	intergenic	F830020C16Rik	BC051457	242820	intergenic
15.801	14	chr15:80105085-80105106	2510038A11Rik	NM_175109	13534	5'	AK134048	AK134048	338106	intergenic
15.8928	14	chr15:89281224-89281284	C730034F03Rik	NM_176900	20679	3'	Mapk8ip2	NM_021921	643	5'
16.3522	14	chr16:35222722-35222816	Adcy5	NM_001012765	631	Intronic	Adcy5	NM_001012765	589	Intronic
17.2554	14	chr17:25541287-25541361	Metrn	NM_133719	16679	5'	Wdr24	NM_173741	9990	5'
17.2695	14	chr17:26956319-26956347	Lemd2	AK143224	24322	5'	AK138223	AK138223	113714	intergenic
17.91	14	chr17:91001188-91001212	Nrxn1	AB093249	79	5'	Nanp	BC083086	143892	intergenic
Y.511798	14	chrY:530398-530452	Uty	AF057367	4592	Intronic	Uty	AF057367	3222	Intronic
Y.548984	14	chrY:578754-578809	Uty	AF057367	2519	Intronic	Uty	AF057367	2816	Intronic
1.72467	15	chr1:72470334-72470359	BC098191	BC098191	574	5'	Smarcal1	AK169465	46120	5'
2.1041	15	chr2:104100157-104100186	A930018P22Rik	NM_026634	174586	intergenic	Hipk3	NM_010434	130431	intergenic
2.15177	15	chr2:151773416-151773438	2310046K01Rik	NM_027172	72730	3'	Srxn1	BC049957	23536	5'
2.17913	15	chr2:179130126-179130133	Cdh26	AK132328	713357	intergenic	4930591A17Rik	NM_026596	214213	intergenic
4.13963	15	chr4:139630366-139630378	AK030056	AK030056	34994	5'	Arhgef10l	NM_172415	156187	intergenic
4.14714	15	chr4:147137215-147137320	BC072569	BC072569	5537	5'	Ubiad1	NM_027873	141028	intergenic
4.15013	15	chr4:150132909-150132987	Vamp3	NM_009498	231195	intergenic	AK144150	AK144150	491303	intergenic
4.1547	15	chr4:154703331-154703358	Tas1r3	NM_031872	0	intragenic	Tas1r3	NM_031872	0	intragenic
4.41734	15	chr4:41734792-41734837	AK009522	AK009522	21729	1st intron	AK009522	AK009522	23065	1st intron
5.11599	15	chr5:115992514-115992523	AK041990	AK041990	14960	5'	Rpl29	BC094039	70032	3'
7.57459	15	chr7:57460169-57460258	Gabrb3	NM_001038701	511	Intronic	Gabrb3	NM_001038701	173073	Intronic
8.12929	15	chr8:129290710-129290773	Slc35f3	NM_175434	9169	3'	1810063B05Rik	NM_174987	17875	5'
8.24561	15	chr8:24561109-24561173	Ank1	AK147597	286	Intronic	Ank1	AK147597	500	Intronic
9.4371	15	chr9:43710760-43710788	Pvrl1	NM_021424	152325	intergenic	AK138823	AK138823	19183	3'
9.62948	15	chr9:62949263-62949283	Lbxcor1	AB185113	4256	5'	Map2k5	BC028260	12500	3'
11.1149	15	chr11:114868415-114868471	Cd300le	NM_172050	0	intragenic	Cd300le	NM_172050	0	intragenic
12.103	15	chr12:102956249-102956259	Chga	NM_007693	34	1st intron	Chga	NM_007693	679	1st intron
13.1066	15	chr13:106563150-106563157	AK013941	AK013941	147953	intergenic	Htr1a	NM_008308	993	5'
13.1114	15	chr13:111400911-111400995	Rab3c	AK014050	0	1st exon	Rab3c	NM_023852	0	1st exon
18.3734	15	chr18:37344230-37344251	Pcdha1	BC082326	30608	3'	Pcdhb3	NM_053128	82715	5'
18.382	15	chr18:38201436-38201480	Centd3	AK220486	77917	5'	Pcdh1	BC040402	121209	intergenic
1.19474	16	chr1:194736852-194736895	Syt14	NM_181546	451	5'	AA408296	NM_145415	68252	3'
1.34523	16	chr1:34524228-34524250	Tesp2	AK132909	18750	5'	9430069J07Rik	NM_213727	32	5'
1.75157	16	chr1:75160526-75160564	Resp18	NM_009049	1680	1st intron	Resp18	NM_009049	803	1st intron
1.79318	16	chr1:79319047-79319049	Scg2	NM_009129	0	1st exon	Scg2	NM_009129	0	1st exon
2.18169	16	chr2:181694187-181694253	Oprl1	AK043275	43840	3'	Myt1	NM_008665	2226	5'
2.26028	16	chr2:26030369-26030388	Lhx3	NM_010711	120	5'	Qscn6l1	NM_153559	760	3'
3.1054	16	chr3:105403571-105403571	AK016218	AK016218	196709	intergenic	Kcnd3	NM_001039347	176813	intergenic
4.15045	16	chr4:150448878-150449023	Vamp3	NM_009498	547197	intergenic	AK144150	AK144150	175301	intergenic
4.44724	16	chr4:44725524-44725538	Melk	NM_010790	339756	intergenic	Zcchc7	NM_177027	52135	5'
5.13609	16	chr5:136091518-136091543	2900083I11Rik	NM_021403	0	1st exon	2900083I11Rik	NM_021403	0	1st exon
6.12773	16	chr6:127733637-127733694	Prmt8	NM_201371	35226	1st intron	Prmt8	NM_201371	625	1st intron
7.12246	16	chr7:122462135-122462147	BC048553	BC048553	36593	3'	Rbbp6	NM_175023	299824	intergenic
7.27972	16	chr7:27972796-27972803	Dyrk1b	NM_001037957	76746	3'	Cri2	NM_198425	3840	5'
7.44459	16	chr7:44462073-44462093	S69381	S69381	2283	1st intron	S69381	S69381	1118	1st intron
7.81365	16	chr7:81366963-81366965	Ap3b2	AK138496	8342	1st intron	Ap3b2	AK138496	55	1st intron
8.87836	16	chr8:87837537-87837560	A330096I21Rik	NM_144929	291	1st intron	A330096I21Rik	NM_144929	2437	1st intron
9.66101	16	chr9:66105529-66105566	Dapk2	NM_010019	35301	3'	AK036565	AK036565	138094	intergenic
10.5984	16	chr10:59840713-59840731	Cdh23	AJ888001	6505	Intronic	Cdh23	AJ888001	20078	Intronic
12.1029	16	chr12:102951787-102951816	Golga5	NM_013747	52846	3'	Chga	NM_007693	4216	5'
12.8269	16	chr12:82695202-82695214	Map3k9	AK155677	3267	1st intron	Map3k9	AK155677	4128	1st intron
12.8559	16	chr12:85588443-85588454	Tmem90a	NM_001033334	0	1st exon	Tmem90a	NM_001033334	0	1st exon
13.24	16	chr13:23998520-23998536	Scgn	NM_145399	0	1st exon	Scgn	NM_145399	0	1st exon
15.8479	16	chr15:84793500-84793509	5031439G07Rik	NM_001033273	5117	1st intron	5031439G07Rik	NM_001033273	21869	1st intron
8.12732	17	chr8:127320829-127320839	Pgbd5	NM_171824	808	5'	Pgbd5	BC094384	4757	1st intron
8.81327	17	chr8:81327634-81327658	1700031F13Rik	NM_183096	37249	3'	Pou4f2	NM_138944	1433	3'
9.86819	17	chr9:86819784-86819801	AB212223	AB212223	1929	3'	Cyb5r4	AK157312	202	5'
11.1006	17	chr11:100575085-100575138	Rab5c	NM_024456	20831	5'	Hcrt	NM_010410	2670	3'
11.1022	17	chr11:102209558-102209589	Slc4a1	NM_011403	28368	5'	Rap2ip	BC046319	18	5'
11.465	17	chr11:4650467-4650478	Cabp7	NM_138948	3691	5'	Nf2	BC005442	15378	3'
12.4384	17	chr12:43843205-43843296	Immp2l	NM_053122	1017378	intergenic	AY512922	AY512922	837577	intergenic
13.5476	17	chr13:54760464-54760492	Gprin1	NM_012014	1187	5'	Sncb	NM_033610	8003	3'
14.3115	17	chr14:31150899-31150911	Parg	BC059827	24349	3'	1700024G13Rik	NM_001034037	54605	3'
15.3903	17	chr15:39029439-39029478	Rims2	NM_053271	846	1st intron	Rims2	NM_053271	75590	1st intron
18.2589	17	chr18:25895941-25895981	Brunol4	BC052744	73456	1st intron	Brunol4	BC052744	389	1st intron
Y.227782	17	chrY:242138-242172	Jarid1d	AK141096	5099	Intronic	Jarid1d	AK141096	4734	Intronic
1.15472	18	chr1:154718650-154718679	Nmnat2	NM_175460	1253	1st intron	Nmnat2	NM_175460	117349	1st intron
2.15272	18	chr2:152723818-152723829	Xkr7	NM_001011732	0	1st exon	Xkr7	NM_001011732	0	1st exon
2.15547	18	chr2:155467211-155467225	Mmp24	NM_010808	140	1st intron	Mmp24	NM_010808	16748	1st intron
2.16466	18	chr2:164657774-164657820	Mmp9	NM_013599	10747	3'	Slc12a5	AK165769	1647	5'
2.94325	18	chr2:94325580-94325598	Api5	AK134480	86630	5'	Lrrc4c	NM_178725	2942905	intergenic
4.13618	18	chr4:136179331-136179382	C1qa	NM_007572	8520	5'	Epha8	NM_007939	22137	3'
5.37528	18	chr5:37531857-37531890	Crmp1	AK158793	1099	1st intron	Crmp1	NM_007765	2166	5'
8.74599	18	chr8:74600702-74600711	Unc13a	NM_001029873	70	5'	AK087256	AK087256	3230	3'
9.20604	18	chr9:20607703-20607720	Col5a3	AB040491	42271	5'	A230050P20Rik	NM_175687	11385	5'
9.57858	18	chr9:57859190-57859218	4930535E21Rik	AK145264	2670	Intronic	Stra6	AK083120	2719	5'
11.1058	18	chr11:105823973-105823996	Ace	NM_207624	18635	3'	Kcnh6	NM_001037712	307	5'
15.2625	18	chr15:26254553-26254560	AK162044	NM_177597	39	1st intron	AK162044	NM_177597	1138	1st intron
1.70658	19	chr1:70658981-70658985	A830006F12Rik	NM_177164	0	1st exon	A830006F12Rik	NM_177164	0	1st exon
1.75145	19	chr1:75146397-75146428	Ptprn	AK220467	891	1st intron	Ptprn	AK220467	738	1st intron
2.11847	19	chr2:118471161-118471174	1810007E14Rik	NM_025308	1562	3'	Disp2	AK036480	11	5'
2.15826	19	chr2:158261999-158262048	BC054059	NM_145635	62384	3'	Slc32a1	BC052020	40183	5'
2.3824	19	chr2:38240109-38240152	Lhx2	NM_010710	48393	3'	Nek6	NM_021606	93577	5'
4.32929	19	chr4:32929983-32929989	Bach2	NM_007521	20174	3'	Casp8ap2	NM_011997	14138	5'
4.47012	19	chr4:47014153-47014183	Tbc1d2	AK041359	342859	intergenic	Samd6	NM_001024136	22619	3'
6.95187	19	chr6:95189128-95189172	Kbtbd8	NM_001008785	93970	3'	Suclg2	BC080781	250457	intergenic
7.44636	19	chr7:44638224-44638240	Vrk3	NM_133945	537	Intronic	Vrk3	NM_133945	672	Intronic
M.34	19	chrM:2759-2769	No annotation yet				BC012020	BC012020	5023	5'
1.75361	20	chr1:75362760-75362768	A230078I05Rik	NM_177056	0	1st exon	A230078I05Rik	NM_177056	0	1st exon
1.84574	20	chr1:84575410-84575437	Dner	NM_152915	177	5'	Trip12	NM_133975	24796	3'
2.18003	20	chr2:180033956-180033989	Hrh3	AK140374	157	5'	Osbpl2	AK170669	14800	5'
2.21285	20	chr2:21285252-21285261	Thnsl1	NM_177588	152493	intergenic	Gpr158	NM_001004761	63	5'
2.29392	20	chr2:29395785-29395795	Crsp8	BC016537	48993	3'	Rapgef1	NM_001039087	45937	5'
4.12862	20	chr4:128623347-128623348	Hpca	NM_010471	2285	5'	Fndc5	NM_027402	16015	5'
9.21158	20	chr9:21158630-21158644	Ilf3	AK128936	2874	3'	Qtrt1	BC044811	3606	5'
9.34662	20	chr9:34662848-34662882	Kirrel3	NM_026324	1333	Intronic	A130066N16Rik	NM_001002772	5037	3'
9.40624	20	chr9:40624922-40624929	AK038159	AK038159	51183	3'	Bsx	NM_178245	269	5'
11.3564	20	chr11:35642457-35642472	AI595406	NM_001004147	467	5'	Rars	NM_025936	9340	3'
12.1065	20	chr12:106516319-106516359	Vrk1	NM_011705	37879	3'	AK014062	AK014062	1425605	intergenic
14.6586	20	chr14:65864041-65864052	LOC432870	NM_001034881	38931	3'	Pnma2	NM_175498	5467	5'
15.3478	20	chr15:34782100-34782138	Kcns2	NM_181317	0	1st exon	Kcns2	NM_181317	0	1st exon
17.6934	20	chr17:69344372-69344411	AK147961	AK147961	17857	3'	Dlgap1	AK220515	529582	intergenic
18.6417	20	chr18:64168098-64168129	AK154451	AK154451	52990	3'	St8sia3	NM_009182	222642	intergenic
2.17173	21	chr2:171733408-171733462	Cbln4	NM_175631	0	1st exon	Cbln4	NM_175631	0	1st exon
2.25139	21	chr2:25141046-25141050	Grin1	AK158175	0	1st exon	Grin1	BC039157	0	1st exon
4.13039	21	chr4:130387546-130387563	Matn1	NM_010769	160003	intergenic	Ptpru	NM_011214	652978	intergenic
4.13619	21	chr4:136196767-136196835	C1qa	NM_007572	25965	5'	Epha8	NM_007939	4692	3'
8.12768	21	chr8:127679473-127679498	BC094596	BC094596	0	1st exon	BC094596	BC094596	0	1st exon
9.58638	21	chr9:58639975-58639983	AK010725	AK010725	100286	intergenic	Neo1	AK052439	32838	3'
13.5438	21	chr13:54381339-54381339	Cplx2	NM_009946	139	1st intron	Cplx2	NM_009946	6865	1st intron
Y.110662	21	chrY:113824-114471	Zfy1	NM_009570	17767	Intronic	Zfy1	NM_009570	19405	Intronic
5.11435	22	chr5:114352239-114352276	Svop	NM_026805	0	1st exon	Svop	NM_026805	0	1st exon
10.1146	22	chr10:114589076-114589102	Tph2	NM_173391	0	1st exon	Tph2	NM_173391	0	1st exon
12.3102	22	chr12:3110004-3110023	No annotation yet				1700012B15Rik	AK005738	126596	intergenic
12.5652	22	chr12:56518438-56518439	AK016920	AK016920	33412	3'	Garnl1	NM_001003719	2590	3'
17.283	22	chr17:28308102-28308123	Tmhs	NM_026571	356	Intronic	Tmhs	NM_026571	2455	Intronic
19.4231	22	chr19:42309348-42309366	4933417O08Rik	NM_027694	0	1st exon	4933417O08Rik	NM_027694	0	1st exon
1.37162	23	chr1:37163142-37163163	4921511C04Rik	NM_027580	31002	3'	Cnga3	NM_009918	653	5'
2.24579	23	chr2:24584063-24584085	Cacna1b	AF042317	184	1st intron	Cacna1b	AF042317	697	1st intron
5.12134	23	chr5:121339380-121339380	Rph3a	NM_011286	69245	5'	Ptpn11	BC003980	51777	3'
6.11382	23	chr6:113818346-113818360	Atp2b2	AK147399	9931	1st intron	Atp2b2	AK147399	38675	1st intron
9.59375	23	chr9:59376439-59376449	Brunol6	NM_175235	0	1st exon	Brunol6	NM_175235	0	1st exon
15.7252	23	chr15:72517211-72517246	1810044A24Rik	NM_180662	4599	Intronic	1810044A24Rik	NM_180662	3530	Intronic
15.7962	23	chr15:79618999-79619011	Nptxr	NM_030689	1305	Intronic	Nptxr	NM_030689	851	Intronic
2.32839	24	chr2:32840245-32840299	Garnl3	AK133163	1474	Intronic	Garnl3	AK133163	236	Intronic
2.92871	24	chr2:92872761-92872789	4631405J19Rik	BC100298	38493	3'	Trp53i11	NM_001025246	115646	intergenic
M.10652	24	chrM:15429-15438	AK144853	AK144853	3891	3'	N.A.	N.A.	N.A.	N.A.
11.7775	25	chr11:77747087-77747110	AK036145	AK036145	1615	5'	Sez6	AK147705	15	5'
12.1007	25	chr12:100669158-100669165	Calm1	NM_009790	58305	3'	AK147460	AK147460	8496	5'
1.50122	26	chr1:5013009-5013033	Rgs20	AK078208	2130	5'	Atp6v1h	NM_133826	60231	5'
4.13953	26	chr4:139531266-139531267	Igsf21	NM_198610	12406	5'	AK030056	AK030056	61464	3'
10.8044	26	chr10:80440686-80440701	Slc39a3	NM_134135	3652	5'	Sgta	NM_024499	6507	3'
19.1047	26	chr19:10470304-10470347	Nsddr	NM_198114	131692	intergenic	4930579J09Rik	NM_133689	70976	3'
Y.1305075	26	chrY:1311279-1311654	Usp9y	NM_148943	515241	intergenic	Zfy2	NM_009571	79616	3'
1.25173	27	chr1:25173366-25173370	Bai3	BC099951	275	Intronic	AK084043	AK084043	47580	3'
2.33912	27	chr2:33912782-33912828	2610528K11Rik	BC059907	202850	intergenic	Pbx3	AK144363	80952	3'
5.13731	27	chr5:137314932-137314937	Plod3	NM_011962	33770	3'	Ap1s1	NM_007457	4685	3'
9.11899	27	chr9:118998534-118998534	MGC29978	NM_146230	46	Intronic	MGC29978	NM_146230	986	Intronic
11.5545	27	chr11:55451307-55451344	Glra1	AK078258	0	1st exon	Glra1	AK078258	0	1st exon
15.739	27	chr15:73903386-73903426	Gm628	NM_001033365	236480	intergenic	Bai1	NM_174991	440531	intergenic
5.33752	28	chr5:33755211-33755234	AK016722	AK016722	23456	3'	2410018C17Rik	NM_178390	161987	intergenic
11.1184	28	chr11:118401139-118401143	D11Bwg0517e	BC054403	71647	Intronic	D11Bwg0517e	BC054403	25106	Intronic
8.11501	29	chr8:115014967-115014987	Terf2ip	BC012270	109105	intergenic	Cntnap4	NM_130457	441041	intergenic
2.13247	30	chr2:132473216-132473226	Chgb	NM_007694	0	1st exon	Chgb	NM_007694	0	1st exon
2.1576	30	chr2:157604951-157604953	Ctnnbl1	NM_025680	21897	3'	Gm691	NM_198627	1252	5'
15.7635	30	chr15:76349574-76349585	Scrt1	BC089316	411	5'	Fbxl6	AB041571	13397	3'
4.21801	31	chr4:21803141-21803160	E130310K16Rik	NM_172987	933647	intergenic	Ccnc	AK037957	15384	5'
4.30167	31	chr4:3017359-3017360	No annotation yet				Tmem68	NM_028097	458827	intergenic
14.6263	32	chr14:62635781-62635804	Mtmr9	NM_177594	137729	intergenic	Xkr6	NM_173393	113335	intergenic
4.12667	34	chr4:126675996-126675999	Dlgap3	NM_198618	4328	1st intron	Dlgap3	NM_198618	19380	1st intron
19.5087	34	chr19:5087994-5088006	AW125688	NM_001001885	2523	5'	Yif1a	NM_026553	551	5'
2.1364	37	chr2:136405730-136405754	Snap25	BC018249	701	1st intron	Snap25	BC018249	41765	1st intron
Y.2592870	37	chrY:2599794-2599809	Rbmy1a1	U36929	137266	intergenic	N.A.	N.A.	N.A.	N.A.
9.21697	38	chr9:21700847-21700860	BC018242	NM_144935	1546	3'	AK014010	AK014010	4850	3'
17.5587	38	chr17:55875922-55875944	Dpp9	NM_172624	23388	5'	Fem1a	NM_010192	14596	5'
6.12144	40	chr6:121438863-121438875	Iqsec3	NM_001033354	0	1st exon	Iqsec3	AK147351	0	1st exon
14.6266	40	chr14:62667384-62667394	Mtmr9	NM_177594	169326	intergenic	Xkr6	NM_173393	81738	5'
5.11296	41	chr5:112959152-112959155	AB206790	AB206790	141673	intergenic	AK016515	AK016515	98374	3'
18.2581	41	chr18:25811314-25811320	AK082301	AK082301	49959	5'	Brunol4	BC052744	11104	Intronic
11.3	42	chr11:3001395-3001413	No annotation yet				4933439C20Rik	AK161130	22624	5'
9.10868	43	chr9:108684230-108684265	Celsr3	NM_080437	0	1st exon	Celsr3	NM_080437	0	1st exon
15.8465	47	chr15:84657379-84657386	AK042863	AK042863	21458	Intronic	AK042863	AK042863	25121	Intronic
17.6211	48	chr17:6213074-6213087	Tulp4	NM_054040	15977	3'	Dynlt1	BC043018	151223	intergenic
15.7239	53	chr15:72396009-72396011	A830008O07	NM_177819	838503	intergenic	1810044A24Rik	BC070463	20865	3'
8.1407	54	chr8:14072668-14072679	AK163687	AK163687	97953	5'	Dlgap2	NM_172910	23177	5'
15.7794	56	chr15:77947145-77947176	Cacng2	NM_007583	625	5'	Rabl4	NM_025931	39558	3'
9.3	58	chr9:3033085-3033158	No annotation yet				4930433N12Rik	NM_053265	100724	intergenic
19.4986	58	chr19:4989136-4989143	Npas4	NM_153553	252	1st intron	Npas4	NM_153553	501	1st intron
7.60125	66	chr7:6014260-6014261	Zfp78	NM_001025163	27653	3'	Olfr1344	AK029628	26	5'
14.3919	78	chr14:39187705-39187708	Nrg3	NM_008734	802739	intergenic	Sh2d4b	AK050671	534794	intergenic
5.3	82	chr5:3001881-3001888	No annotation yet				Rpl26	X80699	240510	intergenic
9.35053	94	chr9:35055125-35055128	Rpusd4	NM_028040	29498	3'	Cdon	NM_021339	146619	intergenic
14.182	103	chr14:18209899-18209927	Ube2e1	NM_009455	1084951	intergenic	LOC432825	NM_001024706	174925	intergenic
2.98461	191	chr2:98463803-98463817	Lrrc4c	NM_178725	1031307	intergenic	B230118H07Rik	NM_026592	2897808	intergenic
